# Supplementary material for: DFT investigations on the ring-opening polymerization of cyclic carbonates catalyzed by zinc-{β-diiminate} complexes
Source: Royal Society of Chemistry journal article supplement (doi:10.1039/c1py00309g), 2011-01-01
Supplement: c1py00309g.pdf [file c1py00309g.pdf]

# DFT Investigations on the Ring-Opening Polymerization of Cyclic Carbonates Catalyzed by Zinc- $\{\beta$ -diiminate $\}$ Complexes

Iker del Rosal, Pierre Brignoux, Sophie M. Guillaume\*, Jean-François Carpentier\*, Laurent Maron\*

Cartesian coordinates of all optimized structures as they appear in the text

## 1 Introduction

### TMC

G = -381,493855 u.a.

|   |           |           |           |
|---|-----------|-----------|-----------|
| C | 1.334655  | -0.218365 | -2.056752 |
| O | 1.196327  | 0.119536  | -0.671386 |
| C | -0.007619 | 0.232030  | -0.068768 |
| O | -1.126952 | 0.114758  | -0.816503 |
| C | -1.092272 | -0.214501 | -2.210643 |
| C | 0.168143  | 0.309700  | -2.861136 |
| O | -0.081304 | 0.461023  | 1.105747  |
| H | -1.158866 | -1.305822 | -2.312738 |
| H | -1.998986 | 0.223583  | -2.634833 |
| H | 0.232968  | -0.028638 | -3.900302 |
| H | 0.170279  | 1.405233  | -2.859256 |
| H | 1.406397  | -1.310665 | -2.144775 |
| H | 2.290041  | 0.212129  | -2.366155 |

### 7CC

G = -420,760534 u.a.

|   |           |           |           |
|---|-----------|-----------|-----------|
| O | -1.858848 | 0.634909  | 3.572028  |
| C | -1.038023 | -0.098985 | 3.097690  |
| O | -0.949291 | -1.416209 | 3.422370  |
| C | -1.066554 | -2.443491 | 2.416463  |
| H | -2.080346 | -2.852055 | 2.497807  |
| H | -0.360707 | -3.226197 | 2.715251  |
| C | -0.802017 | -1.986955 | 0.991093  |
| H | -1.539865 | -1.224432 | 0.715075  |
| H | -0.985307 | -2.839520 | 0.327330  |
| H | 1.341806  | -2.256638 | 0.734736  |
| C | 0.611259  | -1.439427 | 0.776576  |
| H | 0.656798  | -0.919350 | -0.186021 |
| H | 1.814490  | 0.175602  | 1.612054  |
| C | 1.005528  | -0.495821 | 1.908854  |
| H | 1.326625  | -1.053379 | 2.794026  |
| O | -0.081260 | 0.368242  | 2.266010  |

## 3 Results and Discussion

### 3.1 Ring-opening polymerization of cyclic carbonates by metal dialkylamide as catalyst

#### (BDI)Zn(N(SiMe<sub>3</sub>)<sub>2</sub>)

G = -2338,489821 u.a.

|   |           |           |           |
|---|-----------|-----------|-----------|
| C | 0.068344  | -0.687799 | 0.103228  |
| C | -0.078583 | -0.118604 | 1.389561  |
| C | 1.062465  | 0.193193  | 2.173147  |
| C | 2.326381  | -0.118914 | 1.661370  |
| C | 2.480519  | -0.707283 | 0.412559  |
| C | 1.356766  | -0.974378 | -0.359248 |
| N | -1.388917 | 0.102502  | 1.927562  |
| C | -1.898383 | 1.336954  | 1.964590  |

|    |           |           |           |
|----|-----------|-----------|-----------|
| C  | -1.252828 | 2.466437  | 1.187999  |
| C  | 0.979062  | 0.909191  | 3.518016  |
| C  | 1.665465  | 0.139787  | 4.655875  |
| C  | -1.119051 | -0.912935 | -0.820576 |
| C  | -1.129259 | -2.308555 | -1.452889 |
| Zn | -2.465534 | -1.429050 | 2.628892  |
| N  | -2.333024 | -3.286247 | 2.253714  |
| N  | -3.824461 | -0.368797 | 3.682502  |
| C  | -4.695639 | -1.029626 | 4.612638  |
| C  | -6.074938 | -1.199902 | 4.335275  |
| C  | -6.860552 | -1.893126 | 5.264150  |
| C  | -6.322849 | -2.412207 | 6.432578  |
| C  | -4.970260 | -2.235143 | 6.697174  |
| C  | -4.139081 | -1.548655 | 5.809097  |
| C  | -6.765434 | -0.655652 | 3.089192  |
| C  | -7.432098 | -1.769822 | 2.268051  |
| C  | -2.681476 | -1.310502 | 6.175645  |
| C  | -2.059369 | -2.442094 | 6.999752  |
| C  | -3.844945 | 0.961433  | 3.573018  |
| C  | -4.765273 | 1.809642  | 4.427452  |
| C  | -3.035168 | 1.705929  | 2.697022  |
| C  | -7.825935 | 0.402758  | 3.439515  |
| C  | -2.513659 | 0.030817  | 6.907337  |
| C  | 1.582471  | 2.321328  | 3.424368  |
| C  | -1.168129 | 0.170209  | -1.910921 |
| H  | -5.510978 | 2.302998  | 3.796508  |
| H  | -5.283182 | 1.234353  | 5.193755  |
| H  | -4.185118 | 2.600392  | 4.911964  |
| H  | -1.946007 | 2.799374  | 0.407637  |
| H  | -1.066813 | 3.325621  | 1.838072  |
| H  | -0.316985 | 2.171798  | 0.714798  |
| H  | -3.271569 | 2.764872  | 2.658581  |
| H  | -7.919470 | -2.028112 | 5.060426  |
| H  | -6.953093 | -2.950028 | 7.135435  |
| H  | -4.553245 | -2.635489 | 7.615744  |
| H  | 3.207753  | 0.111751  | 2.254262  |
| H  | 3.472340  | -0.942502 | 0.036287  |
| H  | 1.480665  | -1.405644 | -1.348709 |
| H  | 1.443023  | 2.861085  | 4.367701  |
| H  | 2.659127  | 2.273039  | 3.226853  |
| H  | 1.128959  | 2.912289  | 2.624751  |
| H  | 1.547765  | 0.683467  | 5.599930  |
| H  | 1.246729  | -0.860354 | 4.783316  |
| H  | 2.740708  | 0.030880  | 4.475885  |
| H  | -1.460321 | 0.210110  | 7.149459  |
| H  | -2.867371 | 0.868965  | 6.301722  |
| H  | -3.081304 | 0.030468  | 7.844732  |
| H  | -0.980677 | -2.283016 | 7.098533  |
| H  | -2.467534 | -2.480995 | 8.015619  |
| H  | -2.217365 | -3.418387 | 6.532562  |
| H  | -8.244130 | 0.839216  | 2.525646  |
| H  | -8.655170 | -0.047037 | 3.996476  |
| H  | -7.425232 | 1.214121  | 4.050850  |
| H  | -7.837782 | -1.362059 | 1.335566  |
| H  | -6.729995 | -2.565206 | 2.016830  |
| H  | -8.265286 | -2.220960 | 2.817970  |
| H  | -2.053606 | 0.040223  | -2.543130 |
| H  | -1.203250 | 1.176212  | -1.483034 |
| H  | -0.284349 | 0.115899  | -2.556848 |
| H  | -2.022238 | -2.435429 | -2.074836 |
| H  | -0.262041 | -2.470797 | -2.102188 |
| H  | -1.132417 | -3.085695 | -0.685305 |
| H  | -0.078312 | 1.011575  | 3.780437  |
| H  | -2.113149 | -1.237256 | 5.239749  |
| H  | -2.028805 | -0.815416 | -0.219051 |
| H  | -6.005389 | -0.183195 | 2.457598  |
| Si | -3.727362 | -4.001715 | 1.492646  |
| Si | -0.973866 | -4.235321 | 2.789415  |
| C  | -1.507284 | -5.727704 | 3.833876  |
| C  | 0.108236  | -4.894859 | 1.379734  |

|   |           |           |           |
|---|-----------|-----------|-----------|
| C | 0.172072  | -3.176417 | 3.851023  |
| C | -3.306976 | -5.469545 | 0.366832  |
| C | -4.989443 | -4.649640 | 2.746953  |
| C | -4.538210 | -2.706980 | 0.365537  |
| H | -4.230953 | -5.848959 | -0.086458 |
| H | -2.632560 | -5.184812 | -0.446795 |
| H | -2.848182 | -6.302991 | 0.908664  |
| H | -5.894737 | -5.024301 | 2.254045  |
| H | -4.559478 | -5.479771 | 3.318410  |
| H | -5.287481 | -3.881712 | 3.467420  |
| H | -5.476853 | -3.077776 | -0.061795 |
| H | -4.768038 | -1.766022 | 0.879612  |
| H | -3.867854 | -2.473521 | -0.467820 |
| H | -0.628085 | -6.266753 | 4.206573  |
| H | -2.101816 | -5.415373 | 4.699100  |
| H | -2.109072 | -6.443357 | 3.263461  |
| H | 1.009538  | -3.774486 | 4.228805  |
| H | 0.597728  | -2.360616 | 3.257364  |
| H | -0.341904 | -2.749523 | 4.718470  |
| H | 0.932230  | -5.492692 | 1.788341  |
| H | -0.442729 | -5.529648 | 0.679428  |
| H | 0.550566  | -4.069755 | 0.811597  |

### I<sub>TMC</sub>

G = -2719,973884 u.a.

|    |           |            |           |
|----|-----------|------------|-----------|
| Zn | -3.917855 | -6.580846  | -2.035493 |
| N  | -2.935468 | -6.029993  | -0.369466 |
| C  | -1.919492 | -6.783981  | 0.064149  |
| C  | -1.238137 | -6.511393  | 1.388670  |
| C  | -1.405777 | -7.899824  | -0.615971 |
| C  | -1.948871 | -8.667985  | -1.653602 |
| C  | -1.170085 | -9.927698  | -1.971832 |
| N  | -3.075884 | -8.372391  | -2.310033 |
| C  | -3.483012 | -7.536146  | -6.509098 |
| C  | -2.890464 | -8.052672  | -5.195380 |
| C  | -1.431552 | -8.485538  | -5.414262 |
| C  | -3.701073 | -9.351599  | -3.145469 |
| C  | -3.696912 | -9.169913  | -4.550780 |
| H  | -3.565583 | -12.272853 | 0.284991  |
| C  | -3.723880 | -12.145075 | -0.790608 |
| C  | -4.395368 | -10.081826 | -5.346536 |
| C  | -5.081805 | -11.154224 | -4.787391 |
| C  | -5.055630 | -11.339066 | -3.412137 |
| C  | -4.368970 | -10.460420 | -2.566083 |
| C  | -4.347978 | -10.767361 | -1.071740 |
| C  | -5.744442 | -10.703550 | -0.436071 |
| C  | -7.113563 | -7.671613  | -2.187642 |
| C  | -7.230076 | -6.799939  | -5.063438 |
| Si | -6.795646 | -6.194881  | -3.320051 |
| N  | -5.151886 | -5.649718  | -3.146774 |
| C  | -2.186993 | -10.504797 | 3.253662  |
| O  | -1.872000 | -9.993922  | 2.211654  |
| O  | -1.951275 | -9.874215  | 4.420241  |
| C  | -8.050603 | -4.843419  | -2.868970 |
| C  | -2.268515 | -10.457713 | 5.692823  |
| C  | -3.455898 | -11.387225 | 5.581642  |
| C  | -3.144632 | -12.379305 | 4.484177  |
| C  | -5.344865 | -3.761586  | -5.526279 |
| Si | -4.583467 | -4.154139  | -3.832620 |
| C  | -2.712799 | -4.272786  | -4.132305 |
| C  | -4.954130 | -2.655889  | -2.733501 |
| C  | -6.867204 | -6.078535  | 1.362649  |
| C  | -1.367203 | -2.366058  | -1.384307 |
| C  | -5.354652 | -6.281180  | 1.225549  |
| C  | -3.364772 | -4.893712  | 0.391884  |
| C  | -1.302921 | -3.512255  | -0.363710 |
| C  | -4.833787 | -7.155511  | 2.377620  |
| C  | -0.131289 | -3.255231  | 0.599413  |
| C  | -2.621267 | -3.686757  | 0.381820  |

|   |           |            |           |
|---|-----------|------------|-----------|
| C | -4.571136 | -4.980045  | 1.131029  |
| C | -5.011946 | -3.857498  | 1.836482  |
| C | -4.292337 | -2.668782  | 1.830001  |
| C | -3.109053 | -2.595172  | 1.109873  |
| O | -2.806065 | -11.701881 | 3.264871  |
| H | -1.489646 | -1.398510  | -0.885065 |
| H | -1.288094 | -7.418959  | 1.998499  |
| H | -3.783487 | -7.424272  | 2.244926  |
| H | -5.411303 | -8.084722  | 2.442128  |
| H | -6.199596 | -9.717254  | -0.548534 |
| H | -4.377835 | -12.954583 | -1.134765 |
| H | -2.759686 | -12.268044 | -1.291098 |
| H | -5.679311 | -10.930911 | 0.633909  |
| H | -3.729418 | -10.018664 | -0.569665 |
| H | -3.997188 | -13.014309 | 4.233509  |
| H | -2.304200 | -13.026630 | 4.766096  |
| H | -1.382680 | -10.994543 | 6.056006  |
| H | -2.454365 | -9.612531  | 6.359408  |
| H | -6.422322 | -11.435574 | -0.889796 |
| H | -5.577665 | -12.188187 | -2.977883 |
| H | -5.624932 | -11.847677 | -5.423843 |
| H | -4.400405 | -9.953063  | -6.424407 |
| H | -1.380265 | -9.343275  | -6.094926 |
| H | -0.946339 | -8.771197  | -4.477910 |
| H | -0.850705 | -7.668456  | -5.857107 |
| H | -2.928927 | -6.652609  | -6.843392 |
| H | -3.410527 | -8.276921  | -7.313591 |
| H | -4.532670 | -7.254329  | -6.394451 |
| H | -2.883215 | -7.214080  | -4.491545 |
| H | -0.120636 | -9.667829  | -2.142453 |
| H | -1.552264 | -10.450803 | -2.848210 |
| H | -1.196162 | -10.607838 | -1.115336 |
| H | -0.527873 | -8.337037  | -0.152460 |
| H | -2.197021 | -2.487540  | -2.081504 |
| H | -0.437594 | -2.320901  | -1.962531 |
| H | -1.097382 | -4.438127  | -0.910828 |
| H | 0.813210  | -3.210737  | 0.045702  |
| H | -0.040177 | -4.030190  | 1.363481  |
| H | -0.254570 | -2.296395  | 1.115360  |
| H | -0.178147 | -6.293747  | 1.224366  |
| H | -1.684491 | -5.682526  | 1.936646  |
| H | -2.543389 | -1.667011  | 1.109022  |
| H | -4.652562 | -1.806605  | 2.384644  |
| H | -5.934683 | -3.914645  | 2.405323  |
| H | -5.180070 | -6.839029  | 0.296861  |
| H | -7.259744 | -5.408257  | 0.592518  |
| H | -7.382839 | -7.040193  | 1.271478  |
| H | -7.137367 | -5.666080  | 2.341182  |
| H | -4.932190 | -6.626701  | 3.332831  |
| H | -3.625316 | -11.905944 | 6.530524  |
| H | -4.361698 | -10.821636 | 5.337474  |
| H | -9.072483 | -5.239754  | -2.903836 |
| H | -7.873339 | -4.457757  | -1.859333 |
| H | -8.008693 | -3.992301  | -3.557221 |
| H | -8.150907 | -8.012173  | -2.286318 |
| H | -6.468541 | -8.513042  | -2.461830 |
| H | -6.948053 | -7.430703  | -1.132774 |
| H | -8.285506 | -7.095968  | -5.107749 |
| H | -7.068795 | -6.037752  | -5.831481 |
| H | -6.630338 | -7.678668  | -5.323212 |
| H | -4.915477 | -2.826431  | -5.906248 |
| H | -5.133083 | -4.545494  | -6.260463 |
| H | -6.430401 | -3.624150  | -5.484280 |
| H | -2.297993 | -3.303554  | -4.432092 |
| H | -2.152157 | -4.603359  | -3.249737 |
| H | -2.504843 | -4.981188  | -4.941057 |
| H | -4.525422 | -1.735394  | -3.148356 |
| H | -6.036510 | -2.507216  | -2.652509 |
| H | -4.568382 | -2.782166  | -1.717058 |

TS(I<sub>TMC</sub>→II<sub>TMC</sub>)

G = -2719,90313 u.a.

|    |           |            |           |
|----|-----------|------------|-----------|
| Zn | -3.646006 | -7.291950  | -0.976729 |
| N  | -2.241738 | -5.961731  | -0.150325 |
| C  | -0.989794 | -6.387858  | 0.029025  |
| C  | -0.000062 | -5.598641  | 0.869386  |
| C  | -0.439936 | -7.567255  | -0.496166 |
| C  | -0.980445 | -8.535664  | -1.346295 |
| C  | 0.039156  | -9.518645  | -1.895493 |
| N  | -2.263928 | -8.615149  | -1.722518 |
| C  | -2.954142 | -7.269060  | -5.010952 |
| C  | -1.793924 | -8.167094  | -4.563416 |
| C  | -0.775533 | -8.328530  | -5.698816 |
| C  | -2.547936 | -9.682361  | -2.637247 |
| C  | -2.305249 | -9.495092  | -4.017513 |
| H  | -2.260456 | -11.728236 | 1.183004  |
| C  | -1.999649 | -11.511790 | 0.140839  |
| C  | -2.538988 | -10.565295 | -4.886925 |
| C  | -2.967963 | -11.797799 | -4.409939 |
| C  | -3.186396 | -11.972174 | -3.048134 |
| C  | -2.996001 | -10.928022 | -2.137412 |
| C  | -3.266092 | -11.142659 | -0.650827 |
| C  | -4.340992 | -12.203372 | -0.382951 |
| C  | -5.889422 | -9.689821  | -3.134094 |
| C  | -6.740010 | -7.105986  | -4.375201 |
| Si | -6.633981 | -8.021495  | -2.709134 |
| N  | -5.775706 | -7.094557  | -1.427782 |
| C  | -5.809425 | -8.063940  | 0.419110  |
| O  | -4.582394 | -8.005101  | 0.680551  |
| O  | -6.372082 | -9.244564  | -0.017273 |
| C  | -8.448164 | -8.438966  | -2.303625 |
| C  | -7.036201 | -9.952197  | 1.046169  |
| C  | -8.224275 | -9.139848  | 1.580429  |
| C  | -8.020980 | -7.690921  | 1.146068  |
| C  | -8.199573 | -5.109341  | -1.693250 |
| Si | -6.338246 | -5.390858  | -1.397533 |
| C  | -5.474779 | -4.390392  | -2.748808 |
| C  | -6.049095 | -4.527064  | 0.247819  |
| C  | -4.300168 | -5.867937  | 3.350178  |
| C  | -2.424796 | -2.538759  | -2.844289 |
| C  | -2.904002 | -5.631211  | 2.757870  |
| C  | -2.543423 | -4.660289  | 0.379569  |
| C  | -1.944405 | -3.663882  | -1.918536 |
| C  | -1.911997 | -5.376221  | 3.906492  |
| C  | -0.407851 | -3.723312  | -1.992569 |
| C  | -2.447068 | -3.536537  | -0.482201 |
| C  | -2.885237 | -4.491312  | 1.743829  |
| C  | -3.182954 | -3.201752  | 2.200603  |
| C  | -3.134543 | -2.101376  | 1.357839  |
| C  | -2.759220 | -2.273956  | 0.030061  |
| O  | -6.632530 | -7.352693  | 1.223477  |
| H  | -1.910347 | -1.595519  | -2.627609 |
| H  | 0.013887  | -6.015441  | 1.881634  |
| H  | -0.908520 | -5.128030  | 3.551295  |
| H  | -1.838168 | -6.263536  | 4.544950  |
| H  | -5.245195 | -12.032874 | -0.974352 |
| H  | -1.522145 | -12.406343 | -0.276365 |
| H  | -1.266885 | -10.702856 | 0.152282  |
| H  | -4.617254 | -12.185855 | 0.676465  |
| H  | -3.634698 | -10.192413 | -0.249326 |
| H  | -8.532117 | -6.980822  | 1.798182  |
| H  | -8.363548 | -7.542452  | 0.119963  |
| H  | -7.339251 | -10.903090 | 0.606448  |
| H  | -6.307575 | -10.156723 | 1.838898  |
| H  | -3.981894 | -13.216265 | -0.599590 |
| H  | -3.524044 | -12.939258 | -2.688712 |
| H  | -3.132000 | -12.622509 | -5.098424 |
| H  | -2.364840 | -10.437435 | -5.951375 |
| H  | -1.237472 | -8.712105  | -6.615086 |

|   |           |            |           |
|---|-----------|------------|-----------|
| H | 0.036707  | -9.009908  | -5.425147 |
| H | -0.333872 | -7.357257  | -5.945809 |
| H | -2.582370 | -6.310096  | -5.389404 |
| H | -3.533894 | -7.747060  | -5.808413 |
| H | -3.634633 | -7.062929  | -4.180168 |
| H | -1.287678 | -7.646318  | -3.744512 |
| H | 0.316012  | -9.236907  | -2.917433 |
| H | -0.336712 | -10.541012 | -1.941293 |
| H | 0.946536  | -9.500638  | -1.289155 |
| H | 0.606580  | -7.713122  | -0.257583 |
| H | -3.500232 | -2.363784  | -2.769734 |
| H | -2.195632 | -2.793621  | -3.884189 |
| H | -2.318255 | -4.617515  | -2.312326 |
| H | -0.083958 | -3.727478  | -3.039549 |
| H | -0.001571 | -4.618715  | -1.520834 |
| H | 0.035776  | -2.846115  | -1.508186 |
| H | 1.008571  | -5.704072  | 0.463719  |
| H | -0.240895 | -4.539482  | 0.946038  |
| H | -2.697592 | -1.405778  | -0.618184 |
| H | -3.373501 | -1.110222  | 1.734065  |
| H | -3.455154 | -3.063180  | 3.243739  |
| H | -2.609775 | -6.549224  | 2.240723  |
| H | -5.021501 | -6.153509  | 2.585203  |
| H | -4.257472 | -6.676633  | 4.088922  |
| H | -4.669064 | -4.971874  | 3.862994  |
| H | -2.245839 | -4.546883  | 4.540421  |
| H | -9.176882 | -9.506005  | 1.183824  |
| H | -8.267299 | -9.215621  | 2.671457  |
| H | -8.895571 | -8.832717  | -3.225067 |
| H | -8.520753 | -9.227153  | -1.549511 |
| H | -9.063688 | -7.593632  | -1.989405 |
| H | -6.630158 | -10.233172 | -3.733963 |
| H | -4.974789 | -9.626820  | -3.725633 |
| H | -5.685485 | -10.279451 | -2.240792 |
| H | -7.153702 | -7.816258  | -5.102055 |
| H | -7.401312 | -6.235394  | -4.362898 |
| H | -5.767087 | -6.786645  | -4.755852 |
| H | -8.347877 | -4.022740  | -1.646608 |
| H | -8.574515 | -5.446274  | -2.662391 |
| H | -8.830218 | -5.544874  | -0.911782 |
| H | -5.666242 | -3.323509  | -2.586419 |
| H | -4.392798 | -4.538714  | -2.733072 |
| H | -5.829710 | -4.642603  | -3.750552 |
| H | -6.089285 | -3.443983  | 0.085103  |
| H | -6.820811 | -4.788767  | 0.975882  |
| H | -5.082706 | -4.748626  | 0.696961  |

## $\Pi_{\text{TMC}}$

$G = -2719,964772$  u.a.

|    |           |           |           |
|----|-----------|-----------|-----------|
| C  | -3.315941 | -3.611419 | 2.338289  |
| C  | -2.796836 | -4.828241 | 1.884065  |
| C  | -2.288196 | -4.891554 | 0.569125  |
| C  | -2.291300 | -3.750681 | -0.267380 |
| C  | -2.827192 | -2.561695 | 0.234052  |
| C  | -3.337007 | -2.485984 | 1.525275  |
| C  | -2.789992 | -6.028244 | 2.819665  |
| C  | -4.214016 | -6.417454 | 3.239876  |
| N  | -1.779490 | -6.132987 | 0.058498  |
| Zn | -2.970115 | -7.420818 | -0.842670 |
| O  | -5.787050 | -7.537710 | 0.308739  |
| C  | -6.785343 | -8.314570 | 0.959718  |
| C  | -6.436807 | -9.804601 | 0.839600  |
| C  | -5.499293 | -9.945938 | -0.361543 |
| O  | -5.887150 | -9.087191 | -1.416367 |
| C  | -5.803991 | -7.683059 | -1.120215 |
| N  | -6.996289 | -7.113300 | -1.720638 |
| Si | -7.967588 | -8.175939 | -2.776424 |
| C  | -9.380058 | -7.174970 | -3.554067 |
| C  | -1.754823 | -3.795653 | -1.692072 |

|    |           |            |           |
|----|-----------|------------|-----------|
| C  | -0.868824 | -2.591025  | -2.036263 |
| C  | -1.907933 | -5.787449  | 4.053832  |
| C  | -0.458737 | -6.344139  | 0.097805  |
| C  | 0.434230  | -5.312175  | 0.747549  |
| C  | 0.189044  | -7.455272  | -0.462728 |
| C  | -0.334649 | -8.570738  | -1.137911 |
| N  | -1.638130 | -8.830340  | -1.277276 |
| C  | -2.046361 | -10.050284 | -1.912132 |
| C  | -2.250830 | -10.081288 | -3.308089 |
| C  | -2.707060 | -11.270683 | -3.885639 |
| C  | -2.933079 | -12.405585 | -3.118133 |
| C  | -2.706398 | -12.366564 | -1.746313 |
| C  | -2.269405 | -11.199067 | -1.113177 |
| C  | -1.981154 | -8.874653  | -4.195988 |
| C  | -1.026085 | -9.212695  | -5.350272 |
| C  | -2.024465 | -11.193321 | 0.393674  |
| C  | -0.580361 | -11.587290 | 0.748587  |
| C  | -2.987373 | -12.097965 | 1.173994  |
| C  | 0.692486  | -9.472343  | -1.788824 |
| O  | -4.660879 | -7.129997  | -1.578452 |
| C  | -3.284608 | -8.264232  | -4.728885 |
| Si | -7.208866 | -5.344272  | -1.630646 |
| C  | -6.729634 | -4.517756  | -3.262078 |
| C  | -6.193624 | -4.578726  | -0.244345 |
| C  | -9.002997 | -4.893193  | -1.211444 |
| C  | -2.902502 | -3.931381  | -2.702976 |
| C  | -8.870847 | -9.581238  | -1.881940 |
| C  | -7.001298 | -8.870088  | -4.241574 |
| H  | -0.769847 | -8.305028  | -5.907299 |
| H  | -2.773035 | -13.159238 | 1.006309  |
| H  | 0.062779  | -5.036529  | 1.737578  |
| H  | -0.065472 | -2.451962  | -1.305100 |
| H  | -0.409850 | -2.731469  | -3.020742 |
| H  | -0.453057 | -11.622072 | 1.836328  |
| H  | -3.565237 | -3.060294  | -2.658328 |
| H  | -0.875810 | -5.547759  | 3.779366  |
| H  | -1.886675 | -6.679986  | 4.689090  |
| H  | -4.032408 | -11.922683 | 0.907087  |
| H  | -0.343263 | -12.580327 | 0.350414  |
| H  | 0.151940  | -10.880807 | 0.354323  |
| H  | -2.876568 | -11.917671 | 2.248365  |
| H  | -2.174485 | -10.163758 | 0.741871  |
| H  | -6.811231 | -7.974537  | 1.998142  |
| H  | -7.758176 | -8.097377  | 0.503380  |
| H  | -5.501550 | -10.954993 | -0.780502 |
| H  | -4.465652 | -9.725643  | -0.059956 |
| H  | -2.880251 | -13.260562 | -1.155029 |
| H  | -3.282769 | -13.321526 | -3.586660 |
| H  | -2.882100 | -11.306566 | -4.957549 |
| H  | -1.482019 | -9.911259  | -6.060167 |
| H  | -0.096316 | -9.666539  | -4.992223 |
| H  | -3.068783 | -7.384001  | -5.345535 |
| H  | -3.826250 | -8.983193  | -5.353183 |
| H  | -3.946214 | -7.959948  | -3.913380 |
| H  | -1.489827 | -8.113179  | -3.580898 |
| H  | 1.629382  | -9.464602  | -1.227565 |
| H  | 0.908872  | -9.089618  | -2.793507 |
| H  | 0.345761  | -10.499386 | -1.901206 |
| H  | 1.270399  | -7.434044  | -0.395979 |
| H  | -3.511233 | -4.817849  | -2.502316 |
| H  | -2.511837 | -4.005604  | -3.724314 |
| H  | -1.132130 | -4.691131  | -1.787557 |
| H  | -1.442417 | -1.659078  | -2.079203 |
| H  | 1.454859  | -5.685504  | 0.842416  |
| H  | 0.456803  | -4.390736  | 0.156833  |
| H  | -2.846454 | -1.678634  | -0.398445 |
| H  | -3.748568 | -1.551149  | 1.895943  |
| H  | -3.711287 | -3.548332  | 3.348933  |
| H  | -2.363361 | -6.873448  | 2.269199  |
| H  | -4.840917 | -6.598029  | 2.363278  |

|   |            |            |           |
|---|------------|------------|-----------|
| H | -4.196381  | -7.325940  | 3.852971  |
| H | -4.682087  | -5.626837  | 3.837027  |
| H | -2.289271  | -4.958839  | 4.660773  |
| H | -7.345108  | -10.399120 | 0.699039  |
| H | -5.935856  | -10.177037 | 1.740918  |
| H | -9.655630  | -9.978430  | -2.537137 |
| H | -8.205367  | -10.405674 | -1.617162 |
| H | -9.362707  | -9.226385  | -0.969444 |
| H | -6.579954  | -8.059488  | -4.845687 |
| H | -6.181997  | -9.513469  | -3.916161 |
| H | -7.669994  | -9.452263  | -4.887341 |
| H | -9.826714  | -7.816964  | -4.323572 |
| H | -10.171860 | -6.929816  | -2.841016 |
| H | -9.068285  | -6.252552  | -4.051088 |
| H | -9.014792  | -3.872909  | -0.809317 |
| H | -9.682436  | -4.915963  | -2.065930 |
| H | -9.408794  | -5.552946  | -0.436771 |
| H | -5.695423  | -4.766184  | -3.516825 |
| H | -7.361724  | -4.837522  | -4.096008 |
| H | -6.809850  | -3.427084  | -3.184543 |
| H | -6.309385  | -3.489199  | -0.291308 |
| H | -6.545161  | -4.912537  | 0.735427  |
| H | -5.131050  | -4.812296  | -0.315412 |

### TS(II<sub>TMC</sub>→III<sub>TMC</sub>)

G = -2719,949423 u.a.

|    |           |            |           |
|----|-----------|------------|-----------|
| C  | -4.232179 | -3.327693  | 1.503710  |
| C  | -3.706808 | -4.621463  | 1.420942  |
| C  | -2.741651 | -4.897148  | 0.423861  |
| C  | -2.286781 | -3.866589  | -0.438813 |
| C  | -2.849793 | -2.592850  | -0.312944 |
| C  | -3.821935 | -2.319567  | 0.640235  |
| C  | -4.118268 | -5.656311  | 2.457229  |
| C  | -5.635400 | -5.726741  | 2.661547  |
| N  | -2.233153 | -6.227426  | 0.254922  |
| Zn | -3.270108 | -7.671505  | -0.695723 |
| O  | -5.087792 | -7.907094  | 0.208157  |
| C  | -5.578854 | -8.822599  | 1.156022  |
| C  | -5.378041 | -10.275554 | 0.695836  |
| C  | -5.356023 | -10.328128 | -0.834167 |
| O  | -6.252074 | -9.370344  | -1.383613 |
| C  | -5.816083 | -8.049458  | -1.423601 |
| N  | -6.963828 | -7.256820  | -1.538502 |
| Si | -8.558920 | -8.113556  | -1.506766 |
| C  | -9.965239 | -6.843777  | -1.413261 |
| C  | -1.191304 | -4.072946  | -1.479438 |
| C  | 0.017403  | -3.162531  | -1.206012 |
| C  | -3.412363 | -5.388394  | 3.797004  |
| C  | -0.990070 | -6.496931  | 0.662680  |
| C  | -0.257077 | -5.550699  | 1.593969  |
| C  | -0.233323 | -7.610635  | 0.265799  |
| C  | -0.503278 | -8.601259  | -0.694852 |
| N  | -1.718289 | -8.893373  | -1.164874 |
| C  | -1.830171 | -9.942293  | -2.138531 |
| C  | -1.839484 | -9.631921  | -3.516760 |
| C  | -1.926581 | -10.680478 | -4.438857 |
| C  | -1.993819 | -12.003973 | -4.027738 |
| C  | -1.997640 | -12.297921 | -2.669054 |
| C  | -1.930038 | -11.289532 | -1.702807 |
| C  | -1.731075 | -8.208101  | -4.041983 |
| C  | -0.432802 | -7.997837  | -4.836373 |
| C  | -1.969344 | -11.668873 | -0.224330 |
| C  | -0.586926 | -12.018792 | 0.352295  |
| C  | -2.922973 | -12.839358 | 0.059027  |
| C  | 0.730696  | -9.281298  | -1.254748 |
| O  | -4.732962 | -7.757277  | -2.068687 |
| C  | -2.951944 | -7.822790  | -4.889285 |
| Si | -6.878970 | -5.580382  | -2.193265 |
| C  | -7.718693 | -5.529799  | -3.889447 |

|   |            |            |           |
|---|------------|------------|-----------|
| C | -5.146821  | -4.931308  | -2.479913 |
| C | -7.681828  | -4.369451  | -0.988233 |
| C | -1.693930  | -3.850884  | -2.912791 |
| C | -8.928364  | -9.188269  | 0.002547  |
| C | -8.807335  | -9.106024  | -3.092594 |
| H | -0.343236  | -6.952810  | -5.152556 |
| H | -2.502859  | -13.791752 | -0.282560 |
| H | -0.860396  | -4.692559  | 1.887024  |
| H | 0.393218   | -3.274885  | -0.185255 |
| H | 0.834328   | -3.394892  | -1.898176 |
| H | -0.688287  | -12.371737 | 1.384817  |
| H | -2.047903  | -2.823922  | -3.056850 |
| H | -2.323697  | -5.385863  | 3.691664  |
| H | -3.677810  | -6.156234  | 4.532698  |
| H | -3.893943  | -12.713540 | -0.426774 |
| H | -0.115055  | -12.818930 | -0.229381 |
| H | 0.089816   | -11.163558 | 0.364704  |
| H | -3.089579  | -12.935651 | 1.137167  |
| H | -2.334144  | -10.789043 | 0.319195  |
| H | -5.085745  | -8.646839  | 2.121166  |
| H | -6.646641  | -8.624442  | 1.307211  |
| H | -5.689153  | -11.295959 | -1.216989 |
| H | -4.353602  | -10.150570 | -1.234129 |
| H | -2.061316  | -13.334554 | -2.351684 |
| H | -2.049542  | -12.804383 | -4.760569 |
| H | -1.932005  | -10.450882 | -5.501298 |
| H | -0.414778  | -8.618298  | -5.739309 |
| H | 0.453752   | -8.250682  | -4.246761 |
| H | -2.867041  | -6.782120  | -5.222531 |
| H | -3.027485  | -8.447376  | -5.786550 |
| H | -3.872892  | -7.928798  | -4.311135 |
| H | -1.701069  | -7.535109  | -3.178798 |
| H | 1.512466   | -9.348089  | -0.494349 |
| H | 1.125340   | -8.661165  | -2.067978 |
| H | 0.539425   | -10.272158 | -1.663992 |
| H | 0.783155   | -7.614164  | 0.645420  |
| H | -2.518593  | -4.522947  | -3.158366 |
| H | -0.882943  | -4.023494  | -3.629274 |
| H | -0.847379  | -5.108927  | -1.412091 |
| H | -0.240368  | -2.106921  | -1.345963 |
| H | 0.037660   | -6.099606  | 2.494641  |
| H | 0.662493   | -5.185946  | 1.127406  |
| H | -2.514572  | -1.799012  | -0.975780 |
| H | -4.247620  | -1.322942  | 0.719844  |
| H | -4.969475  | -3.103896  | 2.269688  |
| H | -3.787964  | -6.632418  | 2.090174  |
| H | -6.144608  | -5.949490  | 1.721343  |
| H | -5.881718  | -6.517904  | 3.378354  |
| H | -6.039073  | -4.792826  | 3.067767  |
| H | -3.708510  | -4.416050  | 4.206976  |
| H | -6.180130  | -10.905070 | 1.098524  |
| H | -4.435720  | -10.679724 | 1.079841  |
| H | -9.971812  | -9.518479  | -0.076049 |
| H | -8.299084  | -10.076239 | 0.073318  |
| H | -8.845093  | -8.619666  | 0.934441  |
| H | -8.780628  | -8.454866  | -3.972176 |
| H | -8.031590  | -9.865670  | -3.212245 |
| H | -9.782859  | -9.606084  | -3.079449 |
| H | -10.896975 | -7.409731  | -1.539300 |
| H | -10.012216 | -6.371776  | -0.426641 |
| H | -9.965762  | -6.055251  | -2.168112 |
| H | -7.650891  | -3.363826  | -1.424584 |
| H | -8.719581  | -4.589463  | -0.734143 |
| H | -7.101347  | -4.337891  | -0.060360 |
| H | -7.156092  | -6.151799  | -4.594472 |
| H | -8.757426  | -5.867777  | -3.904635 |
| H | -7.700431  | -4.502270  | -4.271941 |
| H | -5.232788  | -3.894074  | -2.826876 |
| H | -4.551013  | -4.920798  | -1.565332 |
| H | -4.621640  | -5.516438  | -3.235794 |

### III<sub>TMC</sub>

G = -2720,013522 u.a.

|    |            |           |           |
|----|------------|-----------|-----------|
| C  | -3.631400  | -0.051232 | -0.157771 |
| C  | -4.600028  | -0.068277 | 1.000966  |
| N  | -4.450022  | 0.822375  | 1.981830  |
| N  | -6.856173  | -0.627961 | 3.006748  |
| C  | -5.617231  | -1.042559 | 0.963355  |
| C  | -6.650839  | -1.311208 | 1.876262  |
| C  | -7.579779  | -2.453863 | 1.541291  |
| H  | -7.555947  | -3.214470 | 2.327993  |
| C  | -6.517697  | -4.094072 | 5.299786  |
| C  | -6.372666  | -2.575346 | 5.132896  |
| C  | -7.711917  | -1.878678 | 4.941273  |
| C  | -7.936205  | -0.968550 | 3.884174  |
| C  | -9.184140  | -0.323059 | 3.734097  |
| C  | -9.475543  | 2.109714  | 3.140481  |
| C  | -5.605307  | -1.970078 | 6.317996  |
| C  | -8.750044  | -2.113871 | 5.847508  |
| C  | -9.979111  | -1.477823 | 5.719639  |
| H  | -8.589935  | -2.804144 | 6.671714  |
| C  | -10.188917 | -0.593370 | 4.668222  |
| C  | -10.735701 | 0.350473  | 1.837313  |
| H  | -2.770054  | -0.511948 | 3.052119  |
| C  | -4.922656  | 3.411786  | 0.715020  |
| C  | -0.641948  | -0.552000 | 2.920704  |
| C  | -4.794035  | 4.027614  | -0.683774 |
| C  | -3.583012  | 3.028210  | 1.325099  |
| C  | -1.142273  | 2.430593  | 2.568163  |
| C  | -2.536868  | 3.955160  | 1.342454  |
| H  | -2.680523  | 4.926741  | 0.877380  |
| H  | -0.198050  | 2.212232  | 3.059838  |
| C  | -1.322420  | 3.663048  | 1.951922  |
| C  | -2.156040  | 1.468133  | 2.577334  |
| C  | -2.004111  | 0.386108  | 4.835742  |
| C  | -5.683948  | 4.353932  | 1.661979  |
| Zn | -5.693981  | 0.860500  | 3.495719  |
| O  | -5.608338  | 2.100108  | 4.825084  |
| C  | -6.434776  | 2.155452  | 5.960678  |
| H  | -7.464878  | 1.820911  | 5.754550  |
| H  | -6.053162  | 1.499663  | 6.762536  |
| C  | -6.490768  | 3.590369  | 6.481246  |
| H  | -7.188431  | 3.673222  | 7.322700  |
| H  | -6.875654  | 4.232405  | 5.678286  |
| C  | -5.136904  | 4.140144  | 6.897371  |
| H  | -5.187672  | 5.218033  | 7.066787  |
| H  | -4.388213  | 3.911349  | 6.136419  |
| O  | -4.644446  | 3.513630  | 8.103137  |
| O  | -5.849694  | 4.994184  | 9.314801  |
| C  | -5.053576  | 4.066662  | 9.268219  |
| N  | -4.480870  | 3.467517  | 10.371927 |
| Si | -5.313375  | 4.013752  | 11.886118 |
| Si | -3.056434  | 2.392673  | 10.113556 |
| C  | -4.800902  | 2.951709  | 13.361122 |
| C  | -3.604441  | 0.744232  | 9.389340  |
| C  | -2.166458  | 2.048678  | 11.741033 |
| C  | -4.853932  | 5.799531  | 12.260540 |
| C  | -7.173782  | 3.764105  | 11.723957 |
| C  | -1.780844  | 3.250927  | 9.021581  |
| C  | -9.448170  | 0.668248  | 2.609665  |
| C  | -3.377724  | 1.772733  | 1.938215  |
| C  | -1.943950  | 0.156002  | 3.317098  |
| H  | -0.574780  | -1.526691 | 3.416059  |
| H  | -5.515976  | 2.496922  | 0.613979  |
| H  | -9.639176  | 2.820046  | 2.322438  |
| H  | -10.838428 | 1.022952  | 0.978918  |
| H  | -6.158075  | -2.107358 | 7.253904  |
| H  | -3.681856  | 0.905557  | -0.687262 |
| H  | -2.601054  | -0.155838 | 0.195145  |

|   |            |           |           |
|---|------------|-----------|-----------|
| H | -3.846031  | -0.853836 | -0.864614 |
| H | 0.242094   | 0.023266  | 3.215884  |
| H | -0.583567  | -0.718285 | 1.840049  |
| H | -5.595904  | -1.690064 | 0.095326  |
| H | -4.241559  | 3.373840  | -1.366685 |
| H | -5.786698  | 4.202377  | -1.112567 |
| H | -4.278137  | 4.993657  | -0.659761 |
| H | -0.522006  | 4.397946  | 1.955052  |
| H | -6.680910  | 4.579551  | 1.266395  |
| H | -5.146543  | 5.301981  | 1.778096  |
| H | -5.795388  | 3.914013  | 2.658234  |
| H | -8.616507  | 0.596411  | 1.901162  |
| H | -1.182331  | 1.032594  | 5.163817  |
| H | -2.940951  | 0.870398  | 5.129605  |
| H | -1.919744  | -0.563670 | 5.375959  |
| H | -7.306480  | -2.920849 | 0.594204  |
| H | -8.615598  | -2.106678 | 1.476529  |
| H | -11.151944 | -0.098992 | 4.571414  |
| H | -10.771606 | -1.671255 | 6.437365  |
| H | -5.444490  | -0.895552 | 6.186178  |
| H | -5.775578  | -2.401582 | 4.231792  |
| H | -4.626277  | -2.448418 | 6.432288  |
| H | -5.530593  | -4.567214 | 5.338411  |
| H | -7.074684  | -4.541786 | 4.470368  |
| H | -7.039326  | -4.354545 | 6.227028  |
| H | -10.740508 | -0.678431 | 1.463305  |
| H | -11.627163 | 0.480018  | 2.460245  |
| H | -10.283038 | 2.244533  | 3.868729  |
| H | -8.535758  | 2.374525  | 3.635221  |
| H | -5.359746  | 6.148795  | 13.167961 |
| H | -3.775025  | 5.900898  | 12.421098 |
| H | -5.142513  | 6.449122  | 11.430908 |
| H | -5.459649  | 3.234364  | 14.191628 |
| H | -4.948822  | 1.881406  | 13.186144 |
| H | -3.773397  | 3.110329  | 13.694595 |
| H | -7.658485  | 3.987281  | 12.681690 |
| H | -7.603932  | 4.407026  | 10.955041 |
| H | -7.405412  | 2.722580  | 11.474334 |
| H | -1.239594  | 1.519674  | 11.487164 |
| H | -1.879494  | 2.963622  | 12.268447 |
| H | -2.725618  | 1.412703  | 12.430469 |
| H | -2.746417  | 0.075683  | 9.254824  |
| H | -4.316790  | 0.243530  | 10.053941 |
| H | -4.084855  | 0.885167  | 8.418117  |
| H | -0.849996  | 2.671803  | 9.020265  |
| H | -2.120364  | 3.358029  | 7.990133  |
| H | -1.546167  | 4.248213  | 9.409741  |

$I_{7CC}$

$G = -2759,239195$  u.a.

|    |          |           |           |
|----|----------|-----------|-----------|
| C  | 6.950479 | 0.473376  | 0.880066  |
| C  | 5.559828 | 0.499886  | 1.018599  |
| C  | 4.908480 | 1.761537  | 1.053489  |
| C  | 5.653548 | 2.956921  | 0.958972  |
| C  | 7.045058 | 2.871166  | 0.834127  |
| C  | 7.693829 | 1.645265  | 0.790493  |
| C  | 4.783787 | -0.811360 | 1.108541  |
| C  | 4.359141 | -1.329592 | -0.276345 |
| N  | 3.484404 | 1.791188  | 1.212750  |
| C  | 2.709405 | 1.713145  | 0.122038  |
| C  | 3.316736 | 1.947635  | -1.244482 |
| C  | 5.003240 | 4.332158  | 0.971981  |
| C  | 5.408481 | 5.127265  | 2.220442  |
| Zn | 2.626646 | 1.990194  | 3.000178  |
| N  | 3.316593 | 2.758386  | 4.594668  |
| Si | 2.507644 | 4.196452  | 5.149084  |
| C  | 1.113825 | 3.825353  | 6.377274  |
| N  | 0.777567 | 1.340289  | 2.505953  |
| C  | 0.478293 | 1.145513  | 1.223207  |

|    |           |           |           |
|----|-----------|-----------|-----------|
| C  | 1.336722  | 1.442449  | 0.144056  |
| O  | -0.729780 | -3.583267 | 7.203337  |
| C  | -0.971011 | -3.573065 | 8.381374  |
| O  | -1.686319 | -2.578919 | 8.956088  |
| C  | -2.798012 | -2.809785 | 9.850258  |
| C  | -2.992738 | -4.246931 | 10.302292 |
| C  | -1.850910 | -4.760857 | 11.182924 |
| C  | -0.507831 | -4.322657 | 10.614852 |
| O  | -0.464182 | -4.520203 | 9.194761  |
| C  | -0.168501 | 0.999357  | 3.533760  |
| C  | 0.054408  | -0.175683 | 4.294594  |
| C  | -0.831205 | -0.491459 | 5.328601  |
| C  | -1.914378 | 0.328611  | 5.620442  |
| C  | -2.132430 | 1.471114  | 4.864180  |
| C  | -1.282214 | 1.830679  | 3.811458  |
| C  | 1.182274  | -1.141811 | 3.962014  |
| C  | 0.706490  | -2.201131 | 2.954266  |
| C  | -1.634097 | 3.077716  | 3.007562  |
| C  | -2.987858 | 2.926725  | 2.291285  |
| C  | -0.853630 | 0.558615  | 0.803806  |
| C  | -1.676708 | 4.341122  | 3.879492  |
| C  | 1.788059  | -1.821882 | 5.194754  |
| C  | 5.546239  | -1.922204 | 1.843005  |
| C  | 5.328038  | 5.132789  | -0.298432 |
| Si | 4.582894  | 1.977054  | 5.498450  |
| C  | 4.099023  | 1.698320  | 7.312481  |
| C  | 4.976796  | 0.296738  | 4.734459  |
| C  | 6.222915  | 2.928593  | 5.497066  |
| C  | 3.663111  | 5.419734  | 6.025928  |
| C  | 1.819858  | 5.118718  | 3.639901  |
| H  | 0.873739  | 1.349976  | -0.832452 |
| H  | 2.667254  | 1.568121  | -2.035377 |
| H  | 3.440732  | 3.025453  | -1.399522 |
| H  | 4.304583  | 1.495362  | -1.345118 |
| H  | -1.434241 | 0.184403  | 1.646186  |
| H  | -1.446472 | 1.314491  | 0.279018  |
| H  | -0.684370 | -0.260522 | 0.099040  |
| H  | 7.627265  | 3.786433  | 0.763009  |
| H  | 8.774799  | 1.600167  | 0.688823  |
| H  | 7.463745  | -0.482976 | 0.849643  |
| H  | -0.685098 | -1.398062 | 5.907378  |
| H  | -2.588679 | 0.068062  | 6.431552  |
| H  | -2.988198 | 2.103373  | 5.086976  |
| H  | 1.524371  | -2.882447 | 2.693960  |
| H  | -0.105362 | -2.797533 | 3.384527  |
| H  | 0.338743  | -1.746677 | 2.030143  |
| H  | 2.676972  | -2.392722 | 4.905318  |
| H  | 2.086911  | -1.089065 | 5.950391  |
| H  | 1.091778  | -2.524542 | 5.662189  |
| H  | 3.851351  | -2.295777 | -0.179629 |
| H  | 3.673040  | -0.648068 | -0.782807 |
| H  | 5.234663  | -1.473736 | -0.919904 |
| H  | 6.386467  | -2.300085 | 1.249666  |
| H  | 5.933912  | -1.586389 | 2.807893  |
| H  | 4.878011  | -2.770899 | 2.022749  |
| H  | 4.773637  | 6.077680  | -0.305729 |
| H  | 6.394235  | 5.378524  | -0.353711 |
| H  | 5.072157  | 4.581688  | -1.208554 |
| H  | 4.928154  | 6.112488  | 2.222298  |
| H  | 5.116639  | 4.597937  | 3.130919  |
| H  | 6.491797  | 5.289378  | 2.252061  |
| H  | -3.174403 | 3.789334  | 1.641702  |
| H  | -3.041070 | 2.022644  | 1.680761  |
| H  | -3.807686 | 2.879672  | 3.016540  |
| H  | -1.862235 | 5.224534  | 3.258281  |
| H  | -2.484364 | 4.283587  | 4.617533  |
| H  | -0.742650 | 4.494495  | 4.420053  |
| H  | 1.979862  | -0.568337 | 3.472033  |
| H  | 3.868107  | -0.604081 | 1.674801  |
| H  | -0.859556 | 3.221648  | 2.246471  |

|   |           |           |           |
|---|-----------|-----------|-----------|
| H | 3.918332  | 4.185171  | 1.008140  |
| H | -0.306653 | -3.269652 | 10.837297 |
| H | 0.317284  | -4.919527 | 11.009580 |
| H | -1.899218 | -5.852507 | 11.251115 |
| H | -1.941340 | -4.369693 | 12.203645 |
| H | -3.105722 | -4.889184 | 9.421143  |
| H | -3.945293 | -4.300632 | 10.841230 |
| H | -3.686022 | -2.460191 | 9.313455  |
| H | -2.638995 | -2.146665 | 10.708158 |
| H | 4.889292  | 1.153063  | 7.842240  |
| H | 3.940030  | 2.641288  | 7.847239  |
| H | 3.175723  | 1.114547  | 7.391557  |
| H | 6.975204  | 2.382121  | 6.079154  |
| H | 6.609192  | 3.039039  | 4.478291  |
| H | 6.131636  | 3.928283  | 5.931558  |
| H | 5.750397  | -0.215411 | 5.318749  |
| H | 4.106893  | -0.365541 | 4.691878  |
| H | 5.368706  | 0.426756  | 3.720319  |
| H | 1.214108  | 5.982909  | 3.935328  |
| H | 2.645364  | 5.490856  | 3.024342  |
| H | 1.190024  | 4.487347  | 3.001817  |
| H | 3.095448  | 6.313883  | 6.311342  |
| H | 4.095893  | 5.005687  | 6.942658  |
| H | 4.486213  | 5.740943  | 5.379982  |
| H | 0.539713  | 4.726712  | 6.624249  |
| H | 0.418657  | 3.070899  | 5.996377  |
| H | 1.531774  | 3.436500  | 7.312425  |

### TS(I<sub>7CC</sub>→II<sub>7CC</sub>)

G = -2759,167244 u.a.

|    |           |           |           |
|----|-----------|-----------|-----------|
| C  | 6.955934  | 1.571500  | 1.823966  |
| C  | 5.683128  | 0.987268  | 1.810224  |
| C  | 4.554753  | 1.816282  | 2.032416  |
| C  | 4.723907  | 3.215853  | 2.210156  |
| C  | 6.020057  | 3.739826  | 2.231199  |
| C  | 7.133577  | 2.928803  | 2.046383  |
| C  | 5.594077  | -0.504422 | 1.504832  |
| C  | 6.085518  | -0.829583 | 0.082429  |
| N  | 3.213891  | 1.289430  | 2.003149  |
| C  | 2.655977  | 1.201795  | 0.783105  |
| C  | 3.469922  | 1.430245  | -0.482770 |
| C  | 3.535263  | 4.170112  | 2.274490  |
| C  | 3.789845  | 5.431928  | 3.107207  |
| Zn | 2.103192  | 0.842740  | 3.721181  |
| N  | 2.960151  | 1.151330  | 5.681346  |
| Si | 2.839854  | 2.763207  | 6.422614  |
| C  | 2.383574  | 2.787217  | 8.266557  |
| N  | 0.252117  | 0.666757  | 2.668483  |
| C  | 0.221757  | 0.665234  | 1.338548  |
| C  | 1.326131  | 0.891404  | 0.503588  |
| O  | 1.326761  | -0.649918 | 4.989406  |
| C  | 1.422097  | -0.167368 | 6.142048  |
| O  | 0.573122  | 0.806848  | 6.611907  |
| C  | -0.768950 | 0.377593  | 6.954208  |
| C  | -0.853127 | -0.996698 | 7.598408  |
| C  | 0.081559  | -1.196119 | 8.791536  |
| C  | 1.512898  | -0.750989 | 8.474761  |
| O  | 1.857074  | -1.019445 | 7.108767  |
| C  | -0.990899 | 0.359674  | 3.319714  |
| C  | -1.394576 | -0.988470 | 3.498073  |
| C  | -2.644151 | -1.237680 | 4.077386  |
| C  | -3.496477 | -0.206343 | 4.451918  |
| C  | -3.093507 | 1.110824  | 4.265633  |
| C  | -1.844020 | 1.419720  | 3.715538  |
| C  | -0.580888 | -2.183889 | 3.011397  |
| C  | -1.311431 | -2.928721 | 1.879714  |
| C  | -1.457538 | 2.879403  | 3.515696  |
| C  | -1.934451 | 3.425015  | 2.160130  |
| C  | -1.053114 | 0.402157  | 0.550394  |

|    |           |           |           |
|----|-----------|-----------|-----------|
| C  | -1.970338 | 3.794954  | 4.635204  |
| C  | -0.251230 | -3.182424 | 4.129807  |
| C  | 6.411095  | -1.352400 | 2.490636  |
| C  | 3.079306  | 4.601285  | 0.869235  |
| Si | 4.457686  | 0.237226  | 6.020846  |
| C  | 4.860986  | 0.098217  | 7.872463  |
| C  | 4.319064  | -1.522633 | 5.344342  |
| C  | 6.037513  | 1.022639  | 5.335393  |
| C  | 4.467332  | 3.740318  | 6.368223  |
| C  | 1.508832  | 3.789085  | 5.570895  |
| H  | 1.093567  | 0.848054  | -0.555340 |
| H  | 3.682446  | 0.460918  | -0.944419 |
| H  | 2.882678  | 2.001549  | -1.205592 |
| H  | 4.414071  | 1.944492  | -0.316075 |
| H  | -1.950562 | 0.350300  | 1.163033  |
| H  | -1.185109 | 1.185623  | -0.201598 |
| H  | -0.949033 | -0.540161 | 0.003802  |
| H  | 6.160633  | 4.806387  | 2.376188  |
| H  | 8.132141  | 3.356883  | 2.062599  |
| H  | 7.825764  | 0.941816  | 1.656720  |
| H  | -2.964490 | -2.267463 | 4.214176  |
| H  | -4.470151 | -0.426896 | 4.881547  |
| H  | -3.761533 | 1.916508  | 4.555228  |
| H  | -0.666486 | -3.710543 | 1.463493  |
| H  | -2.218338 | -3.417441 | 2.253848  |
| H  | -1.610974 | -2.266526 | 1.064578  |
| H  | 0.315278  | -4.026300 | 3.719413  |
| H  | 0.354644  | -2.712060 | 4.904680  |
| H  | -1.161496 | -3.594110 | 4.581568  |
| H  | 5.930040  | -1.891647 | -0.137363 |
| H  | 5.579744  | -0.246247 | -0.688306 |
| H  | 7.159037  | -0.630031 | -0.009362 |
| H  | 7.484779  | -1.169664 | 2.370344  |
| H  | 6.150513  | -1.140795 | 3.525918  |
| H  | 6.239054  | -2.418473 | 2.305493  |
| H  | 2.267156  | 5.333049  | 0.945861  |
| H  | 3.905192  | 5.071418  | 0.323329  |
| H  | 2.711402  | 3.763230  | 0.276921  |
| H  | 2.849861  | 5.975359  | 3.248710  |
| H  | 4.200725  | 5.207892  | 4.092966  |
| H  | 4.477481  | 6.117640  | 2.599337  |
| H  | -1.680290 | 4.486968  | 2.066804  |
| H  | -1.473376 | 2.899196  | 1.322411  |
| H  | -3.022145 | 3.330035  | 2.063822  |
| H  | -1.494473 | 4.777894  | 4.561358  |
| H  | -3.051977 | 3.956384  | 4.564772  |
| H  | -1.756124 | 3.391097  | 5.628974  |
| H  | 0.366436  | -1.803620 | 2.618611  |
| H  | 4.542473  | -0.801474 | 1.585438  |
| H  | -0.363643 | 2.924040  | 3.518035  |
| H  | 2.701543  | 3.621678  | 2.726882  |
| H  | 1.654473  | 0.309434  | 8.684601  |
| H  | 2.236450  | -1.320266 | 9.062814  |
| H  | 0.068717  | -2.253900 | 9.076517  |
| H  | -0.269496 | -0.628923 | 9.662745  |
| H  | -0.640787 | -1.756443 | 6.840240  |
| H  | -1.894866 | -1.153823 | 7.901790  |
| H  | -1.384840 | 0.404419  | 6.054228  |
| H  | -1.118177 | 1.154327  | 7.642447  |
| H  | 5.774677  | -0.502632 | 7.963782  |
| H  | 5.079682  | 1.073496  | 8.319743  |
| H  | 4.091102  | -0.388928 | 8.471548  |
| H  | 6.825791  | 0.260307  | 5.308145  |
| H  | 5.933650  | 1.426935  | 4.328345  |
| H  | 6.395200  | 1.826292  | 5.984536  |
| H  | 5.279765  | -2.035752 | 5.470887  |
| H  | 3.555286  | -2.085600 | 5.882344  |
| H  | 4.061224  | -1.559052 | 4.281616  |
| H  | 1.445644  | 4.781477  | 6.032236  |
| H  | 1.688904  | 3.938407  | 4.502512  |

|   |          |          |          |
|---|----------|----------|----------|
| H | 0.540699 | 3.299730 | 5.691862 |
| H | 4.251589 | 4.794736 | 6.580518 |
| H | 5.165779 | 3.395672 | 7.138120 |
| H | 4.981255 | 3.683273 | 5.405857 |
| H | 2.495559 | 3.816637 | 8.629500 |
| H | 1.347041 | 2.486730 | 8.437210 |
| H | 3.037473 | 2.159174 | 8.878884 |

## II<sub>7CC</sub>

G = -2759,234211 u.a.

|    |           |           |           |
|----|-----------|-----------|-----------|
| C  | -3.388559 | -0.266063 | 4.394753  |
| C  | -3.098058 | 1.054004  | 4.070168  |
| C  | -1.992867 | 1.382966  | 3.278897  |
| C  | -1.165494 | 0.336043  | 2.815553  |
| C  | -1.461276 | -1.013243 | 3.115749  |
| C  | -2.575434 | -1.286856 | 3.915617  |
| C  | -1.704219 | 2.842610  | 2.959672  |
| C  | -2.923008 | 3.568215  | 2.372993  |
| N  | 0.011941  | 0.647876  | 2.058051  |
| C  | -0.086239 | 0.686668  | 0.721316  |
| C  | -1.432338 | 0.434765  | 0.081911  |
| C  | -0.601485 | -2.161249 | 2.604229  |
| C  | -1.430050 | -3.245962 | 1.901968  |
| C  | -1.175862 | 3.581128  | 4.197900  |
| C  | 0.241252  | -2.774156 | 3.732456  |
| Zn | 1.718954  | 1.066811  | 2.952963  |
| O  | 2.345536  | 1.701779  | 4.579732  |
| C  | 2.263701  | 1.149798  | 5.815757  |
| O  | 0.991418  | 1.408918  | 6.433100  |
| C  | -0.045259 | 0.467392  | 6.212625  |
| C  | -0.024231 | -0.679514 | 7.238887  |
| C  | 1.375568  | -0.907263 | 7.805689  |
| C  | 2.453941  | -1.127482 | 6.753239  |
| O  | 2.409331  | -0.255280 | 5.625116  |
| N  | 2.864865  | 1.198743  | 1.336801  |
| C  | 2.339078  | 1.160478  | 0.112721  |
| C  | 3.238183  | 1.347456  | -1.086773 |
| C  | 4.282430  | 1.356018  | 1.481506  |
| C  | 4.818506  | 2.643098  | 1.703659  |
| C  | 6.194820  | 2.758236  | 1.921515  |
| C  | 7.024631  | 1.643749  | 1.905140  |
| C  | 6.485140  | 0.386893  | 1.656578  |
| C  | 5.115127  | 0.214287  | 1.437762  |
| C  | 3.950416  | 3.893254  | 1.692488  |
| C  | 3.842420  | 4.520917  | 3.089190  |
| C  | 4.561985  | -1.179530 | 1.166443  |
| C  | 4.479257  | -2.015635 | 2.451804  |
| C  | 4.443924  | 4.925715  | 0.668244  |
| C  | 0.975535  | 0.944920  | -0.155787 |
| C  | 5.361005  | -1.929371 | 0.091205  |
| N  | 3.218615  | 1.734241  | 6.750102  |
| Si | 2.573256  | 3.016890  | 7.819953  |
| C  | 1.644319  | 2.394199  | 9.348807  |
| C  | 4.005215  | 4.041727  | 8.532457  |
| C  | 1.513018  | 4.300071  | 6.927178  |
| Si | 4.963764  | 1.408303  | 6.616788  |
| C  | 5.615525  | 0.749650  | 8.272238  |
| C  | 5.999039  | 2.919620  | 6.137060  |
| C  | 5.364247  | 0.112974  | 5.313113  |
| H  | 8.091444  | 1.754837  | 2.079120  |
| H  | -1.932188 | 3.599642  | 4.991240  |
| H  | -0.279056 | 3.104350  | 4.603398  |
| H  | 7.140504  | -0.479578 | 1.636549  |
| H  | 3.940623  | 0.513090  | -1.178322 |
| H  | 0.709321  | 0.954053  | -1.205459 |
| H  | 2.655604  | 1.410578  | -2.006955 |
| H  | 3.842146  | 2.253208  | -0.985204 |
| H  | -3.322659 | 3.052246  | 1.493806  |
| H  | -0.914884 | 2.866208  | 2.201266  |

|   |           |           |           |
|---|-----------|-----------|-----------|
| H | -3.734894 | 3.655912  | 3.102996  |
| H | -2.646992 | 4.584272  | 2.071464  |
| H | 4.517741  | 4.501382  | -0.338495 |
| H | 3.755140  | 5.776526  | 0.625546  |
| H | 5.431426  | 5.317926  | 0.934543  |
| H | 2.942244  | 3.591674  | 1.389843  |
| H | 6.622749  | 3.740441  | 2.104772  |
| H | -0.927682 | 4.619279  | 3.950754  |
| H | 3.460845  | 3.798715  | 3.816907  |
| H | 4.820360  | 4.875579  | 3.434549  |
| H | 3.168017  | 5.384809  | 3.068562  |
| H | 6.371424  | -2.177606 | 0.433041  |
| H | 5.458867  | -1.343464 | -0.828557 |
| H | 4.863700  | -2.872518 | -0.159780 |
| H | 3.540283  | -1.065057 | 0.790311  |
| H | 3.856903  | -1.532997 | 3.210515  |
| H | 5.473186  | -2.160508 | 2.888868  |
| H | 4.056982  | -3.004356 | 2.238477  |
| H | 0.886986  | -2.027183 | 4.204203  |
| H | 0.877904  | -3.577300 | 3.344875  |
| H | -0.400117 | -3.203210 | 4.510756  |
| H | 0.094235  | -1.750256 | 1.865823  |
| H | -2.812530 | -2.318362 | 4.162913  |
| H | -4.250358 | -0.499383 | 5.014149  |
| H | -2.097198 | -3.763708 | 2.599349  |
| H | -0.769531 | -4.001289 | 1.462707  |
| H | -2.048603 | -2.831650 | 1.099297  |
| H | -1.372149 | 0.526948  | -1.003182 |
| H | -1.799996 | -0.566024 | 0.327290  |
| H | -2.181198 | 1.140003  | 0.454044  |
| H | -3.741143 | 1.848104  | 4.440235  |
| H | 0.019601  | 0.069003  | 5.196914  |
| H | 2.358645  | -2.125347 | 6.310023  |
| H | 3.440839  | -1.072267 | 7.230605  |
| H | -0.980558 | 1.029673  | 6.275757  |
| H | -0.409293 | -1.590198 | 6.763428  |
| H | 1.375826  | -1.780147 | 8.471244  |
| H | -0.701499 | -0.454812 | 8.071724  |
| H | 1.652311  | -0.046343 | 8.416229  |
| H | 6.972654  | 2.572613  | 5.771189  |
| H | 6.183013  | 3.607614  | 6.964896  |
| H | 5.523641  | 3.476229  | 5.324853  |
| H | 4.990806  | 0.417358  | 4.333278  |
| H | 4.965976  | -0.877994 | 5.537363  |
| H | 6.455751  | 0.033270  | 5.244388  |
| H | 4.807843  | 3.476264  | 9.012087  |
| H | 6.705395  | 0.638329  | 8.220083  |
| H | 4.450822  | 4.697110  | 7.779130  |
| H | 3.566539  | 4.688709  | 9.302404  |
| H | 5.196149  | -0.235398 | 8.503636  |
| H | 5.393236  | 1.404971  | 9.119253  |
| H | 1.927930  | 4.529862  | 5.941150  |
| H | 0.487902  | 3.953423  | 6.787174  |
| H | 0.704863  | 1.900550  | 9.089951  |
| H | 2.249668  | 1.700328  | 9.942514  |
| H | 1.408520  | 3.250647  | 9.992362  |
| H | 1.491678  | 5.228968  | 7.509724  |

### TS(II<sub>7CC</sub>→III<sub>7CC</sub>)

G = -2759,217103 u.a.

|   |           |           |          |
|---|-----------|-----------|----------|
| C | -3.507171 | -0.256972 | 4.460011 |
| C | -3.201358 | 1.038407  | 4.063323 |
| C | -2.048150 | 1.322733  | 3.323858 |
| C | -1.180047 | 0.254589  | 2.998794 |
| C | -1.475687 | -1.072510 | 3.400607 |
| C | -2.649497 | -1.300093 | 4.125612 |
| C | -1.769468 | 2.761949  | 2.907348 |
| C | -2.978261 | 3.406463  | 2.211496 |
| N | 0.028780  | 0.503500  | 2.272197 |

|    |           |           |           |
|----|-----------|-----------|-----------|
| C  | -0.062867 | 0.572038  | 0.939383  |
| C  | -1.417661 | 0.472252  | 0.266647  |
| C  | -0.555864 | -2.233829 | 3.039597  |
| C  | -0.839886 | -2.786432 | 1.632478  |
| C  | -1.322766 | 3.624258  | 4.098244  |
| C  | -0.599350 | -3.390212 | 4.045951  |
| Zn | 1.792895  | 0.899093  | 3.209486  |
| O  | 2.043477  | 2.325773  | 4.586805  |
| C  | 2.175700  | 1.765873  | 5.740771  |
| O  | 1.068652  | 1.659758  | 6.569973  |
| C  | -0.063074 | 0.891820  | 6.195006  |
| C  | -0.034659 | -0.457415 | 6.913909  |
| C  | 1.379991  | -1.029155 | 7.033952  |
| C  | 2.158819  | -1.127222 | 5.724732  |
| O  | 2.311792  | 0.105268  | 5.045936  |
| N  | 2.920039  | 1.026699  | 1.545900  |
| C  | 2.377855  | 0.971184  | 0.327698  |
| C  | 3.261840  | 1.105988  | -0.893116 |
| C  | 4.333281  | 1.243510  | 1.636501  |
| C  | 4.822735  | 2.557661  | 1.821832  |
| C  | 6.202669  | 2.735651  | 1.966845  |
| C  | 7.081541  | 1.660453  | 1.913589  |
| C  | 6.588114  | 0.379437  | 1.694709  |
| C  | 5.218280  | 0.143416  | 1.546803  |
| C  | 3.911208  | 3.778395  | 1.795625  |
| C  | 3.998698  | 4.615367  | 3.077578  |
| C  | 4.722415  | -1.276328 | 1.299245  |
| C  | 4.744844  | -2.117510 | 2.583353  |
| C  | 4.203076  | 4.656449  | 0.567369  |
| C  | 1.013767  | 0.775373  | 0.064556  |
| C  | 5.505766  | -1.985264 | 0.185208  |
| N  | 3.240669  | 2.119857  | 6.607839  |
| Si | 2.685956  | 3.089554  | 8.030521  |
| C  | 2.119222  | 2.037067  | 9.493510  |
| C  | 4.113333  | 4.160683  | 8.671284  |
| C  | 1.369790  | 4.354848  | 7.544624  |
| Si | 4.964176  | 1.684784  | 6.460755  |
| C  | 5.499456  | 0.868493  | 8.085642  |
| C  | 6.081915  | 3.161464  | 6.091375  |
| C  | 5.321852  | 0.422037  | 5.129165  |
| H  | 8.149869  | 1.821760  | 2.030027  |
| H  | -2.087565 | 3.633131  | 4.883594  |
| H  | -0.384550 | 3.265818  | 4.529029  |
| H  | 7.281004  | -0.455821 | 1.639080  |
| H  | 3.849983  | 0.193867  | -1.039732 |
| H  | 0.747608  | 0.787178  | -0.985338 |
| H  | 2.661589  | 1.268313  | -1.789689 |
| H  | 3.976049  | 1.925052  | -0.789278 |
| H  | -3.360191 | 2.790079  | 1.391388  |
| H  | -0.941936 | 2.748227  | 2.191096  |
| H  | -3.805733 | 3.572749  | 2.909914  |
| H  | -2.700456 | 4.383504  | 1.802005  |
| H  | 4.105309  | 4.101876  | -0.370986 |
| H  | 3.507197  | 5.501912  | 0.529763  |
| H  | 5.219205  | 5.064873  | 0.605457  |
| H  | 2.880816  | 3.420076  | 1.711616  |
| H  | 6.594447  | 3.739385  | 2.111811  |
| H  | -1.166653 | 4.660074  | 3.776168  |
| H  | 3.704950  | 4.025504  | 3.948504  |
| H  | 5.009651  | 5.009720  | 3.232653  |
| H  | 3.321756  | 5.474563  | 3.009652  |
| H  | 6.539152  | -2.192941 | 0.482948  |
| H  | 5.541723  | -1.389905 | -0.732875 |
| H  | 5.038302  | -2.947006 | -0.052240 |
| H  | 3.678414  | -1.212402 | 0.976724  |
| H  | 4.125004  | -1.667772 | 3.362797  |
| H  | 5.763190  | -2.204139 | 2.978073  |
| H  | 4.371789  | -3.129188 | 2.386194  |
| H  | -0.470237 | -3.050523 | 5.077613  |
| H  | 0.200316  | -4.104267 | 3.823367  |

|   |           |           |           |
|---|-----------|-----------|-----------|
| H | -1.543639 | -3.943106 | 3.989353  |
| H | 0.467235  | -1.837189 | 3.027424  |
| H | -2.897591 | -2.309708 | 4.438346  |
| H | -4.411824 | -0.455886 | 5.028254  |
| H | -1.881347 | -3.117761 | 1.549764  |
| H | -0.196337 | -3.649415 | 1.428053  |
| H | -0.653052 | -2.045952 | 0.852698  |
| H | -1.305835 | 0.187400  | -0.781201 |
| H | -2.082030 | -0.238255 | 0.760034  |
| H | -1.913907 | 1.448312  | 0.294613  |
| H | -3.874580 | 1.849620  | 4.328144  |
| H | -0.086749 | 0.763934  | 5.114355  |
| H | 1.650974  | -1.827354 | 5.046368  |
| H | 3.147340  | -1.562928 | 5.944032  |
| H | -0.948976 | 1.470379  | 6.472948  |
| H | -0.698728 | -1.143017 | 6.374560  |
| H | 1.332732  | -2.035272 | 7.470800  |
| H | -0.451754 | -0.350479 | 7.923047  |
| H | 1.950500  | -0.413405 | 7.735947  |
| H | 7.115310  | 2.802405  | 6.012430  |
| H | 6.062015  | 3.947645  | 6.848044  |
| H | 5.816337  | 3.606094  | 5.128287  |
| H | 4.984359  | 0.743196  | 4.143960  |
| H | 4.877197  | -0.549530 | 5.348701  |
| H | 6.409586  | 0.293473  | 5.078574  |
| H | 5.026840  | 3.633083  | 8.952765  |
| H | 6.562986  | 0.607756  | 8.026085  |
| H | 4.376266  | 4.946190  | 7.956094  |
| H | 3.738764  | 4.660820  | 9.573470  |
| H | 4.941615  | -0.062452 | 8.235772  |
| H | 5.363356  | 1.483400  | 8.978697  |
| H | 1.529295  | 4.698141  | 6.517493  |
| H | 0.358123  | 3.948875  | 7.606056  |
| H | 1.209091  | 1.480747  | 9.257906  |
| H | 2.889138  | 1.319799  | 9.796349  |
| H | 1.911299  | 2.680478  | 10.356783 |
| H | 1.435401  | 5.227791  | 8.204191  |

### III<sub>7CC</sub>

G = -2759,284972 u.a.

|    |           |           |           |
|----|-----------|-----------|-----------|
| C  | -4.171830 | -0.927812 | 2.933966  |
| C  | -3.830940 | 0.375543  | 2.591965  |
| C  | -2.625991 | 0.665253  | 1.944712  |
| C  | -1.747908 | -0.401367 | 1.648971  |
| C  | -2.088482 | -1.733445 | 1.975465  |
| C  | -3.305907 | -1.969064 | 2.620899  |
| C  | -2.280574 | 2.107124  | 1.601034  |
| C  | -3.405735 | 2.812937  | 0.832219  |
| N  | -0.459641 | -0.116793 | 1.091699  |
| C  | -0.266755 | -0.141088 | -0.230873 |
| C  | -1.439893 | -0.447403 | -1.131181 |
| C  | -1.160293 | -2.900537 | 1.669058  |
| C  | -1.874834 | -4.041679 | 0.931675  |
| C  | -1.902293 | 2.898817  | 2.861895  |
| C  | -0.487873 | -3.422318 | 2.947604  |
| Zn | 1.005122  | 0.338905  | 2.306416  |
| O  | 4.200081  | 3.865058  | 6.230594  |
| C  | 3.886675  | 3.231225  | 7.228220  |
| O  | 2.679638  | 2.640823  | 7.363631  |
| C  | 1.751209  | 2.870001  | 6.280219  |
| C  | 0.458607  | 2.145900  | 6.612055  |
| C  | 0.519527  | 0.620681  | 6.453535  |
| C  | 0.203907  | 0.121555  | 5.043482  |
| O  | 1.139935  | 0.599804  | 4.110435  |
| N  | 2.454760  | 0.549243  | 1.008019  |
| C  | 2.227394  | 0.395723  | -0.297293 |
| C  | 3.379792  | 0.541899  | -1.262859 |
| C  | 3.779853  | 0.840585  | 1.474006  |
| C  | 4.206751  | 2.184269  | 1.563963  |

|    |           |           |           |
|----|-----------|-----------|-----------|
| C  | 5.488430  | 2.439586  | 2.058239  |
| C  | 6.327927  | 1.406184  | 2.459389  |
| C  | 5.885857  | 0.091796  | 2.382675  |
| C  | 4.612717  | -0.217957 | 1.894803  |
| C  | 3.283406  | 3.337699  | 1.199069  |
| C  | 2.554701  | 3.846001  | 2.453657  |
| C  | 4.145001  | -1.665406 | 1.879776  |
| C  | 3.856968  | -2.147825 | 3.310582  |
| C  | 3.998900  | 4.489990  | 0.483794  |
| C  | 0.968448  | 0.097575  | -0.855526 |
| C  | 5.131557  | -2.602646 | 1.171336  |
| N  | 4.707075  | 3.030202  | 8.323010  |
| Si | 3.959252  | 2.474617  | 9.864180  |
| C  | 3.551151  | 0.638389  | 9.784605  |
| C  | 5.129331  | 2.750557  | 11.318417 |
| C  | 2.435927  | 3.516020  | 10.255912 |
| Si | 6.417423  | 3.462647  | 7.917942  |
| C  | 7.603875  | 2.844897  | 9.251284  |
| C  | 6.602672  | 5.330374  | 7.781692  |
| C  | 6.941779  | 2.565611  | 6.347292  |
| H  | 7.319708  | 1.627993  | 2.842947  |
| H  | -2.741326 | 2.934726  | 3.565862  |
| H  | -1.050893 | 2.445026  | 3.379273  |
| H  | 6.538446  | -0.711975 | 2.713436  |
| H  | 4.171508  | -0.176346 | -1.027911 |
| H  | 0.954063  | 0.028856  | -1.936456 |
| H  | 3.055101  | 0.383072  | -2.292018 |
| H  | 3.830619  | 1.535914  | -1.184687 |
| H  | -3.696151 | 2.254436  | -0.063519 |
| H  | -1.401677 | 2.089129  | 0.948335  |
| H  | -4.302746 | 2.941218  | 1.447607  |
| H  | -3.081459 | 3.810935  | 0.518339  |
| H  | 4.567901  | 4.140375  | -0.384158 |
| H  | 3.266683  | 5.225853  | 0.134925  |
| H  | 4.691037  | 5.017796  | 1.148162  |
| H  | 2.522285  | 2.952761  | 0.511434  |
| H  | 5.833383  | 3.465908  | 2.139527  |
| H  | -1.633152 | 3.929627  | 2.606001  |
| H  | 1.970165  | 3.050270  | 2.926496  |
| H  | 3.267305  | 4.207402  | 3.202404  |
| H  | 1.874185  | 4.667236  | 2.200279  |
| H  | 6.085034  | -2.670170 | 1.706160  |
| H  | 5.346638  | -2.267167 | 0.151543  |
| H  | 4.718772  | -3.615781 | 1.113734  |
| H  | 3.203681  | -1.704622 | 1.321540  |
| H  | 3.134598  | -1.495997 | 3.812677  |
| H  | 4.772922  | -2.148535 | 3.912208  |
| H  | 3.459852  | -3.169358 | 3.303322  |
| H  | 0.085599  | -2.636308 | 3.448546  |
| H  | 0.195660  | -4.247131 | 2.717430  |
| H  | -1.233367 | -3.791747 | 3.660489  |
| H  | -0.367778 | -2.530865 | 1.010618  |
| H  | -3.578003 | -2.987018 | 2.887398  |
| H  | -5.111406 | -1.132011 | 3.440096  |
| H  | -2.630977 | -4.522698 | 1.561191  |
| H  | -1.154688 | -4.813926 | 0.640722  |
| H  | -2.376378 | -3.687941 | 0.025191  |
| H  | -1.151792 | -0.406796 | -2.182441 |
| H  | -1.845389 | -1.441270 | -0.917832 |
| H  | -2.254345 | 0.263925  | -0.961815 |
| H  | -4.512881 | 1.186656  | 2.833862  |
| H  | 2.185360  | 2.492729  | 5.353138  |
| H  | -0.825978 | 0.434593  | 4.790771  |
| H  | 0.187532  | -0.982472 | 5.073600  |
| H  | 1.596536  | 3.949982  | 6.184007  |
| H  | -0.324845 | 2.548939  | 5.956901  |
| H  | -0.202465 | 0.152366  | 7.135955  |
| H  | 0.166085  | 2.413670  | 7.634897  |
| H  | 1.511444  | 0.257468  | 6.749475  |
| H  | 7.637775  | 5.601457  | 7.544178  |

|   |          |          |           |
|---|----------|----------|-----------|
| H | 6.337821 | 5.822050 | 8.724188  |
| H | 5.951811 | 5.719470 | 6.995388  |
| H | 6.324536 | 2.840312 | 5.491075  |
| H | 6.875227 | 1.480703 | 6.485543  |
| H | 7.987724 | 2.804799 | 6.120598  |
| H | 5.991978 | 2.081562 | 11.327310 |
| H | 8.617137 | 2.973971 | 8.850905  |
| H | 5.489303 | 3.782093 | 11.382935 |
| H | 4.552676 | 2.552650 | 12.230259 |
| H | 7.479941 | 1.778833 | 9.466918  |
| H | 7.554495 | 3.397553 | 10.191723 |
| H | 2.674309 | 4.584100 | 10.204092 |
| H | 1.608378 | 3.318883 | 9.573146  |
| H | 2.845737 | 0.424783 | 8.978003  |
| H | 4.455109 | 0.044430 | 9.611808  |
| H | 3.106409 | 0.301036 | 10.727952 |
| H | 2.098806 | 3.303749 | 11.277181 |

### 3.2 Ring-opening polymerization of cyclic carbonates by metal alkoxide as catalyst

#### (BDI)Zn(OBn)

G = -1811,507656 u.a.

|    |           |           |           |
|----|-----------|-----------|-----------|
| C  | -3.702149 | -0.679292 | -1.779577 |
| C  | -2.699564 | 0.015824  | -2.456234 |
| C  | -2.999723 | 0.604875  | -3.689991 |
| C  | -4.276229 | 0.502716  | -4.236011 |
| C  | -5.274941 | -0.194142 | -3.553647 |
| C  | -4.982152 | -0.783738 | -2.325766 |
| C  | -1.305968 | 0.152118  | -1.871911 |
| O  | -1.163949 | -0.583651 | -0.692948 |
| Zn | 0.396410  | -0.856491 | 0.205916  |
| N  | 2.281444  | -0.447318 | -0.068346 |
| C  | 3.196698  | -0.821455 | 0.831159  |
| C  | 2.904078  | -1.510176 | 2.020445  |
| C  | 1.671024  | -1.965149 | 2.529545  |
| C  | 1.707099  | -2.685254 | 3.856383  |
| N  | 0.498694  | -1.799950 | 1.916285  |
| C  | -0.705618 | -2.313264 | 2.501086  |
| C  | -1.136363 | -3.616901 | 2.170983  |
| C  | -2.341515 | -4.075307 | 2.711033  |
| C  | -3.109262 | -3.274201 | 3.547707  |
| C  | -2.681496 | -1.986527 | 3.847649  |
| C  | -1.483865 | -1.480227 | 3.334131  |
| C  | -0.361909 | -4.499211 | 1.203398  |
| C  | -0.106481 | -5.908933 | 1.752190  |
| C  | -1.085731 | -0.042317 | 3.630524  |
| C  | -1.119868 | 0.290721  | 5.127669  |
| C  | -1.969295 | 0.929219  | 2.830935  |
| C  | -1.083283 | -4.561085 | -0.152636 |
| C  | 2.659955  | 0.255989  | -1.257680 |
| C  | 2.903713  | -0.470467 | -2.444654 |
| C  | 3.156033  | 0.243061  | -3.620298 |
| C  | 3.177126  | 1.632609  | -3.631686 |
| C  | 2.951624  | 2.333305  | -2.452589 |
| C  | 2.693280  | 1.668673  | -1.250167 |
| C  | 2.875195  | -1.991941 | -2.476330 |
| C  | 4.130879  | -2.587602 | -3.127657 |
| C  | 2.425860  | 2.471228  | 0.015461  |
| C  | 3.473730  | 3.566895  | 0.253456  |
| C  | 1.605607  | -2.507332 | -3.170876 |
| C  | 1.011352  | 3.070362  | -0.001461 |
| C  | 4.646645  | -0.491173 | 0.569202  |
| H  | 5.289031  | -0.872851 | 1.363779  |
| H  | 4.974275  | -0.917533 | -0.384011 |
| H  | 4.790759  | 0.591131  | 0.491823  |
| H  | 2.724570  | -2.750197 | 4.244058  |
| H  | 1.081935  | -2.169874 | 4.592168  |
| H  | 1.301325  | -3.696917 | 3.759497  |

|   |           |           |           |
|---|-----------|-----------|-----------|
| H | 3.763008  | -1.730974 | 2.642418  |
| H | 3.336312  | -0.300899 | -4.543723 |
| H | 3.371194  | 2.168409  | -4.556828 |
| H | 2.971882  | 3.419702  | -2.465808 |
| H | -3.294132 | -1.355896 | 4.486465  |
| H | -4.043875 | -3.648640 | 3.956428  |
| H | -2.688676 | -5.074932 | 2.463215  |
| H | -0.749174 | 1.307258  | 5.298431  |
| H | -2.136535 | 0.244115  | 5.532565  |
| H | -0.499254 | -0.397489 | 5.710864  |
| H | -1.640969 | 1.964179  | 2.979953  |
| H | -1.942040 | 0.705786  | 1.759645  |
| H | -3.013911 | 0.859757  | 3.154791  |
| H | 3.305611  | 4.046266  | 1.223753  |
| H | 4.491336  | 3.163034  | 0.247170  |
| H | 3.424235  | 4.352061  | -0.508436 |
| H | 0.814826  | 3.628005  | 0.920959  |
| H | 0.888694  | 3.759204  | -0.844525 |
| H | 0.245323  | 2.294107  | -0.096298 |
| H | 4.118572  | -3.679739 | -3.045528 |
| H | 4.193133  | -2.342448 | -4.193326 |
| H | 5.046173  | -2.222968 | -2.650227 |
| H | 1.579452  | -3.602584 | -3.167044 |
| H | 0.698731  | -2.147079 | -2.674758 |
| H | 1.565918  | -2.174653 | -4.214027 |
| H | 0.519876  | -6.478325 | 1.056937  |
| H | 0.403436  | -5.881961 | 2.720804  |
| H | -1.037551 | -6.470581 | 1.883999  |
| H | -0.499422 | -5.140825 | -0.876559 |
| H | -2.062501 | -5.042370 | -0.050049 |
| H | -1.250736 | -3.560601 | -0.563700 |
| H | -1.118187 | 1.229208  | -1.705989 |
| H | -0.583089 | -0.152433 | -2.649766 |
| H | -0.053709 | 0.093591  | 3.290363  |
| H | 2.478124  | 1.780953  | 0.863686  |
| H | 0.614982  | -4.033450 | 1.036898  |
| H | 2.848140  | -2.343457 | -1.439749 |
| H | -2.224461 | 1.148107  | -4.228659 |
| H | -4.493100 | 0.964787  | -5.196053 |
| H | -6.271965 | -0.276317 | -3.978615 |
| H | -5.754020 | -1.329272 | -1.787969 |
| H | -3.458057 | -1.133731 | -0.825044 |

### (BDI)Zn(OMe)

G = -1580,610511 u.a.

|    |          |           |           |
|----|----------|-----------|-----------|
| Zn | 0.346589 | 0.000217  | 0.369384  |
| N  | 0.354310 | -0.000789 | 2.331910  |
| N  | 2.268983 | 0.000848  | 0.037338  |
| C  | 1.501865 | -0.000906 | 3.009357  |
| C  | 3.139919 | 0.000448  | 1.051727  |
| C  | 2.777315 | -0.000312 | 2.408865  |
| C  | 4.617497 | 0.000859  | 0.738609  |
| C  | 1.463018 | -0.001731 | 4.519465  |
| H  | 5.214766 | 0.000898  | 1.651339  |
| H  | 4.887921 | -0.876048 | 0.141913  |
| H  | 4.887537 | 0.877971  | 0.142044  |
| H  | 2.469159 | -0.000479 | 4.940765  |
| H  | 0.922934 | 0.873543  | 4.893374  |
| H  | 0.925619 | -0.879078 | 4.892421  |
| H  | 3.608666 | -0.000433 | 3.103299  |
| C  | 2.726115 | 0.001667  | -1.319919 |
| C  | 2.907293 | -1.227142 | -1.992980 |
| C  | 3.253766 | -1.198716 | -3.347050 |
| C  | 3.424328 | 0.003210  | -4.024039 |
| C  | 3.252689 | 1.204353  | -3.345960 |
| C  | 2.906174 | 1.231237  | -1.991857 |
| C  | 2.702030 | -2.562038 | -1.291565 |
| H  | 3.388918 | -2.135618 | -3.880753 |
| H  | 3.690932 | 0.003807  | -5.077423 |

|   |           |           |           |
|---|-----------|-----------|-----------|
| H | 3.387044  | 2.141865  | -3.878791 |
| C | 2.699920  | 2.565328  | -1.289210 |
| C | -0.896350 | -0.001582 | 3.032360  |
| C | -1.521937 | 1.226707  | 3.338033  |
| C | -2.761447 | 1.198600  | 3.983706  |
| C | -3.376918 | -0.003049 | 4.313140  |
| C | -2.760336 | -1.203968 | 3.983086  |
| C | -1.520799 | -1.230613 | 3.337408  |
| C | -0.915377 | 2.558495  | 2.923681  |
| H | -3.256928 | 2.135373  | 4.224749  |
| H | -4.340501 | -0.003623 | 4.815477  |
| H | -3.254997 | -2.141309 | 4.223589  |
| C | -0.913136 | -2.561608 | 2.922102  |
| C | -0.872245 | -3.587442 | 4.061610  |
| C | -1.660310 | -3.124309 | 1.701571  |
| C | -0.875265 | 3.583434  | 4.064039  |
| C | -1.663039 | 3.121581  | 1.703649  |
| C | 3.861561  | -3.539415 | -1.526253 |
| C | 1.364760  | -3.196807 | -1.702762 |
| C | 3.859194  | 3.543392  | -1.522299 |
| C | 1.362595  | 3.199955  | -1.700463 |
| H | -0.357375 | 4.492049  | 3.738104  |
| H | -1.880319 | 3.880526  | 4.382059  |
| H | -0.351292 | 3.193049  | 4.942703  |
| H | -1.191447 | 4.046864  | 1.353174  |
| H | -1.679267 | 2.402722  | 0.877988  |
| H | -2.703484 | 3.351759  | 1.960008  |
| H | 3.720217  | 4.445284  | -0.916601 |
| H | 4.823322  | 3.100151  | -1.252707 |
| H | 3.921927  | 3.862093  | -2.568341 |
| H | 1.203145  | 4.146718  | -1.172394 |
| H | 1.342617  | 3.407004  | -2.776291 |
| H | 0.518021  | 2.540980  | -1.474937 |
| H | 3.723647  | -4.441642 | -0.920807 |
| H | 3.923357  | -3.857666 | -2.572489 |
| H | 4.825768  | -3.095844 | -1.257484 |
| H | 1.205893  | -4.144072 | -1.175414 |
| H | 0.520075  | -2.538305 | -1.476293 |
| H | 1.344417  | -3.402954 | -2.778755 |
| H | -0.354258 | -4.495656 | 3.734714  |
| H | -0.347982 | -3.197656 | 4.940370  |
| H | -1.877068 | -3.885064 | 4.379853  |
| H | -1.187637 | -4.048643 | 1.350050  |
| H | -2.700443 | -3.356009 | 1.957813  |
| H | -1.677462 | -2.404596 | 0.876675  |
| O | -1.190278 | 0.000154  | -0.598043 |
| C | -1.284718 | 0.000422  | -1.995043 |
| H | -2.346537 | 0.002288  | -2.284274 |
| H | -0.822810 | 0.884332  | -2.466257 |
| H | -0.825992 | -0.885125 | -2.466259 |
| H | 0.119539  | 2.371302  | 2.618659  |
| H | 2.651081  | 2.368929  | -0.213164 |
| H | 0.121626  | -2.373369 | 2.617199  |
| H | 2.653619  | -2.366796 | -0.215289 |

### 3.2.1 Ring-opening polymerization of 7CC

#### Initiation Step of the 7CC ROP reaction

A<sub>7CC</sub>

G = -2001,353842 u.a.

|   |           |           |          |
|---|-----------|-----------|----------|
| C | -1.801423 | 0.342403  | 3.919145 |
| C | -0.677479 | -0.297112 | 3.348734 |
| C | -0.503635 | -1.698032 | 3.470492 |
| C | -1.479456 | -2.433376 | 4.149068 |
| C | -2.591296 | -1.816735 | 4.711690 |
| C | -2.739666 | -0.440264 | 4.600280 |
| N | 0.259752  | 0.460205  | 2.578352 |
| C | 1.446729  | 0.781009  | 3.096556 |

|    |           |           |           |
|----|-----------|-----------|-----------|
| C  | 1.716154  | 0.512900  | 4.561334  |
| C  | 0.695370  | -2.426580 | 2.872864  |
| C  | 1.358774  | -3.381742 | 3.875639  |
| C  | -1.996176 | 1.850431  | 3.849057  |
| C  | -1.759827 | 2.504043  | 5.219783  |
| C  | 2.519245  | 1.318467  | 2.364878  |
| C  | 2.645606  | 1.588640  | 0.987805  |
| C  | 4.052883  | 1.892546  | 0.518168  |
| N  | 1.645689  | 1.532838  | 0.109798  |
| Zn | -0.129953 | 0.816838  | 0.665674  |
| O  | -1.561985 | 2.562697  | 0.425067  |
| C  | -2.158773 | 2.339874  | -0.621806 |
| O  | -3.463183 | 2.086608  | -0.567707 |
| C  | -4.372363 | 1.950390  | -1.682227 |
| C  | -4.070273 | 2.829647  | -2.883581 |
| C  | -2.945031 | 2.275790  | -3.764149 |
| C  | -1.857052 | 1.640851  | -2.915802 |
| O  | -1.530192 | 2.479494  | -1.786369 |
| C  | 1.867004  | 1.892846  | -1.257405 |
| C  | 2.199049  | 0.898997  | -2.204392 |
| C  | 2.365009  | 1.278778  | -3.541312 |
| C  | 2.220937  | 2.602086  | -3.939404 |
| C  | 1.887284  | 3.569432  | -2.996756 |
| C  | 1.690642  | 3.242170  | -1.652199 |
| C  | 2.379915  | -0.562281 | -1.819925 |
| C  | 3.760830  | -1.095654 | -2.227394 |
| C  | 1.305862  | 4.328637  | -0.654985 |
| C  | 2.531243  | 5.107953  | -0.150377 |
| O  | -1.297799 | -0.150673 | -0.458153 |
| C  | -2.362644 | -0.900297 | 0.059329  |
| C  | 0.274052  | 5.315807  | -1.216625 |
| C  | 1.257846  | -1.435476 | -2.401694 |
| C  | 0.318047  | -3.178410 | 1.587705  |
| C  | -3.376735 | 2.237959  | 3.304414  |
| H  | 1.994089  | -0.534860 | 4.718771  |
| H  | 2.539086  | 1.134199  | 4.920253  |
| H  | 0.831197  | 0.702317  | 5.172233  |
| H  | 4.558293  | 0.949200  | 0.278582  |
| H  | 4.075482  | 2.509488  | -0.380220 |
| H  | 4.630040  | 2.380951  | 1.306558  |
| H  | 3.422082  | 1.484835  | 2.941709  |
| H  | -3.602743 | 0.042029  | 5.051877  |
| H  | -3.335776 | -2.407261 | 5.239115  |
| H  | -1.365409 | -3.510499 | 4.239425  |
| H  | 2.621852  | 0.522815  | -4.279369 |
| H  | 2.367697  | 2.880281  | -4.979985 |
| H  | 1.769127  | 4.601783  | -3.314209 |
| H  | 3.898788  | -2.117659 | -1.857495 |
| H  | 3.877498  | -1.124566 | -3.316436 |
| H  | 4.569686  | -0.476763 | -1.825779 |
| H  | 1.408776  | -2.484638 | -2.121852 |
| H  | 0.281187  | -1.118387 | -2.021756 |
| H  | 1.247795  | -1.384001 | -3.497104 |
| H  | 2.286225  | -3.786131 | 3.455665  |
| H  | 1.603172  | -2.879664 | 4.817416  |
| H  | 0.714473  | -4.234550 | 4.115527  |
| H  | -0.466149 | -3.918978 | 1.782000  |
| H  | -0.046303 | -2.494198 | 0.816555  |
| H  | 1.188395  | -3.709456 | 1.185237  |
| H  | -1.873998 | 3.591642  | 5.150208  |
| H  | -2.479372 | 2.138883  | 5.961700  |
| H  | -0.755703 | 2.297575  | 5.602734  |
| H  | -3.448955 | 3.326686  | 3.208769  |
| H  | -3.548982 | 1.807120  | 2.315816  |
| H  | -4.183249 | 1.912394  | 3.971496  |
| H  | 2.221502  | 5.891788  | 0.550086  |
| H  | 3.247473  | 4.466921  | 0.368314  |
| H  | 3.055087  | 5.591372  | -0.983528 |
| H  | -0.090361 | 5.966033  | -0.414151 |
| H  | 0.706586  | 5.967123  | -1.985047 |

|   |           |           |           |
|---|-----------|-----------|-----------|
| H | -0.580792 | 4.793558  | -1.650897 |
| H | -3.118741 | -0.279521 | 0.569179  |
| H | -2.879982 | -1.431766 | -0.758855 |
| H | -2.051622 | -1.669819 | 0.782225  |
| H | 2.310732  | -0.627935 | -0.729266 |
| H | 1.442001  | -1.676911 | 2.594688  |
| H | 0.845279  | 3.826831  | 0.201370  |
| H | -1.249755 | 2.248328  | 3.155573  |
| H | -2.117043 | 0.655037  | -2.521901 |
| H | -0.915126 | 1.543254  | -3.458048 |
| H | -2.531423 | 3.077256  | -4.385006 |
| H | -3.332247 | 1.510647  | -4.448516 |
| H | -3.820394 | 3.834492  | -2.525494 |
| H | -4.992512 | 2.933036  | -3.466419 |
| H | -5.335073 | 2.219305  | -1.241754 |
| H | -4.411763 | 0.889643  | -1.953713 |

### TS(A<sub>7CC</sub>→B<sub>7CC</sub>)

G = -2001,345352 u.a.

|    |           |           |           |
|----|-----------|-----------|-----------|
| C  | -1.885074 | 0.330201  | 3.711597  |
| C  | -0.728979 | -0.325531 | 3.227252  |
| C  | -0.568722 | -1.722565 | 3.400524  |
| C  | -1.583703 | -2.435981 | 4.045420  |
| C  | -2.724501 | -1.803194 | 4.523704  |
| C  | -2.863129 | -0.430727 | 4.359686  |
| N  | 0.255805  | 0.419029  | 2.503140  |
| C  | 1.409963  | 0.751276  | 3.087868  |
| C  | 1.608020  | 0.478320  | 4.563271  |
| C  | 0.656031  | -2.480641 | 2.901839  |
| C  | 1.319658  | -3.305377 | 4.015239  |
| C  | -2.071990 | 1.835545  | 3.589422  |
| C  | -1.842656 | 2.531995  | 4.939908  |
| C  | 2.513202  | 1.316989  | 2.425271  |
| C  | 2.716406  | 1.615964  | 1.063514  |
| C  | 4.130148  | 1.990485  | 0.677880  |
| N  | 1.772600  | 1.546346  | 0.126243  |
| Zn | -0.038426 | 0.898351  | 0.603008  |
| O  | -1.498444 | 2.386794  | 0.185111  |
| C  | -2.111426 | 1.862681  | -0.764130 |
| O  | -3.396145 | 1.417842  | -0.652142 |
| C  | -4.430817 | 2.372852  | -0.952070 |
| C  | -4.226125 | 3.119861  | -2.265451 |
| C  | -3.754265 | 2.219497  | -3.409292 |
| C  | -2.417071 | 1.522061  | -3.086990 |
| O  | -1.718751 | 2.168206  | -2.013208 |
| C  | 2.072214  | 1.907486  | -1.226920 |
| C  | 2.429422  | 0.903256  | -2.154142 |
| C  | 2.679689  | 1.273557  | -3.479051 |
| C  | 2.587787  | 2.597965  | -3.888674 |
| C  | 2.228085  | 3.574690  | -2.967846 |
| C  | 1.957034  | 3.257888  | -1.633279 |
| C  | 2.530342  | -0.562757 | -1.760814 |
| C  | 3.910277  | -1.156191 | -2.077190 |
| C  | 1.555341  | 4.372820  | -0.676477 |
| C  | 2.692670  | 5.383914  | -0.461944 |
| O  | -1.269085 | 0.037229  | -0.631645 |
| C  | -2.037801 | -1.105084 | -0.351692 |
| C  | 0.287321  | 5.095344  | -1.152303 |
| C  | 1.412549  | -1.385226 | -2.419446 |
| C  | 0.310575  | -3.387128 | 1.711329  |
| C  | -3.444713 | 2.210362  | 3.017751  |
| H  | 2.011946  | -0.527875 | 4.716681  |
| H  | 2.321369  | 1.188035  | 4.987645  |
| H  | 0.669312  | 0.538084  | 5.116771  |
| H  | 4.645453  | 1.106157  | 0.284504  |
| H  | 4.158663  | 2.747699  | -0.106453 |
| H  | 4.691452  | 2.345633  | 1.544078  |
| H  | 3.373760  | 1.496281  | 3.059824  |
| H  | -3.750138 | 0.065686  | 4.743957  |

|   |           |           |           |
|---|-----------|-----------|-----------|
| H | -3.499434 | -2.376536 | 5.025457  |
| H | -1.475681 | -3.509891 | 4.175372  |
| H | 2.955647  | 0.508086  | -4.200258 |
| H | 2.794063  | 2.867901  | -4.921132 |
| H | 2.152095  | 4.609978  | -3.290810 |
| H | 3.974953  | -2.187726 | -1.713482 |
| H | 4.103439  | -1.176939 | -3.155377 |
| H | 4.715703  | -0.580772 | -1.609315 |
| H | 1.466017  | -2.432204 | -2.098866 |
| H | 0.429473  | -0.987298 | -2.149852 |
| H | 1.503583  | -1.367956 | -3.511850 |
| H | 2.261117  | -3.737563 | 3.658903  |
| H | 1.536574  | -2.700058 | 4.900711  |
| H | 0.681675  | -4.136014 | 4.336470  |
| H | -0.440364 | -4.134502 | 1.991132  |
| H | -0.089257 | -2.811064 | 0.873535  |
| H | 1.201567  | -3.921692 | 1.363005  |
| H | -1.956286 | 3.616884  | 4.835887  |
| H | -2.566655 | 2.189106  | 5.688215  |
| H | -0.840341 | 2.337200  | 5.333491  |
| H | -3.496204 | 3.292199  | 2.854033  |
| H | -3.618718 | 1.714521  | 2.060083  |
| H | -4.259243 | 1.944144  | 3.701258  |
| H | 2.386572  | 6.154515  | 0.254386  |
| H | 3.599767  | 4.910685  | -0.074284 |
| H | 2.957071  | 5.888949  | -1.398009 |
| H | -0.021458 | 5.842398  | -0.412304 |
| H | 0.456840  | 5.620441  | -2.099603 |
| H | -0.531540 | 4.387309  | -1.290073 |
| H | -3.037312 | -0.998151 | -0.795529 |
| H | -1.574028 | -2.003836 | -0.788308 |
| H | -2.178818 | -1.283125 | 0.723699  |
| H | 2.388412  | -0.624272 | -0.676954 |
| H | 1.388230  | -1.747703 | 2.549854  |
| H | 1.324964  | 3.914932  | 0.289895  |
| H | -1.319151 | 2.208398  | 2.889475  |
| H | -2.552381 | 0.472736  | -2.818951 |
| H | -1.724751 | 1.575533  | -3.929172 |
| H | -3.650904 | 2.832712  | -4.310803 |
| H | -4.512543 | 1.459291  | -3.631587 |
| H | -3.501856 | 3.928430  | -2.124612 |
| H | -5.177041 | 3.596760  | -2.531296 |
| H | -4.521254 | 3.075727  | -0.114728 |
| H | -5.338208 | 1.763560  | -0.988860 |

### B<sub>7CC</sub>

G = -2001,359938 u.a.

|    |           |           |           |
|----|-----------|-----------|-----------|
| C  | -1.533877 | 0.532548  | 4.076461  |
| C  | -0.654613 | -0.243327 | 3.287542  |
| C  | -0.805276 | -1.645478 | 3.196849  |
| C  | -1.842426 | -2.249522 | 3.914614  |
| C  | -2.713900 | -1.500847 | 4.696272  |
| C  | -2.556835 | -0.121737 | 4.769719  |
| N  | 0.365370  | 0.409169  | 2.519599  |
| C  | 1.581182  | 0.587008  | 3.040485  |
| C  | 1.849705  | 0.121235  | 4.451587  |
| C  | 0.106260  | -2.510664 | 2.337544  |
| C  | 0.822550  | -3.592358 | 3.159987  |
| C  | -1.416884 | 2.047238  | 4.171151  |
| C  | -1.351774 | 2.541214  | 5.623273  |
| C  | 2.653540  | 1.195757  | 2.362213  |
| C  | 2.734487  | 1.691808  | 1.049984  |
| C  | 4.071567  | 2.245120  | 0.617731  |
| N  | 1.721037  | 1.699068  | 0.177339  |
| Zn | -0.055036 | 1.102801  | 0.728622  |
| O  | -1.779276 | 1.474820  | 0.136269  |
| C  | -2.354374 | 0.623378  | -0.730653 |
| O  | -3.543994 | 1.129381  | -1.266872 |
| C  | -3.454985 | 2.376931  | -1.943452 |

|   |           |           |           |
|---|-----------|-----------|-----------|
| C | -2.501710 | 2.348470  | -3.140756 |
| C | -2.508633 | 1.001384  | -3.868280 |
| C | -2.019436 | -0.156204 | -2.963545 |
| O | -1.426428 | 0.317309  | -1.755056 |
| C | 1.926309  | 2.175683  | -1.159684 |
| C | 2.389117  | 1.284206  | -2.153223 |
| C | 2.490496  | 1.750198  | -3.467164 |
| C | 2.153677  | 3.056867  | -3.799813 |
| C | 1.718947  | 3.927533  | -2.807518 |
| C | 1.602687  | 3.513457  | -1.476899 |
| C | 2.755947  | -0.159882 | -1.841380 |
| C | 4.163129  | -0.526174 | -2.335063 |
| C | 1.131501  | 4.502059  | -0.419594 |
| C | 1.951020  | 5.799948  | -0.430140 |
| O | -2.695782 | -0.621812 | -0.169964 |
| C | -3.693187 | -0.573712 | 0.839255  |
| C | -0.367939 | 4.800863  | -0.565375 |
| C | 1.714243  | -1.132193 | -2.413570 |
| C | -0.664582 | -3.145613 | 1.170030  |
| C | -2.561709 | 2.736360  | 3.411829  |
| H | 1.665036  | -0.952342 | 4.548435  |
| H | 2.879142  | 0.328254  | 4.746857  |
| H | 1.174659  | 0.616370  | 5.156328  |
| H | 4.516676  | 1.617910  | -0.161034 |
| H | 3.959655  | 3.244489  | 0.187768  |
| H | 4.765530  | 2.295832  | 1.457838  |
| H | 3.568597  | 1.276211  | 2.936208  |
| H | -3.243653 | 0.462298  | 5.376622  |
| H | -3.514537 | -1.989812 | 5.244724  |
| H | -1.969423 | -3.327483 | 3.854763  |
| H | 2.835976  | 1.073198  | -4.244192 |
| H | 2.235414  | 3.397614  | -4.828433 |
| H | 1.465436  | 4.951574  | -3.068846 |
| H | 4.426507  | -1.538519 | -2.010014 |
| H | 4.226160  | -0.508963 | -3.428519 |
| H | 4.925163  | 0.160266  | -1.951688 |
| H | 1.962851  | -2.165164 | -2.144784 |
| H | 0.713101  | -0.905371 | -2.037343 |
| H | 1.685553  | -1.070421 | -3.507711 |
| H | 1.519415  | -4.151825 | 2.526443  |
| H | 1.392927  | -3.167273 | 3.992240  |
| H | 0.112603  | -4.312435 | 3.581550  |
| H | -1.426310 | -3.843293 | 1.537561  |
| H | -1.168677 | -2.390625 | 0.559912  |
| H | 0.018091  | -3.713770 | 0.527786  |
| H | -1.178733 | 3.622587  | 5.647788  |
| H | -2.287185 | 2.349627  | 6.160372  |
| H | -0.544720 | 2.057912  | 6.183686  |
| H | -2.447468 | 3.825783  | 3.453188  |
| H | -2.585568 | 2.431696  | 2.361095  |
| H | -3.530991 | 2.487410  | 3.859153  |
| H | 1.650247  | 6.444644  | 0.402815  |
| H | 3.024028  | 5.603831  | -0.335105 |
| H | 1.799007  | 6.369293  | -1.353445 |
| H | -0.700242 | 5.493614  | 0.216238  |
| H | -0.580431 | 5.264935  | -1.535304 |
| H | -0.964877 | 3.886795  | -0.489231 |
| H | -4.652702 | -0.241490 | 0.429848  |
| H | -3.788715 | -1.591446 | 1.222541  |
| H | -3.395994 | 0.087058  | 1.660147  |
| H | 2.748423  | -0.278386 | -0.753228 |
| H | 0.875690  | -1.859952 | 1.909554  |
| H | 1.279333  | 4.033766  | 0.559271  |
| H | -0.478912 | 2.338829  | 3.687195  |
| H | -2.836373 | -0.840485 | -2.716500 |
| H | -1.234369 | -0.732465 | -3.460819 |
| H | -1.865582 | 1.081968  | -4.752261 |
| H | -3.517796 | 0.775827  | -4.234224 |
| H | -1.481852 | 2.567029  | -2.812780 |
| H | -2.791818 | 3.147229  | -3.834995 |

|   |           |          |           |
|---|-----------|----------|-----------|
| H | -3.175807 | 3.171107 | -1.240183 |
| H | -4.480643 | 2.564240 | -2.279027 |

TS(B<sub>7CC</sub>→C<sub>7CC</sub>)

G = -2001,34812 u.a.

|    |           |           |           |
|----|-----------|-----------|-----------|
| C  | 1.529006  | 3.601153  | -1.580094 |
| C  | 1.876745  | 2.265948  | -1.266754 |
| C  | 2.399829  | 1.404404  | -2.261622 |
| C  | 2.486476  | 1.877194  | -3.574634 |
| C  | 2.100061  | 3.171226  | -3.905516 |
| C  | 1.644207  | 4.024860  | -2.908476 |
| N  | 1.647549  | 1.760430  | 0.052285  |
| Zn | -0.141152 | 1.063607  | 0.554209  |
| O  | -1.801684 | 2.266627  | 0.394944  |
| C  | -2.673505 | 1.390998  | 0.094489  |
| O  | -3.267769 | 0.772133  | 1.134195  |
| C  | -4.200553 | -0.269405 | 0.874346  |
| C  | 2.902640  | 0.001092  | -1.940525 |
| C  | 1.980866  | -1.092570 | -2.495421 |
| C  | 1.089351  | 4.601072  | -0.517482 |
| C  | -0.327706 | 5.138013  | -0.760180 |
| C  | 2.646840  | 1.749406  | 0.941928  |
| C  | 3.981772  | 2.341089  | 0.550091  |
| C  | 2.569761  | 1.200573  | 2.229810  |
| C  | 1.508159  | 0.549300  | 2.890743  |
| C  | 1.817260  | 0.047894  | 4.283770  |
| N  | 0.290727  | 0.376416  | 2.381785  |
| C  | -0.714115 | -0.288441 | 3.158613  |
| C  | -1.505883 | 0.446504  | 4.071019  |
| C  | -2.521069 | -0.225189 | 4.759038  |
| C  | -2.752602 | -1.582785 | 4.572184  |
| C  | -1.955901 | -2.295531 | 3.684179  |
| C  | -0.931464 | -1.671896 | 2.965523  |
| C  | -1.295025 | 1.930885  | 4.339442  |
| C  | -2.483113 | 2.774774  | 3.854858  |
| C  | -0.073111 | -2.508006 | 2.026407  |
| C  | -0.909043 | -3.138092 | 0.904656  |
| C  | 0.715167  | -3.585023 | 2.786752  |
| C  | -1.024145 | 2.208283  | 5.826848  |
| O  | -3.519427 | 1.524270  | -0.948594 |
| C  | -3.110172 | 2.332925  | -2.062462 |
| C  | -1.747770 | 1.991042  | -2.646313 |
| C  | -1.485242 | 0.516444  | -2.957928 |
| C  | -1.793825 | -0.440471 | -1.795573 |
| O  | -1.520615 | 0.054940  | -0.507915 |
| C  | 4.339645  | -0.216950 | -2.438843 |
| C  | 2.087281  | 5.765443  | -0.408863 |
| H  | 1.362766  | -0.927191 | 4.470474  |
| H  | 2.894803  | -0.022710 | 4.441627  |
| H  | 1.410668  | 0.735686  | 5.032406  |
| H  | 4.637817  | 2.433043  | 1.416895  |
| H  | 4.482183  | 1.710542  | -0.191815 |
| H  | 3.858983  | 3.325589  | 0.092554  |
| H  | 3.482991  | 1.274050  | 2.808106  |
| H  | -3.142226 | 0.329962  | 5.457626  |
| H  | -3.544370 | -2.084323 | 5.122673  |
| H  | -2.127296 | -3.360605 | 3.547749  |
| H  | 2.873301  | 1.221237  | -4.350527 |
| H  | 2.174193  | 3.518509  | -4.932580 |
| H  | 1.374929  | 5.047089  | -3.162329 |
| H  | 4.721204  | -1.181229 | -2.085980 |
| H  | 4.391703  | -0.226689 | -3.532927 |
| H  | 5.018977  | 0.565782  | -2.086583 |
| H  | 2.382191  | -2.086038 | -2.265584 |
| H  | 0.980949  | -1.026018 | -2.060138 |
| H  | 1.883652  | -1.015278 | -3.584341 |
| H  | 1.364787  | -4.140259 | 2.100817  |
| H  | 1.345308  | -3.151411 | 3.569509  |
| H  | 0.044382  | -4.307727 | 3.264768  |

|   |           |           |           |
|---|-----------|-----------|-----------|
| H | -1.656091 | -3.833895 | 1.303372  |
| H | -1.427904 | -2.362545 | 0.336060  |
| H | -0.266913 | -3.702520 | 0.218553  |
| H | -0.768369 | 3.263064  | 5.976057  |
| H | -1.907374 | 1.997243  | 6.439991  |
| H | -0.202466 | 1.601680  | 6.220837  |
| H | -2.298734 | 3.836348  | 4.057047  |
| H | -2.645536 | 2.648133  | 2.783434  |
| H | -3.403837 | 2.492547  | 4.378621  |
| H | 1.806216  | 6.430544  | 0.414958  |
| H | 3.108788  | 5.417399  | -0.225999 |
| H | 2.103777  | 6.364603  | -1.326137 |
| H | -0.585137 | 5.879418  | 0.004491  |
| H | -0.407613 | 5.629688  | -1.736614 |
| H | -1.066338 | 4.335242  | -0.704686 |
| H | -3.709069 | -1.094975 | 0.352759  |
| H | -4.536212 | -0.609917 | 1.854102  |
| H | -5.049853 | 0.093290  | 0.288857  |
| H | 2.910265  | -0.108824 | -0.851788 |
| H | 0.653381  | -1.837230 | 1.557220  |
| H | 1.081183  | 4.079109  | 0.444517  |
| H | -0.414869 | 2.252039  | 3.773478  |
| H | -2.863334 | -0.692108 | -1.832199 |
| H | -1.249045 | -1.384792 | -1.945664 |
| H | -0.432836 | 0.432384  | -3.250140 |
| H | -2.075779 | 0.190412  | -3.825574 |
| H | -0.974633 | 2.353311  | -1.967219 |
| H | -1.636759 | 2.581890  | -3.564193 |
| H | -3.130716 | 3.385283  | -1.756658 |
| H | -3.907314 | 2.171679  | -2.794690 |

### C<sub>7CC</sub>

G = -2001,357138 u.a.

|    |           |           |           |
|----|-----------|-----------|-----------|
| C  | 1.521876  | 3.598898  | -1.610670 |
| C  | 1.879569  | 2.268793  | -1.287344 |
| C  | 2.425366  | 1.408895  | -2.271699 |
| C  | 2.518091  | 1.874660  | -3.586662 |
| C  | 2.117871  | 3.161765  | -3.928706 |
| C  | 1.644508  | 4.016219  | -2.940599 |
| N  | 1.639898  | 1.759080  | 0.028170  |
| Zn | -0.070313 | 0.830884  | 0.422363  |
| O  | -1.902992 | 2.322297  | 0.449436  |
| C  | -2.861656 | 1.577338  | 0.252315  |
| O  | -3.359337 | 0.851502  | 1.238921  |
| C  | -4.304535 | -0.183319 | 0.947861  |
| C  | 2.945774  | 0.016312  | -1.931979 |
| C  | 2.020071  | -1.097018 | -2.440296 |
| C  | 1.067922  | 4.602989  | -0.557248 |
| C  | -0.347552 | 5.138525  | -0.813267 |
| C  | 2.620352  | 1.790294  | 0.938613  |
| C  | 3.937032  | 2.435293  | 0.570497  |
| C  | 2.541177  | 1.236032  | 2.222917  |
| C  | 1.486556  | 0.558308  | 2.869281  |
| C  | 1.791861  | 0.083443  | 4.272972  |
| N  | 0.288202  | 0.337736  | 2.336003  |
| C  | -0.730235 | -0.306663 | 3.111279  |
| C  | -1.495175 | 0.437756  | 4.041073  |
| C  | -2.540505 | -0.208191 | 4.708648  |
| C  | -2.824264 | -1.551330 | 4.491738  |
| C  | -2.044241 | -2.277590 | 3.599700  |
| C  | -0.991881 | -1.680479 | 2.899003  |
| C  | -1.221142 | 1.902147  | 4.363196  |
| C  | -2.355489 | 2.824062  | 3.893732  |
| C  | -0.131566 | -2.542775 | 1.985690  |
| C  | -0.955653 | -3.244598 | 0.899665  |
| C  | 0.684282  | -3.560835 | 2.798368  |
| C  | -0.968174 | 2.112335  | 5.865452  |
| O  | -3.559888 | 1.487830  | -0.870145 |
| C  | -3.134879 | 2.264247  | -2.016014 |

|   |           |           |           |
|---|-----------|-----------|-----------|
| C | -1.732605 | 1.977348  | -2.524677 |
| C | -1.396295 | 0.542820  | -2.929218 |
| C | -1.642504 | -0.532768 | -1.859377 |
| O | -1.254901 | -0.243387 | -0.555996 |
| C | 4.375749  | -0.199812 | -2.450051 |
| C | 2.057065  | 5.775578  | -0.450483 |
| H | 1.261029  | -0.839415 | 4.513289  |
| H | 2.864784  | -0.076911 | 4.396923  |
| H | 1.482125  | 0.836363  | 5.005057  |
| H | 4.599167  | 2.497062  | 1.435281  |
| H | 4.443972  | 1.861554  | -0.211978 |
| H | 3.784709  | 3.440547  | 0.170535  |
| H | 3.441412  | 1.338064  | 2.817448  |
| H | -3.142009 | 0.355134  | 5.417870  |
| H | -3.637853 | -2.033198 | 5.028028  |
| H | -2.247980 | -3.334752 | 3.448698  |
| H | 2.920400  | 1.219290  | -4.354928 |
| H | 2.196486  | 3.503798  | -4.957238 |
| H | 1.367629  | 5.034366  | -3.202983 |
| H | 4.771511  | -1.151735 | -2.079838 |
| H | 4.410983  | -0.237235 | -3.544230 |
| H | 5.053056  | 0.597404  | -2.126776 |
| H | 2.442801  | -2.080927 | -2.207008 |
| H | 1.033814  | -1.036837 | -1.973647 |
| H | 1.890274  | -1.038633 | -3.527142 |
| H | 1.340542  | -4.139721 | 2.138813  |
| H | 1.310491  | -3.073353 | 3.552324  |
| H | 0.029205  | -4.268345 | 3.319340  |
| H | -1.696684 | -3.928118 | 1.329656  |
| H | -1.465651 | -2.500970 | 0.283110  |
| H | -0.299846 | -3.838744 | 0.252863  |
| H | -0.645425 | 3.141809  | 6.056251  |
| H | -1.878859 | 1.943364  | 6.450803  |
| H | -0.201158 | 1.436911  | 6.256919  |
| H | -2.134800 | 3.862489  | 4.167168  |
| H | -2.480855 | 2.772306  | 2.811783  |
| H | -3.306033 | 2.550893  | 4.366038  |
| H | 1.771547  | 6.440023  | 0.372404  |
| H | 3.082188  | 5.438126  | -0.269168 |
| H | 2.067337  | 6.372922  | -1.369070 |
| H | -0.607598 | 5.889326  | -0.058667 |
| H | -0.422519 | 5.618506  | -1.795824 |
| H | -1.089410 | 4.339878  | -0.753019 |
| H | -3.848900 | -0.912380 | 0.275736  |
| H | -4.520346 | -0.644622 | 1.910519  |
| H | -5.214450 | 0.228769  | 0.504977  |
| H | 2.977112  | -0.068221 | -0.841258 |
| H | 0.577461  | -1.881739 | 1.478055  |
| H | 1.052894  | 4.085968  | 0.407382  |
| H | -0.317339 | 2.203139  | 3.824621  |
| H | -2.726609 | -0.748819 | -1.856294 |
| H | -1.161612 | -1.461117 | -2.221779 |
| H | -0.339996 | 0.540996  | -3.223110 |
| H | -1.966348 | 0.254117  | -3.824711 |
| H | -1.011823 | 2.324246  | -1.783798 |
| H | -1.592687 | 2.633584  | -3.393789 |
| H | -3.231242 | 3.323674  | -1.754861 |
| H | -3.891648 | 2.020118  | -2.766462 |

TS(C<sub>7CC</sub>→D<sub>7CC</sub>)

G = -2001,355029 u.a.

|   |           |           |          |
|---|-----------|-----------|----------|
| C | -0.984944 | -1.681132 | 2.903999 |
| C | -0.722004 | -0.307649 | 3.112491 |
| C | -1.493701 | 0.445953  | 4.028263 |
| C | -2.542237 | -0.195585 | 4.695203 |
| C | -2.824625 | -1.540014 | 4.486288 |
| C | -2.041828 | -2.272772 | 3.601966 |
| N | 0.309058  | 0.327846  | 2.345190 |
| C | 1.499649  | 0.565125  | 2.886255 |

|    |           |           |           |
|----|-----------|-----------|-----------|
| C  | 1.812480  | 0.114427  | 4.296647  |
| C  | -1.218487 | 1.911575  | 4.341607  |
| C  | -0.899161 | 2.115222  | 5.831972  |
| C  | -0.120500 | -2.547894 | 1.999490  |
| C  | 0.701308  | -3.551827 | 2.823448  |
| C  | 2.555132  | 1.239717  | 2.235993  |
| C  | 2.636947  | 1.781900  | 0.948691  |
| C  | 3.939260  | 2.456816  | 0.586919  |
| N  | 1.663783  | 1.724184  | 0.028417  |
| Zn | -0.014114 | 0.763780  | 0.419106  |
| O  | -1.327670 | -0.170403 | -0.486924 |
| C  | -1.647827 | -0.500728 | -1.802238 |
| C  | -1.395798 | 0.570861  | -2.872860 |
| C  | -1.791514 | 1.995563  | -2.488385 |
| C  | -3.226274 | 2.239673  | -2.050963 |
| O  | -3.668298 | 1.459611  | -0.918921 |
| C  | -3.046553 | 1.652042  | 0.243655  |
| O  | -3.544901 | 0.911084  | 1.225554  |
| C  | -4.392474 | -0.196898 | 0.912855  |
| C  | 1.895971  | 2.244679  | -1.286085 |
| C  | 1.537863  | 3.577629  | -1.597968 |
| C  | 1.648250  | 4.001193  | -2.926953 |
| C  | 2.115467  | 3.153701  | -3.923933 |
| C  | 2.520462  | 1.865760  | -3.592448 |
| C  | 2.434805  | 1.391604  | -2.279903 |
| C  | 1.100715  | 4.581917  | -0.537147 |
| C  | 2.082711  | 5.763712  | -0.462141 |
| C  | 2.960562  | -0.002786 | -1.957038 |
| C  | 4.417267  | -0.178015 | -2.413731 |
| O  | -2.172180 | 2.475711  | 0.461941  |
| C  | 2.082818  | -1.112830 | -2.550244 |
| C  | -0.324442 | 5.108283  | -0.758029 |
| C  | -2.380401 | 2.824037  | 3.924763  |
| C  | -0.940701 | -3.263069 | 0.919271  |
| H  | 1.100514  | -0.625290 | 4.662829  |
| H  | 2.820906  | -0.306160 | 4.336052  |
| H  | 1.792065  | 0.971751  | 4.977663  |
| H  | 4.625181  | 2.467715  | 1.434996  |
| H  | 4.426381  | 1.945094  | -0.248448 |
| H  | 3.766328  | 3.486356  | 0.263376  |
| H  | 3.449211  | 1.356439  | 2.837928  |
| H  | -3.147306 | 0.373194  | 5.396869  |
| H  | -3.641213 | -2.017874 | 5.021486  |
| H  | -2.246929 | -3.330268 | 3.455744  |
| H  | 2.919422  | 1.215293  | -4.366823 |
| H  | 2.185523  | 3.502201  | -4.950873 |
| H  | 1.367904  | 5.020305  | -3.181333 |
| H  | 4.807607  | -1.142817 | -2.072050 |
| H  | 4.503957  | -0.158552 | -3.505494 |
| H  | 5.068061  | 0.608794  | -2.019114 |
| H  | 2.504749  | -2.097969 | -2.321414 |
| H  | 1.068922  | -1.080184 | -2.144022 |
| H  | 2.013572  | -1.024491 | -3.640400 |
| H  | 1.360702  | -4.135694 | 2.171405  |
| H  | 1.323694  | -3.049567 | 3.570838  |
| H  | 0.049891  | -4.255604 | 3.353841  |
| H  | -1.668585 | -3.956768 | 1.354882  |
| H  | -1.470711 | -2.530392 | 0.306287  |
| H  | -0.281145 | -3.848517 | 0.268419  |
| H  | -0.593436 | 3.150955  | 6.017375  |
| H  | -1.777484 | 1.918005  | 6.456661  |
| H  | -0.097725 | 1.456180  | 6.178922  |
| H  | -2.149822 | 3.865054  | 4.179522  |
| H  | -2.561309 | 2.763808  | 2.850832  |
| H  | -3.304195 | 2.552331  | 4.448267  |
| H  | 1.822264  | 6.420279  | 0.375121  |
| H  | 3.118395  | 5.437423  | -0.324947 |
| H  | 2.049768  | 6.366835  | -1.376307 |
| H  | -0.561750 | 5.870958  | -0.007818 |
| H  | -0.427735 | 5.573961  | -1.744998 |

|   |           |           |           |
|---|-----------|-----------|-----------|
| H | -1.066801 | 4.313576  | -0.662724 |
| H | -3.847341 | -0.911955 | 0.294261  |
| H | -4.636627 | -0.646515 | 1.874778  |
| H | -5.301571 | 0.132124  | 0.403063  |
| H | 2.941565  | -0.121617 | -0.869118 |
| H | 0.587984  | -1.889510 | 1.487003  |
| H | 1.115634  | 4.070389  | 0.430462  |
| H | -0.341899 | 2.221413  | 3.764453  |
| H | -2.722093 | -0.751845 | -1.830205 |
| H | -1.122259 | -1.418565 | -2.125763 |
| H | -0.329498 | 0.598421  | -3.128087 |
| H | -1.923270 | 0.258607  | -3.786218 |
| H | -1.123698 | 2.357861  | -1.706009 |
| H | -1.620552 | 2.655766  | -3.348734 |
| H | -3.367280 | 3.298573  | -1.808289 |
| H | -3.937022 | 1.962881  | -2.834865 |

### D<sub>7CC</sub>

G = -2001,375211 u.a.

|    |           |           |           |
|----|-----------|-----------|-----------|
| C  | 3.017472  | 1.146274  | -2.222447 |
| C  | 2.830925  | 2.038903  | -1.143559 |
| C  | 3.021036  | 3.429311  | -1.309131 |
| C  | 3.383680  | 3.903990  | -2.573211 |
| C  | 3.562452  | 3.038659  | -3.646251 |
| C  | 3.382537  | 1.672425  | -3.465176 |
| N  | 2.357100  | 1.539240  | 0.112473  |
| Zn | 0.430795  | 1.472884  | 0.421038  |
| O  | -1.058395 | 1.970856  | -0.501181 |
| C  | -1.088582 | 2.382627  | -1.842681 |
| C  | -2.340038 | 3.222590  | -2.108999 |
| C  | -3.657864 | 2.531239  | -1.748201 |
| C  | -3.960080 | 1.332113  | -2.630561 |
| O  | -5.201691 | 0.701178  | -2.246663 |
| C  | -6.312965 | 1.226495  | -2.787443 |
| O  | -6.359676 | 2.132639  | -3.582239 |
| C  | 2.813252  | 4.409757  | -0.163714 |
| C  | 1.491930  | 5.176564  | -0.328142 |
| C  | 2.797168  | -0.352167 | -2.071370 |
| C  | 1.476571  | -0.780518 | -2.729053 |
| C  | 3.214419  | 1.148606  | 1.060254  |
| C  | 4.695402  | 1.236104  | 0.779244  |
| C  | 2.832668  | 0.657907  | 2.320597  |
| C  | 1.550303  | 0.461911  | 2.870154  |
| C  | 1.490402  | -0.093931 | 4.273157  |
| N  | 0.410104  | 0.732587  | 2.233026  |
| C  | -0.849986 | 0.482728  | 2.869251  |
| C  | -1.466508 | -0.778887 | 2.717395  |
| C  | -2.717914 | -0.982366 | 3.305916  |
| C  | -3.353619 | 0.027345  | 4.018638  |
| C  | -2.742996 | 1.269340  | 4.142936  |
| C  | -1.490987 | 1.524018  | 3.575051  |
| C  | -0.835357 | -1.886187 | 1.886405  |
| C  | -1.558601 | -2.015094 | 0.536358  |
| C  | -0.883482 | 2.914262  | 3.686009  |
| C  | -1.634272 | 3.899492  | 2.775639  |
| C  | -0.834739 | 3.428815  | 5.130587  |
| C  | -0.795514 | -3.235361 | 2.615656  |
| O  | -7.421346 | 0.613219  | -2.347016 |
| C  | -7.304264 | -0.448274 | -1.399370 |
| C  | 3.988045  | 5.383727  | -0.000418 |
| C  | 3.967934  | -1.180642 | -2.617169 |
| H  | 0.976456  | -1.060283 | 4.285207  |
| H  | 2.490152  | -0.224887 | 4.689197  |
| H  | 0.918331  | 0.569401  | 4.928792  |
| H  | 5.280936  | 0.890200  | 1.632005  |
| H  | 4.960282  | 0.634883  | -0.096056 |
| H  | 4.985615  | 2.265790  | 0.547969  |
| H  | 3.654255  | 0.387983  | 2.972881  |
| H  | -3.250913 | 2.061229  | 4.687079  |

|   |           |           |           |
|---|-----------|-----------|-----------|
| H | -4.326443 | -0.150768 | 4.468875  |
| H | -3.206420 | -1.947205 | 3.197339  |
| H | 3.523747  | 0.999725  | -4.306975 |
| H | 3.842087  | 3.428309  | -4.621209 |
| H | 3.526095  | 4.971354  | -2.719980 |
| H | 3.814173  | -2.242869 | -2.398800 |
| H | 4.065759  | -1.083851 | -3.703691 |
| H | 4.920990  | -0.878569 | -2.171099 |
| H | 1.304079  | -1.853672 | -2.590807 |
| H | 0.623791  | -0.241761 | -2.303940 |
| H | 1.491065  | -0.577570 | -3.805640 |
| H | -0.254157 | -3.974886 | 2.015763  |
| H | -0.295508 | -3.157460 | 3.586564  |
| H | -1.800124 | -3.634269 | 2.792195  |
| H | -2.600863 | -2.320514 | 0.682062  |
| H | -1.567992 | -1.062569 | -0.002931 |
| H | -1.072668 | -2.767368 | -0.095325 |
| H | -0.319861 | 4.394763  | 5.171488  |
| H | -1.838004 | 3.578043  | 5.543637  |
| H | -0.304164 | 2.735334  | 5.791251  |
| H | -1.166502 | 4.890092  | 2.809551  |
| H | -1.643912 | 3.555012  | 1.736677  |
| H | -2.675717 | 4.010414  | 3.098397  |
| H | 3.845731  | 6.001251  | 0.892879  |
| H | 4.941429  | 4.855334  | 0.102037  |
| H | 4.076025  | 6.063789  | -0.854344 |
| H | 1.336508  | 5.863906  | 0.510913  |
| H | 1.494926  | 5.767839  | -1.250601 |
| H | 0.634003  | 4.498022  | -0.371666 |
| H | -6.827702 | -0.105992 | -0.476957 |
| H | -8.327530 | -0.765833 | -1.194305 |
| H | -6.730388 | -1.284026 | -1.808856 |
| H | 2.714854  | -0.569096 | -1.001349 |
| H | 0.200065  | -1.597611 | 1.678149  |
| H | 2.741167  | 3.828724  | 0.761558  |
| H | 0.149308  | 2.854731  | 3.326935  |
| H | -1.081465 | 1.511600  | -2.523966 |
| H | -0.208658 | 2.985885  | -2.123276 |
| H | -2.264307 | 4.145067  | -1.520506 |
| H | -2.346377 | 3.524532  | -3.166330 |
| H | -3.614212 | 2.206988  | -0.703598 |
| H | -4.482971 | 3.244890  | -1.849131 |
| H | -4.028292 | 1.620037  | -3.683772 |
| H | -3.212238 | 0.545117  | -2.512978 |

### Study of first Propagation step of the 7CC ROP reaction

$E_{7CC}$

$G = -2422,114547$  u.a.

|    |           |           |           |
|----|-----------|-----------|-----------|
| C  | -1.239791 | 1.809779  | 4.461926  |
| C  | -0.582401 | 0.746571  | 3.795800  |
| C  | -1.033684 | -0.583553 | 3.943023  |
| C  | -2.148860 | -0.828367 | 4.750640  |
| C  | -2.798342 | 0.203006  | 5.417208  |
| C  | -2.338303 | 1.507346  | 5.272833  |
| N  | 0.526802  | 1.035950  | 2.938243  |
| C  | 1.756834  | 1.098686  | 3.448896  |
| C  | 2.001078  | 0.674334  | 4.881339  |
| C  | -0.349830 | -1.748819 | 3.244945  |
| C  | -1.228075 | -2.297967 | 2.112305  |
| C  | -0.771812 | 3.255127  | 4.342990  |
| C  | 0.012272  | 3.706459  | 5.585851  |
| C  | 2.900561  | 1.493130  | 2.732099  |
| C  | 3.075662  | 1.805440  | 1.372097  |
| C  | 4.453595  | 2.323074  | 1.010912  |
| N  | 2.128057  | 1.704388  | 0.437466  |
| Zn | 0.247079  | 1.267401  | 0.974912  |
| O  | -4.184331 | -4.527623 | -2.065197 |

|   |           |           |           |
|---|-----------|-----------|-----------|
| C | -3.867095 | -3.991629 | -3.097708 |
| O | -3.517559 | -4.693377 | -4.183644 |
| C | -3.156160 | -4.004400 | -5.381285 |
| C | 2.470436  | 1.892448  | -0.941122 |
| C | 2.357011  | 3.164744  | -1.544762 |
| C | 2.694634  | 3.296141  | -2.896626 |
| C | 3.131803  | 2.211549  | -3.643953 |
| C | 3.223407  | 0.960142  | -3.044249 |
| C | 2.891514  | 0.769645  | -1.700077 |
| C | 1.897039  | 4.397541  | -0.780568 |
| C | 3.005814  | 5.458021  | -0.693116 |
| C | 3.004768  | -0.620682 | -1.084378 |
| C | 2.617192  | -1.744460 | -2.054429 |
| O | -1.057090 | 0.448631  | -0.121477 |
| C | -0.659729 | -0.372570 | -1.180590 |
| C | -1.839801 | -0.751289 | -2.079786 |
| C | -2.939767 | -1.511045 | -1.343116 |
| C | -4.158371 | -1.832585 | -2.189030 |
| O | -3.824509 | -2.665462 | -3.321055 |
| O | -1.003166 | 3.113911  | 0.893715  |
| C | -2.152859 | 2.885851  | 0.546493  |
| O | -2.592103 | 3.355648  | -0.620950 |
| C | -3.670545 | 2.690889  | -1.305920 |
| C | -5.018542 | 3.236886  | -0.871486 |
| C | -5.106071 | 3.298200  | 0.657748  |
| C | -4.399536 | 2.136497  | 1.333545  |
| O | -2.959566 | 2.238853  | 1.378217  |
| C | 4.411917  | -0.895041 | -0.528930 |
| C | 0.631840  | 5.006904  | -1.399590 |
| C | 0.050426  | -2.861730 | 4.223525  |
| C | -1.929097 | 4.229452  | 4.086938  |
| H | 1.157186  | 0.894361  | 5.535638  |
| H | 2.152717  | -0.411540 | 4.908122  |
| H | 2.901659  | 1.143815  | 5.282304  |
| H | 3.803517  | 1.562809  | 3.328121  |
| H | 4.709352  | 2.155601  | -0.035499 |
| H | 5.218273  | 1.868096  | 1.644674  |
| H | 4.483964  | 3.403883  | 1.190453  |
| H | -2.842391 | 2.311328  | 5.802993  |
| H | -3.655407 | -0.008561 | 6.051510  |
| H | -2.506832 | -1.848507 | 4.864563  |
| H | 3.555662  | 0.111922  | -3.635422 |
| H | 3.395990  | 2.337030  | -4.690698 |
| H | 2.615757  | 4.272805  | -3.367853 |
| H | 4.468307  | -1.909841 | -0.119116 |
| H | 5.164196  | -0.810515 | -1.321688 |
| H | 4.682276  | -0.200373 | 0.268607  |
| H | 2.536001  | -2.692207 | -1.511819 |
| H | 1.658966  | -1.550542 | -2.543543 |
| H | 3.372619  | -1.888650 | -2.835236 |
| H | 0.625690  | -3.635673 | 3.703744  |
| H | 0.662530  | -2.477864 | 5.046120  |
| H | -0.826173 | -3.349546 | 4.663855  |
| H | -2.173346 | -2.691674 | 2.503622  |
| H | -1.455541 | -1.510636 | 1.387221  |
| H | -0.718861 | -3.117239 | 1.591472  |
| H | 0.329153  | 4.750199  | 5.479409  |
| H | -0.608056 | 3.635552  | 6.486998  |
| H | 0.908733  | 3.103521  | 5.750101  |
| H | -1.536790 | 5.228259  | 3.867175  |
| H | -2.533847 | 3.904715  | 3.238013  |
| H | -2.585106 | 4.324622  | 4.959899  |
| H | 2.678374  | 6.302988  | -0.077134 |
| H | 3.924926  | 5.056409  | -0.256717 |
| H | 3.258584  | 5.851213  | -1.684426 |
| H | 0.295736  | 5.863536  | -0.804887 |
| H | 0.818915  | 5.364657  | -2.418726 |
| H | -0.183326 | 4.281830  | -1.430257 |
| H | 0.100316  | 0.111362  | -1.818669 |
| H | -0.204537 | -1.314866 | -0.816542 |

|   |           |           |           |
|---|-----------|-----------|-----------|
| H | 2.307662  | -0.655450 | -0.238955 |
| H | 0.569603  | -1.365557 | 2.790332  |
| H | 1.645644  | 4.084172  | 0.237104  |
| H | -0.102845 | 3.310299  | 3.479717  |
| H | -3.576360 | 1.616610  | -1.126364 |
| H | -3.477583 | 2.871707  | -2.365253 |
| H | -5.186142 | 4.230463  | -1.299338 |
| H | -5.796519 | 2.578442  | -1.277354 |
| H | -4.676065 | 4.234616  | 1.030313  |
| H | -6.153134 | 3.293459  | 0.979947  |
| H | -4.669127 | 2.076267  | 2.389886  |
| H | -4.651456 | 1.176829  | 0.869060  |
| H | -1.466825 | -1.357680 | -2.915656 |
| H | -2.253345 | 0.166115  | -2.523317 |
| H | -3.268902 | -0.915553 | -0.482312 |
| H | -2.545233 | -2.446639 | -0.928563 |
| H | -4.925113 | -2.344448 | -1.601670 |
| H | -4.582976 | -0.929502 | -2.639447 |
| H | -2.918971 | -4.786966 | -6.102986 |
| H | -3.983664 | -3.394124 | -5.752823 |
| H | -2.282671 | -3.366252 | -5.224098 |

TS(E<sub>7CC</sub>→F<sub>7CC</sub>)

G = -2422,106982 u.a.

|    |           |           |           |
|----|-----------|-----------|-----------|
| C  | -1.683678 | 0.750419  | 4.033313  |
| C  | -0.565908 | 0.083476  | 3.482196  |
| C  | -0.475465 | -1.328445 | 3.525984  |
| C  | -1.525071 | -2.047332 | 4.105254  |
| C  | -2.630146 | -1.403517 | 4.649075  |
| C  | -2.697423 | -0.016340 | 4.616794  |
| N  | 0.458477  | 0.837031  | 2.824435  |
| C  | 1.607000  | 1.090671  | 3.453867  |
| C  | 1.768896  | 0.694456  | 4.904995  |
| C  | 0.711673  | -2.087655 | 2.946940  |
| C  | 0.340350  | -2.768367 | 1.622375  |
| C  | -1.797805 | 2.267615  | 4.042199  |
| C  | -1.573617 | 2.837924  | 5.451435  |
| C  | 2.735832  | 1.673115  | 2.851829  |
| C  | 2.988413  | 2.027545  | 1.512869  |
| C  | 4.394295  | 2.522625  | 1.243023  |
| N  | 2.093415  | 1.968702  | 0.525646  |
| Zn | 0.221375  | 1.436430  | 0.946907  |
| O  | -3.880590 | -4.682548 | 0.207380  |
| C  | -4.307945 | -4.302683 | -0.854604 |
| O  | -4.480643 | -5.139899 | -1.887851 |
| C  | -5.006398 | -4.638934 | -3.116815 |
| C  | 2.456433  | 2.323699  | -0.812514 |
| C  | 2.507012  | 3.678556  | -1.213981 |
| C  | 2.821232  | 3.966806  | -2.546674 |
| C  | 3.080196  | 2.960505  | -3.466736 |
| C  | 3.023303  | 1.631546  | -3.061364 |
| C  | 2.710086  | 1.286424  | -1.744246 |
| C  | 2.232524  | 4.836422  | -0.263825 |
| C  | 3.425424  | 5.801786  | -0.175300 |
| C  | 2.692075  | -0.176830 | -1.322547 |
| C  | 2.246664  | -1.131722 | -2.435483 |
| O  | -1.220902 | 0.788407  | -0.169715 |
| C  | -1.274285 | -0.149661 | -1.206872 |
| C  | -2.662807 | -0.781065 | -1.328927 |
| C  | -3.090403 | -1.512961 | -0.059366 |
| C  | -4.499219 | -2.072262 | -0.102511 |
| O  | -4.670594 | -3.045735 | -1.160321 |
| O  | -1.093362 | 3.086994  | 0.636950  |
| C  | -1.796121 | 2.712840  | -0.318553 |
| O  | -1.388142 | 3.006234  | -1.571802 |
| C  | -2.359009 | 2.917718  | -2.626065 |
| C  | -3.297465 | 4.134871  | -2.636333 |
| C  | -3.523346 | 4.713901  | -1.235605 |
| C  | -3.947441 | 3.684843  | -0.195119 |

|   |           |           |           |
|---|-----------|-----------|-----------|
| O | -3.139732 | 2.489439  | -0.204164 |
| C | 4.058963  | -0.617225 | -0.773699 |
| C | 0.965826  | 5.605014  | -0.666708 |
| C | 1.290802  | -3.113662 | 3.931540  |
| C | -3.138576 | 2.750164  | 3.475902  |
| H | 0.833507  | 0.790706  | 5.459001  |
| H | 2.079927  | -0.353384 | 4.979850  |
| H | 2.537166  | 1.303452  | 5.385784  |
| H | 3.578743  | 1.817408  | 3.518789  |
| H | 4.674400  | 2.429132  | 0.193299  |
| H | 5.114254  | 1.975927  | 1.856584  |
| H | 4.470780  | 3.580716  | 1.515788  |
| H | -3.555958 | 0.486526  | 5.054207  |
| H | -3.432897 | -1.981493 | 5.099013  |
| H | -1.475925 | -3.132621 | 4.129711  |
| H | 3.227832  | 0.847356  | -3.783851 |
| H | 3.326216  | 3.208048  | -4.496006 |
| H | 2.861849  | 5.005278  | -2.865736 |
| H | 4.031996  | -1.670659 | -0.472884 |
| H | 4.835407  | -0.504464 | -1.538971 |
| H | 4.356734  | -0.029515 | 0.098021  |
| H | 2.090315  | -2.134819 | -2.025169 |
| H | 1.312190  | -0.805321 | -2.900818 |
| H | 3.002896  | -1.224494 | -3.223050 |
| H | 2.206692  | -3.554878 | 3.523449  |
| H | 1.533707  | -2.660225 | 4.897903  |
| H | 0.591632  | -3.935257 | 4.120042  |
| H | -0.455969 | -3.507083 | 1.764619  |
| H | -0.014582 | -2.035048 | 0.893172  |
| H | 1.207085  | -3.285990 | 1.195574  |
| H | -1.634601 | 3.932056  | 5.436863  |
| H | -2.331916 | 2.469952  | 6.152147  |
| H | -0.592405 | 2.564232  | 5.850817  |
| H | -3.144376 | 3.844261  | 3.414644  |
| H | -3.304623 | 2.348723  | 2.473644  |
| H | -3.981068 | 2.454978  | 4.111945  |
| H | 3.242762  | 6.563942  | 0.590364  |
| H | 4.358136  | 5.286939  | 0.072824  |
| H | 3.584484  | 6.325491  | -1.124508 |
| H | 0.763879  | 6.406212  | 0.053468  |
| H | 1.083373  | 6.066624  | -1.654121 |
| H | 0.102380  | 4.938762  | -0.696050 |
| H | -0.996871 | 0.318971  | -2.168019 |
| H | -0.537603 | -0.951484 | -1.036091 |
| H | 1.971236  | -0.269943 | -0.500936 |
| H | 1.501018  | -1.362826 | 2.725787  |
| H | 2.056292  | 4.420356  | 0.732727  |
| H | -1.011864 | 2.663077  | 3.392650  |
| H | -2.922174 | 1.988956  | -2.519830 |
| H | -1.766433 | 2.863742  | -3.541683 |
| H | -2.882350 | 4.924252  | -3.272116 |
| H | -4.250271 | 3.833408  | -3.088649 |
| H | -2.602313 | 5.202517  | -0.899849 |
| H | -4.289715 | 5.496913  | -1.272533 |
| H | -3.921931 | 4.124695  | 0.808644  |
| H | -4.960169 | 3.318941  | -0.387820 |
| H | -2.665158 | -1.467319 | -2.186167 |
| H | -3.393788 | 0.008205  | -1.549465 |
| H | -3.034092 | -0.816213 | 0.784223  |
| H | -2.398559 | -2.332366 | 0.165661  |
| H | -4.760435 | -2.547249 | 0.846341  |
| H | -5.231925 | -1.294432 | -0.336990 |
| H | -5.055970 | -5.501673 | -3.782423 |
| H | -6.005863 | -4.217793 | -2.978691 |
| H | -4.352883 | -3.874938 | -3.546426 |

F<sub>7CC</sub>

G = -2422,120939 u.a.

|   |           |           |          |
|---|-----------|-----------|----------|
| C | -0.898349 | -1.779073 | 2.974668 |
|---|-----------|-----------|----------|

|    |           |           |           |
|----|-----------|-----------|-----------|
| C  | -0.734935 | -0.389205 | 3.163195  |
| C  | -1.611268 | 0.340250  | 3.997730  |
| C  | -2.656101 | -0.345178 | 4.625020  |
| C  | -2.832920 | -1.713051 | 4.446609  |
| C  | -1.957176 | -2.417509 | 3.628847  |
| N  | 0.308812  | 0.303759  | 2.461805  |
| C  | 1.502869  | 0.465335  | 3.051606  |
| C  | 1.708917  | -0.108626 | 4.433606  |
| C  | -1.458990 | 1.839343  | 4.215128  |
| C  | -1.434059 | 2.219064  | 5.702286  |
| C  | 0.031831  | -2.595591 | 2.088721  |
| C  | 0.680146  | -3.761496 | 2.850084  |
| C  | 2.597510  | 1.139629  | 2.488932  |
| C  | 2.732361  | 1.782478  | 1.242148  |
| C  | 4.067345  | 2.423512  | 0.946538  |
| N  | 1.760585  | 1.852279  | 0.336051  |
| Zn | -0.008646 | 1.050141  | 0.701288  |
| O  | -2.030277 | -0.600178 | -1.412882 |
| C  | -2.868929 | -1.012658 | -2.486133 |
| C  | -2.535355 | -0.309645 | -3.811498 |
| C  | -2.049264 | 1.126947  | -3.603769 |
| C  | -2.939003 | 1.971193  | -2.698524 |
| O  | -3.331626 | 1.325196  | -1.484444 |
| C  | -2.321493 | 0.657023  | -0.781180 |
| O  | -2.802902 | 0.414195  | 0.519987  |
| C  | -3.851369 | -0.531646 | 0.722322  |
| C  | 1.986635  | 2.500653  | -0.920384 |
| C  | 1.628686  | 3.857024  | -1.077379 |
| C  | 1.801815  | 4.449388  | -2.331972 |
| C  | 2.308359  | 3.729954  | -3.407360 |
| C  | 2.648168  | 2.392552  | -3.239476 |
| C  | 2.497048  | 1.753240  | -2.005430 |
| C  | 1.032104  | 4.672588  | 0.060010  |
| C  | 1.813132  | 5.966028  | 0.328913  |
| C  | 2.845696  | 0.277203  | -1.874873 |
| C  | 4.250161  | -0.047664 | -2.401919 |
| O  | -1.199089 | 1.375796  | -0.678611 |
| C  | 1.790869  | -0.598890 | -2.568677 |
| C  | -0.451407 | 4.972943  | -0.205203 |
| C  | -2.558487 | 2.617706  | 3.477044  |
| C  | -0.692594 | -3.108972 | 0.835297  |
| H  | 1.520487  | -1.186032 | 4.441966  |
| H  | 2.725062  | 0.072893  | 4.785763  |
| H  | 1.006894  | 0.334069  | 5.146509  |
| H  | 4.766206  | 2.282249  | 1.772061  |
| H  | 4.507115  | 2.004393  | 0.036732  |
| H  | 3.947606  | 3.496438  | 0.766441  |
| H  | 3.480898  | 1.171666  | 3.114727  |
| H  | -3.343704 | 0.202782  | 5.263620  |
| H  | -3.649990 | -2.227372 | 4.945344  |
| H  | -2.095817 | -3.487265 | 3.493804  |
| H  | 3.035834  | 1.830631  | -4.085256 |
| H  | 2.434599  | 4.208619  | -4.374782 |
| H  | 1.529248  | 5.492816  | -2.468642 |
| H  | 4.495921  | -1.096605 | -2.203975 |
| H  | 4.324145  | 0.104152  | -3.484151 |
| H  | 5.017483  | 0.573571  | -1.928457 |
| H  | 2.029790  | -1.661198 | -2.442478 |
| H  | 0.788926  | -0.423750 | -2.165826 |
| H  | 1.759748  | -0.389622 | -3.644213 |
| H  | 1.402925  | -4.277780 | 2.208990  |
| H  | 1.207731  | -3.422458 | 3.747402  |
| H  | -0.064502 | -4.500644 | 3.164833  |
| H  | -1.511601 | -3.785243 | 1.106390  |
| H  | -1.112517 | -2.290957 | 0.242943  |
| H  | 0.000937  | -3.669670 | 0.197971  |
| H  | -1.235964 | 3.290396  | 5.815324  |
| H  | -2.392723 | 2.012935  | 6.189937  |
| H  | -0.659715 | 1.673362  | 6.251499  |
| H  | -2.392525 | 3.697237  | 3.566909  |

|   |            |           |           |
|---|------------|-----------|-----------|
| H | -2.589993  | 2.355335  | 2.415843  |
| H | -3.544036  | 2.396834  | 3.901859  |
| H | 1.399332   | 6.485396  | 1.200121  |
| H | 2.871948   | 5.768378  | 0.525552  |
| H | 1.758030   | 6.657005  | -0.519365 |
| H | -0.893044  | 5.512374  | 0.640470  |
| H | -0.569308  | 5.598896  | -1.097343 |
| H | -1.018382  | 4.051003  | -0.364467 |
| H | -3.659380  | -1.427995 | 0.121805  |
| H | -3.755625  | -0.813682 | 1.775327  |
| C | -5.254145  | 0.010301  | 0.457682  |
| H | 2.831231   | 0.024263  | -0.809747 |
| H | 0.837994   | -1.933805 | 1.755667  |
| H | 1.087318   | 4.063818  | 0.968575  |
| H | -0.497925  | 2.140685  | 3.786016  |
| H | -3.920771  | -0.848175 | -2.231540 |
| H | -2.711784  | -2.093014 | -2.573223 |
| H | -1.752526  | -0.863312 | -4.343140 |
| H | -3.426886  | -0.334007 | -4.452270 |
| H | -1.046324  | 1.103725  | -3.170403 |
| H | -1.965301  | 1.638325  | -4.570935 |
| H | -2.430817  | 2.914163  | -2.463686 |
| H | -3.889136  | 2.206534  | -3.191341 |
| C | -5.554967  | 1.287874  | 1.235841  |
| C | -6.954479  | 1.831100  | 1.016571  |
| O | -7.976445  | 0.896907  | 1.436095  |
| C | -8.286537  | 0.927059  | 2.743261  |
| O | -9.229928  | 0.027588  | 3.055848  |
| O | -7.806234  | 1.660596  | 3.571562  |
| C | -9.779624  | -0.799677 | 2.029918  |
| H | -10.522936 | -1.422448 | 2.529246  |
| H | -10.258619 | -0.200564 | 1.250997  |
| H | -9.011762  | -1.430583 | 1.574144  |
| H | -5.386521  | 0.198521  | -0.613202 |
| H | -5.966196  | -0.777533 | 0.737636  |
| H | -5.401794  | 1.133311  | 2.310146  |
| H | -4.846624  | 2.063321  | 0.924134  |
| H | -7.101372  | 2.767371  | 1.560874  |
| H | -7.158912  | 1.989389  | -0.046168 |

### TS(F<sub>7CC</sub>→G<sub>7CC</sub>)

G = -2422,111727 u.a.

|    |           |           |           |
|----|-----------|-----------|-----------|
| C  | -1.145108 | -1.625032 | 2.839314  |
| C  | -0.879527 | -0.251800 | 3.042471  |
| C  | -1.676297 | 0.515974  | 3.922960  |
| C  | -2.746264 | -0.111779 | 4.567883  |
| C  | -3.025146 | -1.459426 | 4.371875  |
| C  | -2.221818 | -2.205634 | 3.517482  |
| N  | 0.182213  | 0.373043  | 2.309295  |
| C  | 1.374728  | 0.524418  | 2.879785  |
| C  | 1.602592  | 0.018390  | 4.286574  |
| C  | -1.413080 | 1.990858  | 4.198523  |
| C  | -1.243634 | 2.272341  | 5.699880  |
| C  | -0.283050 | -2.495366 | 1.935839  |
| C  | 0.462316  | -3.575959 | 2.733999  |
| C  | 2.478513  | 1.159921  | 2.274792  |
| C  | 2.624587  | 1.722719  | 0.999224  |
| C  | 3.978832  | 2.317388  | 0.685545  |
| N  | 1.672532  | 1.751133  | 0.058876  |
| Zn | -0.144556 | 1.061875  | 0.462159  |
| O  | -1.464414 | 0.056203  | -0.678044 |
| C  | -1.639829 | -0.441869 | -1.981180 |
| C  | -1.267932 | 0.521636  | -3.119701 |
| C  | -1.559616 | 1.992814  | -2.819190 |
| C  | -2.958545 | 2.324824  | -2.324164 |
| O  | -3.435898 | 1.517233  | -1.235612 |
| C  | -2.650564 | 1.383789  | -0.142802 |
| O  | -3.301073 | 0.768523  | 0.864149  |
| C  | -4.257344 | -0.263083 | 0.582018  |

|   |           |           |           |
|---|-----------|-----------|-----------|
| C | 1.974067  | 2.270957  | -1.239891 |
| C | 1.641182  | 3.608577  | -1.558685 |
| C | 1.826320  | 4.045590  | -2.874761 |
| C | 2.336750  | 3.202569  | -3.854085 |
| C | 2.708340  | 1.906079  | -3.515151 |
| C | 2.553003  | 1.420238  | -2.213421 |
| C | 1.143338  | 4.597701  | -0.511991 |
| C | 2.133758  | 5.760575  | -0.337732 |
| C | 3.043326  | 0.015567  | -1.878576 |
| C | 4.501680  | -0.198873 | -2.312486 |
| O | -1.798097 | 2.262286  | 0.204646  |
| C | 2.148864  | -1.076504 | -2.478979 |
| C | -0.258416 | 5.137617  | -0.826884 |
| C | -2.515671 | 2.886080  | 3.614326  |
| C | -1.103019 | -3.127105 | 0.803513  |
| H | 1.117021  | -0.945690 | 4.450892  |
| H | 2.669202  | -0.076589 | 4.497367  |
| H | 1.175613  | 0.716444  | 5.014192  |
| H | 4.606708  | 2.352717  | 1.576926  |
| H | 4.497300  | 1.727542  | -0.076565 |
| H | 3.880057  | 3.328933  | 0.283386  |
| H | 3.362623  | 1.216637  | 2.898332  |
| H | -3.372813 | 0.467594  | 5.241032  |
| H | -3.858927 | -1.926186 | 4.889525  |
| H | -2.428912 | -3.263708 | 3.376581  |
| H | 3.137967  | 1.258674  | -4.275390 |
| H | 2.464889  | 3.559786  | -4.872375 |
| H | 1.568317  | 5.069783  | -3.132448 |
| H | 4.866906  | -1.165179 | -1.948127 |
| H | 4.603971  | -0.202535 | -3.403085 |
| H | 5.164159  | 0.581527  | -1.924647 |
| H | 2.541205  | -2.070508 | -2.236398 |
| H | 1.131104  | -1.012985 | -2.086806 |
| H | 2.098943  | -0.994267 | -3.570737 |
| H | 1.109945  | -4.162518 | 2.072662  |
| H | 1.089170  | -3.142442 | 3.519410  |
| H | -0.236648 | -4.270029 | 3.214144  |
| H | -1.865496 | -3.811537 | 1.192581  |
| H | -1.600242 | -2.351630 | 0.216248  |
| H | -0.452676 | -3.705791 | 0.137307  |
| H | -0.943269 | 3.313831  | 5.858856  |
| H | -2.180837 | 2.117128  | 6.245610  |
| H | -0.488073 | 1.627794  | 6.160624  |
| H | -2.295409 | 3.940376  | 3.819353  |
| H | -2.598708 | 2.753426  | 2.533783  |
| H | -3.485887 | 2.655747  | 4.069741  |
| H | 1.808744  | 6.418379  | 0.475733  |
| H | 3.143919  | 5.410352  | -0.103144 |
| H | 2.200054  | 6.367867  | -1.247333 |
| H | -0.557135 | 5.872322  | -0.070783 |
| H | -0.285288 | 5.638189  | -1.801663 |
| H | -0.998876 | 4.334640  | -0.819553 |
| H | -4.049163 | -0.707368 | -0.393160 |
| H | -4.084719 | -1.020448 | 1.352318  |
| C | -5.683430 | 0.262941  | 0.648681  |
| H | 3.002255  | -0.100964 | -0.791333 |
| H | 0.469577  | -1.847979 | 1.474954  |
| H | 1.082174  | 4.066188  | 0.442926  |
| H | -0.476959 | 2.263432  | 3.700880  |
| H | -2.699174 | -0.714612 | -2.094460 |
| H | -1.070378 | -1.376641 | -2.091202 |
| H | -0.198916 | 0.446784  | -3.346806 |
| H | -1.801315 | 0.195497  | -4.023531 |
| H | -0.834486 | 2.356822  | -2.089934 |
| H | -1.392969 | 2.588122  | -3.725753 |
| H | -3.005160 | 3.377695  | -2.022743 |
| H | -3.705685 | 2.157273  | -3.106059 |
| C | -6.038991 | 0.852474  | 2.012750  |
| C | -7.459032 | 1.380390  | 2.105352  |
| O | -8.441249 | 0.344244  | 1.880788  |

|   |            |           |           |
|---|------------|-----------|-----------|
| C | -8.762147  | -0.390686 | 2.961053  |
| O | -9.670729  | -1.332270 | 2.674919  |
| O | -8.315271  | -0.250144 | 4.072217  |
| C | -10.183950 | -1.435107 | 1.346121  |
| H | -10.903394 | -2.254164 | 1.377956  |
| H | -10.684082 | -0.511967 | 1.041636  |
| H | -9.390203  | -1.665274 | 0.630417  |
| H | -5.822446  | 1.014057  | -0.137963 |
| H | -6.358615  | -0.570498 | 0.415758  |
| H | -5.886074  | 0.110432  | 2.804818  |
| H | -5.360301  | 1.683832  | 2.235591  |
| H | -7.646035  | 1.825950  | 3.085530  |
| H | -7.664219  | 2.116966  | 1.323110  |

### G<sub>7CC</sub>

G = -2422,121298 u.a.

|    |           |           |           |
|----|-----------|-----------|-----------|
| C  | -1.142223 | -1.648524 | 2.785514  |
| C  | -0.848662 | -0.282040 | 3.001382  |
| C  | -1.626701 | 0.489878  | 3.897453  |
| C  | -2.712609 | -0.122230 | 4.531202  |
| C  | -3.023915 | -1.459423 | 4.315001  |
| C  | -2.233434 | -2.212460 | 3.454587  |
| N  | 0.219459  | 0.328964  | 2.266459  |
| C  | 1.392710  | 0.537044  | 2.856981  |
| C  | 1.624480  | 0.063356  | 4.275145  |
| C  | -1.327237 | 1.950191  | 4.215416  |
| C  | -1.147974 | 2.177547  | 5.725568  |
| C  | -0.279503 | -2.537756 | 1.901335  |
| C  | 0.498734  | -3.562303 | 2.742101  |
| C  | 2.484025  | 1.203827  | 2.261795  |
| C  | 2.624826  | 1.770635  | 0.988654  |
| C  | 3.951271  | 2.434251  | 0.696649  |
| N  | 1.690468  | 1.746865  | 0.030101  |
| Zn | -0.033919 | 0.811701  | 0.334151  |
| O  | -1.174301 | -0.251731 | -0.696326 |
| C  | -1.489889 | -0.547510 | -2.016126 |
| C  | -1.192225 | 0.527245  | -3.074307 |
| C  | -1.541030 | 1.962480  | -2.684398 |
| C  | -2.969063 | 2.260177  | -2.262084 |
| O  | -3.475000 | 1.485538  | -1.147739 |
| C  | -2.850275 | 1.572650  | 0.019949  |
| O  | -3.405464 | 0.847113  | 0.975480  |
| C  | -4.366066 | -0.185735 | 0.667816  |
| C  | 1.993052  | 2.270328  | -1.267157 |
| C  | 1.651555  | 3.603555  | -1.594555 |
| C  | 1.832621  | 4.032303  | -2.914116 |
| C  | 2.349259  | 3.186346  | -3.887688 |
| C  | 2.734537  | 1.896413  | -3.538977 |
| C  | 2.583085  | 1.419114  | -2.233763 |
| C  | 1.149765  | 4.598450  | -0.554669 |
| C  | 2.124111  | 5.778658  | -0.405180 |
| C  | 3.093152  | 0.025379  | -1.883174 |
| C  | 4.554253  | -0.170721 | -2.316107 |
| O  | -1.903528 | 2.313861  | 0.272851  |
| C  | 2.211630  | -1.087889 | -2.464554 |
| C  | -0.259708 | 5.122784  | -0.862407 |
| C  | -2.408380 | 2.894898  | 3.671511  |
| C  | -1.095294 | -3.234481 | 0.805909  |
| H  | 1.058263  | -0.842425 | 4.498634  |
| H  | 2.686580  | -0.125568 | 4.444701  |
| H  | 1.306358  | 0.830063  | 4.989198  |
| H  | 4.603915  | 2.409054  | 1.570324  |
| H  | 4.463157  | 1.940357  | -0.134545 |
| H  | 3.806807  | 3.476236  | 0.398553  |
| H  | 3.355457  | 1.296656  | 2.899086  |
| H  | -3.324004 | 0.461388  | 5.214723  |
| H  | -3.868232 | -1.914607 | 4.826134  |
| H  | -2.459334 | -3.265214 | 3.304676  |
| H  | 3.171452  | 1.247689  | -4.293858 |

|   |            |           |           |
|---|------------|-----------|-----------|
| H | 2.473308   | 3.537146  | -4.908757 |
| H | 1.566907   | 5.052659  | -3.179506 |
| H | 4.932821   | -1.128736 | -1.943589 |
| H | 4.657186   | -0.182244 | -3.406635 |
| H | 5.205028   | 0.622053  | -1.933130 |
| H | 2.629192   | -2.071456 | -2.220965 |
| H | 1.198323   | -1.044146 | -2.058176 |
| H | 2.147478   | -1.013906 | -3.556301 |
| H | 1.153030   | -4.165229 | 2.102414  |
| H | 1.122874   | -3.078103 | 3.499889  |
| H | -0.181374  | -4.247089 | 3.261429  |
| H | -1.849635  | -3.909087 | 1.226790  |
| H | -1.587776  | -2.487547 | 0.179402  |
| H | -0.436550  | -3.837456 | 0.170460  |
| H | -0.805821  | 3.200438  | 5.917840  |
| H | -2.092379  | 2.044203  | 6.264699  |
| H | -0.422353  | 1.487291  | 6.166955  |
| H | -2.169110  | 3.932704  | 3.931732  |
| H | -2.482699  | 2.820493  | 2.585625  |
| H | -3.387019  | 2.661325  | 4.106482  |
| H | 1.806160   | 6.433697  | 0.413341  |
| H | 3.146018   | 5.448526  | -0.194228 |
| H | 2.159122   | 6.384131  | -1.317806 |
| H | -0.554362  | 5.869699  | -0.116641 |
| H | -0.301221  | 5.604528  | -1.846119 |
| H | -0.996453  | 4.317619  | -0.832323 |
| H | -4.118510  | -0.626478 | -0.298884 |
| H | -4.197741  | -0.929249 | 1.450314  |
| C | -5.792352  | 0.336879  | 0.701258  |
| H | 3.058616   | -0.075595 | -0.793971 |
| H | 0.452822   | -1.896712 | 1.401179  |
| H | 1.101822   | 4.076317  | 0.406240  |
| H | -0.388351  | 2.218373  | 3.721454  |
| H | -2.571799  | -0.769977 | -2.070610 |
| H | -0.987034  | -1.474863 | -2.350313 |
| H | -0.123477  | 0.522509  | -3.318652 |
| H | -1.720658  | 0.241359  | -3.995828 |
| H | -0.863781  | 2.301074  | -1.899840 |
| H | -1.343290  | 2.620457  | -3.540908 |
| H | -3.070894  | 3.319784  | -2.003644 |
| H | -3.679175  | 2.026072  | -3.059939 |
| C | -6.191134  | 0.920587  | 2.056322  |
| C | -7.622798  | 1.423883  | 2.109706  |
| O | -8.578218  | 0.371396  | 1.856250  |
| C | -8.913536  | -0.371863 | 2.928328  |
| O | -9.800495  | -1.325326 | 2.619974  |
| O | -8.492276  | -0.225756 | 4.048528  |
| C | -10.285144 | -1.432740 | 1.280443  |
| H | -10.994794 | -2.260583 | 1.296968  |
| H | -10.790190 | -0.515388 | 0.966978  |
| H | -9.473984  | -1.652827 | 0.581324  |
| H | -5.922731  | 1.084363  | -0.090939 |
| H | -6.453416  | -0.502042 | 0.449855  |
| H | -6.048803  | 0.179297  | 2.850817  |
| H | -5.534006  | 1.763219  | 2.302053  |
| H | -7.842908  | 1.864115  | 3.085331  |
| H | -7.818815  | 2.159100  | 1.323758  |

### TS(G<sub>7CC</sub>→H<sub>7CC</sub>)

G = -2422,118503 u.a.

|    |           |          |           |
|----|-----------|----------|-----------|
| C  | 2.519505  | 1.378344 | -2.238568 |
| C  | 1.976521  | 2.238496 | -1.252456 |
| C  | 1.666690  | 3.583563 | -1.562696 |
| C  | 1.828222  | 4.015488 | -2.883843 |
| C  | 2.299850  | 3.163337 | -3.874651 |
| C  | 2.657299  | 1.861193 | -3.543301 |
| N  | 1.688924  | 1.713100 | 0.048696  |
| Zn | -0.034815 | 0.808740 | 0.381629  |
| O  | -2.080842 | 2.532128 | 0.366063  |

|   |            |           |           |
|---|------------|-----------|-----------|
| C | -2.993296  | 1.757795  | 0.118200  |
| O | -3.545397  | 1.031739  | 1.081047  |
| C | -4.455645  | -0.043377 | 0.774070  |
| C | -5.901508  | 0.424181  | 0.747763  |
| C | -6.363995  | 1.031816  | 2.071614  |
| C | -7.807335  | 1.503067  | 2.059768  |
| O | -8.729051  | 0.423844  | 1.792815  |
| C | -9.093659  | -0.301447 | 2.867193  |
| O | -8.724101  | -0.120574 | 4.000541  |
| C | 1.224546   | 4.589428  | -0.506027 |
| C | -0.176109  | 5.160106  | -0.769202 |
| C | 2.998910   | -0.032207 | -1.913618 |
| C | 2.116764   | -1.114676 | -2.549586 |
| C | 2.636211   | 1.722245  | 0.997069  |
| C | 3.967547   | 2.368765  | 0.691702  |
| C | 2.497502   | 1.166781  | 2.273866  |
| C | 1.396382   | 0.534782  | 2.890342  |
| C | 1.649596   | 0.069247  | 4.308056  |
| N | 0.213476   | 0.348059  | 2.314265  |
| C | -0.865879  | -0.239687 | 3.052654  |
| C | -1.187010  | -1.599154 | 2.834900  |
| C | -2.284786  | -2.143032 | 3.509193  |
| C | -3.054113  | -1.375957 | 4.376578  |
| C | -2.716623  | -0.045170 | 4.592182  |
| C | -1.624523  | 0.547876  | 3.950798  |
| C | -0.344050  | -2.501824 | 1.945784  |
| C | -1.176580  | -3.189761 | 0.857390  |
| C | -1.290291  | 1.999606  | 4.271257  |
| C | -2.393373  | 2.964859  | 3.814917  |
| C | -1.009258  | 2.193443  | 5.770445  |
| C | 0.427848   | -3.532779 | 2.784416  |
| O | -1.324815  | -0.106907 | -0.581553 |
| C | -1.616045  | -0.422412 | -1.905043 |
| C | -1.303132  | 0.645539  | -2.964117 |
| C | -1.651068  | 2.082052  | -2.578015 |
| C | -3.084389  | 2.384395  | -2.175305 |
| O | -3.596598  | 1.618096  | -1.061827 |
| C | 2.239362   | 5.738784  | -0.384607 |
| C | 4.466354   | -0.237691 | -2.321299 |
| O | -9.946514  | -1.281376 | 2.544703  |
| C | -10.369324 | -1.431152 | 1.188466  |
| H | 0.894465   | -0.636087 | 4.654871  |
| H | 2.635814   | -0.398288 | 4.373576  |
| H | 1.652006   | 0.926585  | 4.989376  |
| H | 4.674081   | 2.216585  | 1.508718  |
| H | 4.402315   | 1.970777  | -0.228755 |
| H | 3.844083   | 3.445217  | 0.539474  |
| H | 3.377837   | 1.242479  | 2.901968  |
| H | -3.311471  | 0.549225  | 5.281055  |
| H | -3.903235  | -1.815937 | 4.892990  |
| H | -2.532761  | -3.190615 | 3.358439  |
| H | 3.060337   | 1.206031  | -4.311538 |
| H | 2.410451   | 3.518283  | -4.895801 |
| H | 1.584295   | 5.044455  | -3.136329 |
| H | 4.821347   | -1.215492 | -1.977958 |
| H | 4.591765   | -0.207867 | -3.409100 |
| H | 5.121378   | 0.528117  | -1.893980 |
| H | 2.508407   | -2.111646 | -2.318233 |
| H | 1.090866   | -1.063298 | -2.177080 |
| H | 2.086965   | -1.013198 | -3.640417 |
| H | 1.069934   | -4.146836 | 2.142913  |
| H | 1.062064   | -3.051528 | 3.535648  |
| H | -0.257352  | -4.206209 | 3.311755  |
| H | -1.930707  | -3.860203 | 1.284866  |
| H | -1.675439  | -2.439916 | 0.239243  |
| H | -0.529689  | -3.795980 | 0.212891  |
| H | -0.661892  | 3.214526  | 5.963592  |
| H | -1.914536  | 2.038558  | 6.367805  |
| H | -0.250005  | 1.499199  | 6.142639  |
| H | -2.118257  | 3.995808  | 4.066533  |

|   |            |           |           |
|---|------------|-----------|-----------|
| H | -2.546242  | 2.902743  | 2.736471  |
| H | -3.342898  | 2.745092  | 4.316513  |
| H | 1.974643   | 6.392701  | 0.453410  |
| H | 3.259352   | 5.376794  | -0.222285 |
| H | 2.253443   | 6.354302  | -1.291022 |
| H | -0.418209  | 5.919952  | -0.017624 |
| H | -0.232049  | 5.640340  | -1.752966 |
| H | -0.942482  | 4.384797  | -0.710539 |
| H | -4.161103  | -0.502092 | -0.170766 |
| H | -4.285849  | -0.759882 | 1.581416  |
| H | 2.939144   | -0.162151 | -0.828617 |
| H | 0.394640   | -1.872289 | 1.439821  |
| H | 1.189965   | 4.066748  | 0.455226  |
| H | -0.382341  | 2.266514  | 3.721833  |
| H | -2.696389  | -0.643717 | -1.967923 |
| H | -1.109126  | -1.354078 | -2.219047 |
| H | -0.231681  | 0.635097  | -3.197285 |
| H | -1.822769  | 0.359307  | -3.890411 |
| H | -0.987198  | 2.412903  | -1.778635 |
| H | -1.433569  | 2.740028  | -3.429602 |
| H | -3.185298  | 3.446692  | -1.927258 |
| H | -3.784911  | 2.145526  | -2.980549 |
| H | -11.060130 | -2.274959 | 1.194104  |
| H | -10.880746 | -0.533488 | 0.831304  |
| H | -9.523441  | -1.647834 | 0.530693  |
| H | -6.033008  | 1.143656  | -0.069660 |
| H | -6.523630  | -0.445461 | 0.501250  |
| H | -6.235234  | 0.314160  | 2.889937  |
| H | -5.735696  | 1.895931  | 2.318732  |
| H | -8.075140  | 1.958464  | 3.016328  |
| H | -7.988836  | 2.216785  | 1.250862  |

### H<sub>7CC</sub>

G = -2422,139796 u.a.

|    |            |           |           |
|----|------------|-----------|-----------|
| C  | -1.181262  | 3.607887  | 3.186239  |
| C  | -1.270883  | 2.320060  | 2.614383  |
| C  | -2.518887  | 1.675514  | 2.466540  |
| C  | -3.665573  | 2.335633  | 2.916936  |
| C  | -3.591944  | 3.598110  | 3.493714  |
| C  | -2.358214  | 4.225258  | 3.620053  |
| N  | -0.088589  | 1.688625  | 2.106291  |
| C  | 0.633906   | 0.881966  | 2.886622  |
| C  | 0.189731   | 0.655724  | 4.312137  |
| C  | -2.643640  | 0.320831  | 1.785437  |
| C  | -3.504604  | -0.672832 | 2.575578  |
| C  | 0.143555   | 4.348594  | 3.290151  |
| C  | 0.396894   | 4.925523  | 4.688954  |
| C  | 1.801946   | 0.214118  | 2.471700  |
| C  | 2.451864   | 0.210118  | 1.224774  |
| C  | 3.710841   | -0.616205 | 1.113917  |
| N  | 2.029476   | 0.886679  | 0.152977  |
| Zn | 0.444133   | 2.025145  | 0.256518  |
| O  | -0.351881  | 3.202715  | -0.884869 |
| C  | -0.187951  | 3.188953  | -2.279501 |
| C  | -0.377469  | 4.591450  | -2.862554 |
| C  | -1.674252  | 5.288724  | -2.441602 |
| C  | -2.922275  | 4.510110  | -2.819730 |
| O  | -4.114267  | 5.241864  | -2.453668 |
| C  | -4.586434  | 6.091479  | -3.381724 |
| O  | -5.642779  | 6.792668  | -2.942710 |
| C  | -6.134571  | 6.621687  | -1.601105 |
| C  | -7.090549  | 5.445267  | -1.481977 |
| C  | -8.315314  | 5.566180  | -2.388479 |
| C  | -9.261901  | 4.382519  | -2.297548 |
| O  | -9.776978  | 4.199650  | -0.960519 |
| C  | -10.852981 | 4.947659  | -0.650400 |
| O  | -11.275689 | 4.723610  | 0.600161  |
| C  | -10.602656 | 3.758732  | 1.409861  |
| C  | 2.753254   | 0.826167  | -1.082300 |

|   |            |           |           |
|---|------------|-----------|-----------|
| C | 2.424302   | -0.162329 | -2.036723 |
| C | 3.079225   | -0.137744 | -3.271774 |
| C | 4.033936   | 0.828918  | -3.564526 |
| C | 4.351457   | 1.791301  | -2.613315 |
| C | 3.727335   | 1.810930  | -1.362443 |
| C | 1.363057   | -1.219562 | -1.769431 |
| C | 1.874970   | -2.644114 | -2.023864 |
| C | 4.082628   | 2.898820  | -0.359388 |
| C | 5.595754   | 3.025397  | -0.137636 |
| O | -4.149040  | 6.237928  | -4.496269 |
| O | -11.402638 | 5.732766  | -1.381623 |
| C | 3.478127   | 4.248200  | -0.777935 |
| C | 0.095826   | -0.946421 | -2.593763 |
| C | -3.179505  | 0.490412  | 0.354611  |
| C | 0.228594   | 5.447854  | 2.218958  |
| H | -0.813835  | 0.219705  | 4.339799  |
| H | 0.875174   | -0.009319 | 4.839066  |
| H | 0.130686   | 1.603936  | 4.855228  |
| H | 3.944399   | -1.108716 | 2.058663  |
| H | 3.610131   | -1.379212 | 0.336056  |
| H | 4.559947   | 0.011404  | 0.825462  |
| H | 2.274004   | -0.393813 | 3.233819  |
| H | -2.306466  | 5.217732  | 4.059681  |
| H | -4.494765  | 4.094816  | 3.838784  |
| H | -4.633576  | 1.853672  | 2.808694  |
| H | 2.831892   | -0.887071 | -4.019264 |
| H | 4.528824   | 0.832675  | -4.531807 |
| H | 5.097497   | 2.546289  | -2.846706 |
| H | 1.114742   | -3.378036 | -1.735398 |
| H | 2.103267   | -2.810591 | -3.082096 |
| H | 2.784127   | -2.858118 | -1.452822 |
| H | -0.680909  | -1.685198 | -2.367130 |
| H | -0.309619  | 0.048840  | -2.387328 |
| H | 0.306406   | -0.999671 | -3.667692 |
| H | -3.489708  | -1.655216 | 2.091421  |
| H | -3.142676  | -0.796529 | 3.601398  |
| H | -4.551241  | -0.354695 | 2.629745  |
| H | -4.195341  | 0.901350  | 0.367019  |
| H | -2.555423  | 1.176839  | -0.226840 |
| H | -3.212539  | -0.473481 | -0.165691 |
| H | 1.395364   | 5.373100  | 4.738136  |
| H | -0.322789  | 5.710852  | 4.943727  |
| H | 0.334254   | 4.154565  | 5.463971  |
| H | 1.203156   | 5.947861  | 2.255337  |
| H | 0.086146   | 5.041098  | 1.212697  |
| H | -0.543704  | 6.208380  | 2.381012  |
| H | 5.801951   | 3.748567  | 0.658651  |
| H | 6.044981   | 2.069155  | 0.149529  |
| H | 6.112148   | 3.377360  | -1.037094 |
| H | 3.715033   | 5.023009  | -0.040233 |
| H | 3.878050   | 4.572764  | -1.745179 |
| H | 2.388816   | 4.190167  | -0.870322 |
| H | -5.295219  | 6.515427  | -0.909930 |
| H | -6.650972  | 7.562940  | -1.389274 |
| H | 1.087197   | -1.153507 | -0.712068 |
| H | -1.638375  | -0.106664 | 1.711897  |
| H | 3.635182   | 2.622992  | 0.601126  |
| H | 0.942414   | 3.627852  | 3.086458  |
| H | -0.919394  | 2.504496  | -2.748871 |
| H | 0.805787   | 2.824338  | -2.589545 |
| H | 0.464841   | 5.220323  | -2.549168 |
| H | -0.326266  | 4.521401  | -3.958448 |
| H | -1.667573  | 5.437577  | -1.357439 |
| H | -1.723526  | 6.274305  | -2.918595 |
| H | -2.992721  | 3.577291  | -2.257206 |
| H | -2.959057  | 4.303272  | -3.893033 |
| H | -11.141954 | 3.752010  | 2.357742  |
| H | -10.637442 | 2.765619  | 0.954384  |
| H | -9.559520  | 4.039755  | 1.577925  |
| H | -6.542377  | 4.520528  | -1.698945 |

|   |            |          |           |
|---|------------|----------|-----------|
| H | -7.407351  | 5.380596 | -0.433539 |
| H | -8.876085  | 6.480198 | -2.160207 |
| H | -7.993152  | 5.653522 | -3.433061 |
| H | -10.106061 | 4.507164 | -2.980124 |
| H | -8.748360  | 3.442195 | -2.517550 |

### 3.2.2 Ring-opening polymerization of TMC

#### Study of the TMC ROP Initiation

$A_{TMC}$

$G = -1962,087971$  u.a.

|    |           |           |           |
|----|-----------|-----------|-----------|
| C  | -1.695989 | 0.317981  | 3.556844  |
| C  | 0.187035  | -1.158504 | 2.759062  |
| C  | -1.140288 | -1.113067 | 3.531190  |
| C  | -4.142078 | -2.671785 | 4.561909  |
| C  | -0.997145 | -1.709256 | 4.927145  |
| C  | -0.380710 | -0.958877 | 5.932331  |
| C  | -0.222258 | -1.462253 | 7.218935  |
| C  | -0.683150 | -2.738105 | 7.516785  |
| C  | -1.293809 | -3.538270 | 6.545351  |
| C  | -1.448929 | -3.015144 | 5.241860  |
| N  | -2.001816 | -3.833494 | 4.207484  |
| C  | -3.255150 | -3.630611 | 3.797669  |
| C  | -3.823848 | -4.209369 | 2.650377  |
| C  | -3.253059 | -5.038243 | 1.664360  |
| C  | 0.991827  | -4.198658 | -0.250277 |
| C  | -0.501570 | -4.467627 | -0.491238 |
| H  | 1.609096  | -4.736010 | -0.980567 |
| H  | -5.151884 | -5.130037 | 0.637624  |
| C  | -4.086815 | -5.221263 | 0.413786  |
| C  | -0.951161 | -3.896190 | -1.843908 |
| C  | -0.824379 | -5.949262 | -0.362679 |
| C  | -1.585635 | -6.466194 | 0.709097  |
| C  | -1.857707 | -7.853529 | 0.802372  |
| C  | -1.380545 | -8.691865 | -0.209496 |
| C  | -0.632098 | -8.195956 | -1.271597 |
| C  | -0.352703 | -6.836757 | -1.336173 |
| H  | -4.636644 | -7.735426 | 1.331832  |
| H  | -4.668361 | -9.108014 | 2.441431  |
| C  | -4.129417 | -8.666159 | 1.595640  |
| C  | -2.652830 | -8.443158 | 1.961254  |
| C  | -2.056590 | -9.756714 | 2.484761  |
| N  | -2.044364 | -5.592350 | 1.745970  |
| Zn | -0.812061 | -5.087556 | 3.229136  |
| O  | 1.062887  | -4.974283 | 3.092018  |
| C  | 1.832176  | -4.310098 | 4.054841  |
| C  | -1.799641 | -4.922316 | 6.925252  |
| C  | -3.043002 | -4.831829 | 7.824018  |
| H  | 0.165634  | -5.873657 | 6.962684  |
| H  | -3.412362 | -5.833801 | 8.069806  |
| H  | -2.813090 | -4.319577 | 8.765378  |
| H  | -3.858098 | -4.285356 | 7.339796  |
| H  | 1.894835  | -4.860412 | 5.011057  |
| H  | -1.101523 | -6.784572 | 7.788334  |
| H  | -2.089863 | -5.432087 | 6.002079  |
| H  | 1.467878  | -3.301259 | 4.301852  |
| H  | 2.867701  | -4.183941 | 3.690684  |
| O  | -0.520200 | -7.012573 | 4.395770  |
| C  | 0.570912  | -7.457124 | 4.068947  |
| O  | 1.526543  | -7.618353 | 4.982838  |
| O  | 0.789373  | -7.889124 | 2.834005  |
| C  | 2.105208  | -7.895380 | 2.232285  |
| H  | 2.195257  | -8.880157 | 1.765543  |
| H  | 2.083418  | -7.124910 | 1.460211  |
| C  | 2.747391  | -8.258269 | 4.568881  |
| H  | 3.449856  | -8.081891 | 5.384513  |
| H  | 2.569022  | -9.337621 | 4.482534  |

|   |           |            |           |
|---|-----------|------------|-----------|
| H | -0.406700 | -5.355720  | 8.560925  |
| H | -0.566908 | -3.125791  | 8.525648  |
| H | 0.255725  | -0.859294  | 7.986500  |
| H | -0.018330 | 0.039944   | 5.703606  |
| H | -0.980454 | 1.026676   | 3.987650  |
| H | -2.619824 | 0.387052   | 4.140451  |
| H | -1.911650 | 0.657433   | 2.537930  |
| H | 0.066206  | -0.713919  | 1.764325  |
| H | 0.966170  | -0.595350  | 3.285467  |
| H | 0.540197  | -2.185354  | 2.629735  |
| H | -1.852786 | -1.727922  | 2.973371  |
| H | -3.932933 | -1.636848  | 4.270196  |
| H | -3.971495 | -2.738927  | 5.638390  |
| H | -5.194746 | -2.871718  | 4.352372  |
| H | -4.845538 | -3.907064  | 2.449772  |
| H | 1.285748  | -4.503455  | 0.759927  |
| H | 1.208549  | -3.129455  | -0.359024 |
| H | -1.058223 | -3.938208  | 0.288884  |
| H | -0.800378 | -2.811346  | -1.867578 |
| H | -2.009935 | -4.096408  | -2.037713 |
| H | -0.377674 | -4.322491  | -2.674469 |
| H | -3.831395 | -4.429902  | -0.301244 |
| H | -3.902100 | -6.174208  | -0.082608 |
| H | 0.235268  | -6.450321  | -2.165093 |
| H | -0.268635 | -8.867425  | -2.045349 |
| H | -1.592795 | -9.756415  | -0.159939 |
| H | -2.612196 | -7.717769  | 2.779201  |
| H | -0.988759 | -9.656338  | 2.690188  |
| H | -2.560069 | -10.047963 | 3.412782  |
| H | -2.191846 | -10.580476 | 1.774204  |
| H | -4.221844 | -9.351718  | 0.744980  |
| C | 3.196871  | -7.651545  | 3.257455  |
| H | 3.353764  | -6.579430  | 3.397887  |
| H | 4.137661  | -8.099822  | 2.922626  |
| C | -0.717689 | -5.776721  | 7.597861  |

TS(A<sub>TMC</sub>→B<sub>TMC</sub>)

G = -1962,076651 u.a.

|   |           |           |           |
|---|-----------|-----------|-----------|
| C | -1.651974 | 0.287959  | 3.737374  |
| C | 0.356819  | -0.972505 | 2.899948  |
| C | -0.997731 | -1.097041 | 3.612908  |
| C | -4.069246 | -2.528340 | 4.499664  |
| C | -0.867035 | -1.787193 | 4.966037  |
| C | -0.196236 | -1.121308 | 5.996912  |
| C | -0.053966 | -1.690498 | 7.256442  |
| C | -0.591926 | -2.947593 | 7.502933  |
| C | -1.261338 | -3.664683 | 6.506554  |
| C | -1.393123 | -3.077014 | 5.225809  |
| N | -1.997729 | -3.827009 | 4.167762  |
| C | -3.234920 | -3.547988 | 3.754765  |
| C | -3.849486 | -4.112175 | 2.620943  |
| C | -3.349170 | -5.000136 | 1.650414  |
| C | 0.925856  | -4.315754 | -0.209550 |
| C | -0.572268 | -4.518101 | -0.481915 |
| H | 1.534154  | -4.834810 | -0.959668 |
| H | -5.205327 | -4.765997 | 0.569711  |
| C | -4.232038 | -5.243455 | 0.447911  |
| C | -0.970309 | -3.902125 | -1.830628 |
| C | -0.951371 | -5.988630 | -0.383587 |
| C | -1.744254 | -6.491178 | 0.673447  |
| C | -2.069553 | -7.866344 | 0.739980  |
| C | -1.588735 | -8.711886 | -0.264808 |
| C | -0.805139 | -8.231648 | -1.306741 |
| C | -0.491834 | -6.878838 | -1.358713 |
| H | -4.811418 | -8.389413 | 0.741361  |
| H | -4.827186 | -9.455180 | 2.153286  |
| C | -4.209751 | -9.094891 | 1.323101  |
| C | -2.917185 | -8.458869 | 1.858300  |
| C | -2.127579 | -9.483862 | 2.685196  |

|    |           |            |           |
|----|-----------|------------|-----------|
| N  | -2.163412 | -5.605930  | 1.718446  |
| Zn | -0.983727 | -5.276365  | 3.269522  |
| O  | 1.024463  | -5.355186  | 3.175814  |
| C  | 1.881977  | -4.396899  | 3.752996  |
| C  | -1.874849 | -5.016767  | 6.842136  |
| C  | -3.174510 | -4.837863  | 7.643440  |
| H  | 0.015464  | -6.089510  | 7.021503  |
| H  | -3.629007 | -5.811202  | 7.859403  |
| H  | -2.980246 | -4.338152  | 8.599563  |
| H  | -3.910105 | -4.238350  | 7.098485  |
| H  | 2.587772  | -4.886786  | 4.436288  |
| H  | -1.370912 | -6.927388  | 7.723011  |
| H  | -2.130466 | -5.509231  | 5.899730  |
| H  | 1.342590  | -3.641525  | 4.337737  |
| H  | 2.461022  | -3.882553  | 2.971480  |
| O  | -0.405756 | -6.894380  | 4.350736  |
| C  | 0.806897  | -6.996686  | 4.008025  |
| O  | 1.744382  | -6.988986  | 4.994584  |
| O  | 1.075812  | -7.825976  | 2.965998  |
| C  | 2.372893  | -7.759362  | 2.358937  |
| H  | 2.474025  | -8.715586  | 1.840354  |
| H  | 2.362024  | -6.953401  | 1.621020  |
| C  | 2.887205  | -7.824748  | 4.774047  |
| H  | 3.583390  | -7.584120  | 5.580061  |
| H  | 2.584679  | -8.874912  | 4.874758  |
| H  | -0.656306 | -5.562258  | 8.582424  |
| H  | -0.491579 | -3.385959  | 8.491966  |
| H  | 0.468607  | -1.153915  | 8.043850  |
| H  | 0.220614  | -0.135243  | 5.807032  |
| H  | -1.002038 | 0.992462   | 4.267772  |
| H  | -2.600338 | 0.246058   | 4.281447  |
| H  | -1.846472 | 0.708478   | 2.744623  |
| H  | 0.236113  | -0.471729  | 1.932720  |
| H  | 1.063667  | -0.383101  | 3.494801  |
| H  | 0.807284  | -1.951377  | 2.719301  |
| H  | -1.641198 | -1.713133  | 2.977668  |
| H  | -3.974035 | -1.542765  | 4.031686  |
| H  | -3.762605 | -2.428974  | 5.541880  |
| H  | -5.124981 | -2.806920  | 4.460858  |
| H  | -4.856915 | -3.757828  | 2.434712  |
| H  | 1.195322  | -4.701399  | 0.778602  |
| H  | 1.185325  | -3.251437  | -0.250557 |
| H  | -1.122312 | -3.982292  | 0.298134  |
| H  | -0.764423 | -2.826019  | -1.833943 |
| H  | -2.035151 | -4.042858  | -2.042607 |
| H  | -0.408117 | -4.344528  | -2.660315 |
| H  | -3.759349 | -4.840289  | -0.454079 |
| H  | -4.380157 | -6.311007  | 0.269608  |
| H  | 0.120929  | -6.502958  | -2.174403 |
| H  | -0.441689 | -8.908307  | -2.075761 |
| H  | -1.832527 | -9.770615  | -0.224736 |
| H  | -3.198461 | -7.643029  | 2.531300  |
| H  | -1.230995 | -9.034493  | 3.115178  |
| H  | -2.748098 | -9.865563  | 3.504040  |
| H  | -1.826855 | -10.340879 | 2.071172  |
| H  | -3.994458 | -9.953388  | 0.676908  |
| C  | 3.478561  | -7.558505  | 3.401722  |
| H  | 3.865161  | -6.535920  | 3.370148  |
| H  | 4.320611  | -8.234124  | 3.217905  |
| C  | -0.907646 | -5.944628  | 7.586281  |

### B<sub>TMC</sub>

G = -1962,089234 u.a.

|   |           |           |          |
|---|-----------|-----------|----------|
| C | -0.606331 | 0.034072  | 3.490463 |
| C | 1.376518  | -1.532879 | 3.538066 |
| C | -0.145304 | -1.415001 | 3.706390 |
| C | -3.956950 | -2.230012 | 4.140537 |
| C | -0.595943 | -1.958082 | 5.054519 |
| C | -0.099839 | -1.375845 | 6.225321 |

|    |           |           |           |
|----|-----------|-----------|-----------|
| C  | -0.464968 | -1.848125 | 7.479457  |
| C  | -1.340797 | -2.923028 | 7.579537  |
| C  | -1.873571 | -3.535392 | 6.441744  |
| C  | -1.496792 | -3.038616 | 5.172726  |
| N  | -1.988203 | -3.687192 | 3.991314  |
| C  | -3.175694 | -3.345080 | 3.486202  |
| C  | -3.789005 | -3.980565 | 2.390082  |
| C  | -3.354198 | -5.058545 | 1.598746  |
| C  | 0.356729  | -4.523340 | -0.841601 |
| C  | -1.105363 | -4.985721 | -0.911665 |
| H  | 0.991031  | -5.132043 | -1.496190 |
| H  | -5.291262 | -5.081879 | 0.649672  |
| C  | -4.305721 | -5.532834 | 0.525166  |
| C  | -1.663411 | -4.793315 | -2.328862 |
| C  | -1.247051 | -6.418388 | -0.414651 |
| C  | -1.794137 | -6.729532 | 0.852390  |
| C  | -1.897937 | -8.070525 | 1.286084  |
| C  | -1.430722 | -9.082174 | 0.440568  |
| C  | -0.878567 | -8.790971 | -0.800346 |
| C  | -0.794171 | -7.467997 | -1.219027 |
| H  | -4.516957 | -8.811121 | 1.808459  |
| H  | -4.239724 | -9.518683 | 3.408708  |
| C  | -3.773919 | -9.309788 | 2.439408  |
| C  | -2.513928 | -8.450700 | 2.625159  |
| C  | -1.500475 | -9.151802 | 3.541340  |
| N  | -2.175974 | -5.672431 | 1.740429  |
| Zn | -0.987890 | -5.183736 | 3.221217  |
| O  | 2.089269  | -4.915491 | 4.732886  |
| C  | 2.192676  | -5.410150 | 6.057468  |
| C  | -2.804201 | -4.730211 | 6.601083  |
| C  | -3.942359 | -4.465528 | 7.596264  |
| H  | -1.237893 | -6.223325 | 6.268866  |
| H  | -4.642772 | -5.307668 | 7.602536  |
| H  | -3.569193 | -4.347057 | 8.619146  |
| H  | -4.504261 | -3.560269 | 7.343539  |
| H  | 2.956325  | -6.192705 | 6.130989  |
| H  | -2.683582 | -6.851486 | 7.085821  |
| H  | -3.263986 | -4.929835 | 5.627634  |
| H  | 1.233102  | -5.805323 | 6.406644  |
| H  | 2.479129  | -4.560224 | 6.680408  |
| O  | 0.329719  | -6.224135 | 4.035491  |
| C  | 1.589544  | -5.834250 | 3.799672  |
| O  | 2.489234  | -6.918527 | 3.778823  |
| O  | 1.622404  | -5.146808 | 2.551723  |
| C  | 2.912793  | -5.199552 | 1.938341  |
| H  | 2.892860  | -4.492379 | 1.106198  |
| H  | 3.662236  | -4.863120 | 2.662746  |
| C  | 2.527013  | -7.566528 | 2.513977  |
| H  | 3.092086  | -8.490439 | 2.660322  |
| H  | 1.511325  | -7.834348 | 2.199605  |
| H  | -1.528232 | -5.845159 | 7.973201  |
| H  | -1.615632 | -3.297286 | 8.562185  |
| H  | -0.065066 | -1.383607 | 8.376823  |
| H  | 0.591641  | -0.540567 | 6.148927  |
| H  | -0.165126 | 0.706799  | 4.234321  |
| H  | -1.694386 | 0.133032  | 3.560026  |
| H  | -0.300130 | 0.389612  | 2.500283  |
| H  | 1.672060  | -1.221081 | 2.529771  |
| H  | 1.904518  | -0.886794 | 4.248724  |
| H  | 1.713678  | -2.559650 | 3.700280  |
| H  | -0.612586 | -2.028846 | 2.929267  |
| H  | -3.324383 | -1.357450 | 4.320609  |
| H  | -4.332267 | -2.550298 | 5.118309  |
| H  | -4.808714 | -1.933639 | 3.526576  |
| H  | -4.763995 | -3.588268 | 2.126908  |
| H  | 0.741326  | -4.607592 | 0.177628  |
| H  | 0.448682  | -3.479016 | -1.161257 |
| H  | -1.677228 | -4.337308 | -0.240820 |
| H  | -1.645371 | -3.732736 | -2.601826 |
| H  | -2.695845 | -5.147421 | -2.415854 |

|   |           |            |           |
|---|-----------|------------|-----------|
| H | -1.069153 | -5.330227  | -3.076082 |
| H | -3.933308 | -5.272685  | -0.470497 |
| H | -4.406263 | -6.621476  | 0.547932  |
| H | -0.364284 | -7.243646  | -2.191728 |
| H | -0.519084 | -9.591455  | -1.441343 |
| H | -1.503801 | -10.117380 | 0.763980  |
| H | -2.823878 | -7.525373  | 3.122511  |
| H | -0.637009 | -8.510194  | 3.738712  |
| H | -1.966987 | -9.401565  | 4.501015  |
| H | -1.144211 | -10.087910 | 3.096302  |
| H | -3.536531 | -10.272271 | 1.973097  |
| C | 3.189770  | -6.635987  | 1.484824  |
| H | 4.271652  | -6.802273  | 1.430245  |
| H | 2.772553  | -6.823492  | 0.489508  |
| C | -2.015320 | -5.986808  | 7.001643  |

TS(B<sub>TMC</sub>→C<sub>TMC</sub>)

G = -1962,078512 u.a.

|   |           |          |           |
|---|-----------|----------|-----------|
| H | 1.696308  | 3.587567 | -1.697338 |
| C | 1.944342  | 2.558945 | -1.416414 |
| H | 2.371820  | 2.061926 | -2.294216 |
| H | 1.003598  | 2.050081 | -1.179061 |
| C | 2.927857  | 2.497514 | -0.237100 |
| H | 0.611415  | 2.150697 | 1.086371  |
| C | 1.185943  | 2.966208 | 1.518300  |
| C | 3.221055  | 1.035487 | 0.131367  |
| H | 3.596206  | 0.493724 | -0.744675 |
| H | 2.311670  | 0.526184 | 0.470992  |
| H | 3.966907  | 0.968739 | 0.925417  |
| H | 3.870828  | 2.947113 | -0.564311 |
| C | 0.673585  | 3.659862 | 2.608044  |
| C | 2.426198  | 3.292196 | 0.961217  |
| C | 3.163302  | 4.351870 | 1.538004  |
| C | 1.406348  | 4.703912 | 3.160053  |
| C | 2.654053  | 5.068456 | 2.645163  |
| H | 1.002802  | 5.252148 | 4.007908  |
| N | 4.466581  | 4.672914 | 1.035757  |
| C | 4.597310  | 5.513267 | 0.011554  |
| C | 3.364280  | 6.125828 | -0.612996 |
| H | 2.634157  | 6.417407 | 0.144788  |
| H | 3.624354  | 6.997675 | -1.215657 |
| H | 2.869937  | 5.398168 | -1.265050 |
| C | 3.407132  | 6.229908 | 3.278810  |
| H | 4.353521  | 6.341435 | 2.740206  |
| C | 3.746443  | 5.949879 | 4.749144  |
| H | 4.317212  | 6.783562 | 5.174766  |
| H | 4.345478  | 5.039533 | 4.834267  |
| H | 2.840223  | 5.829967 | 5.353857  |
| C | 2.636329  | 7.551251 | 3.139323  |
| H | 3.219684  | 8.380606 | 3.554900  |
| H | 2.416788  | 7.786612 | 2.093110  |
| H | 1.682305  | 7.516483 | 3.677363  |
| C | 5.826091  | 5.871362 | -0.577027 |
| H | 5.740542  | 6.541074 | -1.424813 |
| C | 7.141592  | 5.488397 | -0.268124 |
| H | 7.876952  | 6.924356 | -1.701391 |
| C | 8.203885  | 6.001898 | -1.217430 |
| H | 9.159436  | 6.176805 | -0.721009 |
| H | 8.378943  | 5.259349 | -2.004043 |
| N | 7.491751  | 4.699472 | 0.753552  |
| C | 8.874734  | 4.425383 | 0.994878  |
| C | 9.519951  | 3.358965 | 0.329169  |
| C | 10.864209 | 3.105768 | 0.624984  |
| C | 11.563157 | 3.879497 | 1.541539  |
| C | 10.914429 | 4.920526 | 2.197531  |
| H | 10.425409 | 7.013134 | 4.100433  |
| C | 9.568863  | 5.208321 | 1.951934  |
| H | 8.776265  | 7.240336 | 4.670173  |
| H | 9.499221  | 5.621580 | 4.678672  |

|    |           |          |           |
|----|-----------|----------|-----------|
| C  | 9.428929  | 6.557470 | 4.116331  |
| C  | 8.877292  | 6.341312 | 2.701614  |
| H  | 8.458025  | 8.468016 | 2.512399  |
| C  | 8.927962  | 7.669055 | 1.927941  |
| H  | 8.403569  | 7.608657 | 0.972112  |
| H  | 9.965293  | 7.962381 | 1.730503  |
| H  | 11.463908 | 5.515257 | 2.920790  |
| H  | 12.608951 | 3.670406 | 1.750213  |
| H  | 11.370975 | 2.286456 | 0.121529  |
| H  | 10.513075 | 1.953574 | -1.960863 |
| C  | 9.540440  | 2.451905 | -2.038971 |
| H  | 9.718994  | 3.458549 | -2.429813 |
| Zn | 6.075360  | 3.831186 | 1.838281  |
| H  | 7.811770  | 2.894882 | -0.854245 |
| C  | 8.809571  | 2.476507 | -0.687937 |
| H  | 8.950606  | 1.899652 | -2.778483 |
| C  | 8.622525  | 1.047780 | -0.155234 |
| H  | 8.008528  | 1.041664 | 0.748672  |
| H  | 8.122371  | 0.425136 | -0.905636 |
| H  | 9.589460  | 0.582980 | 0.070531  |
| O  | 6.148014  | 1.812878 | 2.088350  |
| C  | 5.717672  | 1.725020 | 3.285263  |
| O  | 5.985182  | 3.462534 | 3.829247  |
| O  | 6.395371  | 1.037307 | 4.236453  |
| O  | 4.388034  | 1.591896 | 3.433078  |
| C  | 3.863306  | 1.552184 | 4.756197  |
| H  | 2.779560  | 1.581214 | 4.641056  |
| H  | 4.164083  | 0.637092 | 5.273741  |
| H  | 4.197465  | 2.427810 | 5.319081  |
| C  | 7.822431  | 1.196233 | 4.209735  |
| H  | 8.220353  | 0.742956 | 3.297390  |
| H  | 8.158611  | 0.608184 | 5.066915  |
| C  | 7.040496  | 3.532086 | 4.763235  |
| H  | 6.672115  | 3.191212 | 5.743550  |
| H  | 7.353683  | 4.576807 | 4.884717  |
| H  | 7.819799  | 6.063131 | 2.793979  |
| H  | -0.295027 | 3.391540 | 3.021812  |
| C  | 8.230700  | 2.670633 | 4.338559  |
| H  | 9.039633  | 2.770447 | 5.072107  |
| H  | 8.619941  | 3.044520 | 3.386536  |

### C<sub>TMC</sub>

G = -1962,088219 u.a.

|   |          |          |           |
|---|----------|----------|-----------|
| H | 1.559924 | 3.720761 | -1.591368 |
| C | 1.869608 | 2.689474 | -1.395488 |
| H | 2.273968 | 2.272942 | -2.324629 |
| H | 0.966351 | 2.120124 | -1.150117 |
| C | 2.913381 | 2.597138 | -0.270454 |
| H | 0.652179 | 2.155035 | 1.106290  |
| C | 1.229535 | 2.955919 | 1.561373  |
| C | 3.257588 | 1.126096 | 0.003103  |
| H | 3.571144 | 0.632867 | -0.924371 |
| H | 2.387963 | 0.582982 | 0.390643  |
| H | 4.066982 | 1.040952 | 0.729045  |
| H | 3.829598 | 3.081818 | -0.621023 |
| C | 0.737138 | 3.592347 | 2.694839  |
| C | 2.450600 | 3.322741 | 0.987499  |
| C | 3.195355 | 4.360775 | 1.597197  |
| C | 1.466861 | 4.627607 | 3.267317  |
| C | 2.696089 | 5.032313 | 2.737512  |
| H | 1.072645 | 5.143067 | 4.139656  |
| N | 4.493156 | 4.702697 | 1.097156  |
| C | 4.613574 | 5.484948 | 0.026347  |
| C | 3.379784 | 6.077625 | -0.617665 |
| H | 2.600516 | 6.284057 | 0.118317  |
| H | 3.630544 | 7.000952 | -1.143836 |
| H | 2.958821 | 5.381663 | -1.350679 |
| C | 3.420160 | 6.212965 | 3.369511  |
| H | 4.368075 | 6.342214 | 2.837671  |

|    |           |          |           |
|----|-----------|----------|-----------|
| C  | 3.756193  | 5.967767 | 4.846039  |
| H  | 4.267099  | 6.842272 | 5.265669  |
| H  | 4.421943  | 5.105940 | 4.942409  |
| H  | 2.852600  | 5.799281 | 5.443575  |
| C  | 2.614385  | 7.509896 | 3.194725  |
| H  | 3.171819  | 8.363486 | 3.596486  |
| H  | 2.396926  | 7.715071 | 2.141507  |
| H  | 1.657229  | 7.459636 | 3.726239  |
| C  | 5.834707  | 5.809895 | -0.595203 |
| H  | 5.737892  | 6.436643 | -1.474334 |
| C  | 7.153026  | 5.438014 | -0.284817 |
| H  | 7.862998  | 6.779063 | -1.817635 |
| C  | 8.204083  | 5.895936 | -1.273793 |
| H  | 9.157785  | 6.119045 | -0.792753 |
| H  | 8.387656  | 5.104707 | -2.008877 |
| N  | 7.513552  | 4.718918 | 0.782606  |
| C  | 8.899141  | 4.466478 | 1.032747  |
| C  | 9.560141  | 3.389695 | 0.398708  |
| C  | 10.905429 | 3.157352 | 0.708182  |
| C  | 11.589888 | 3.959067 | 1.610434  |
| C  | 10.926800 | 5.011282 | 2.233864  |
| H  | 10.475584 | 7.302430 | 3.908307  |
| C  | 9.581776  | 5.284247 | 1.970342  |
| H  | 8.851864  | 7.502200 | 4.559858  |
| H  | 9.652148  | 5.926674 | 4.662065  |
| C  | 9.505983  | 6.805048 | 4.026487  |
| C  | 8.881889  | 6.443191 | 2.673187  |
| H  | 8.348077  | 8.525764 | 2.346852  |
| C  | 8.820507  | 7.704784 | 1.795935  |
| H  | 8.242145  | 7.546122 | 0.883899  |
| H  | 9.828858  | 8.027441 | 1.512156  |
| H  | 11.467166 | 5.629719 | 2.943474  |
| H  | 12.635889 | 3.765060 | 1.832493  |
| H  | 11.423668 | 2.331037 | 0.228243  |
| H  | 10.585495 | 1.924432 | -1.842191 |
| C  | 9.609352  | 2.411819 | -1.942244 |
| H  | 9.783684  | 3.407919 | -2.360507 |
| Zn | 6.123190  | 4.054189 | 2.041092  |
| H  | 7.864843  | 2.864815 | -0.780839 |
| C  | 8.868388  | 2.468444 | -0.597340 |
| H  | 9.030213  | 1.833542 | -2.670363 |
| C  | 8.702855  | 1.051780 | -0.026816 |
| H  | 8.090373  | 1.059756 | 0.877480  |
| H  | 8.211139  | 0.401523 | -0.759227 |
| H  | 9.676597  | 0.608048 | 0.211270  |
| O  | 6.080432  | 1.704112 | 2.090539  |
| C  | 5.540734  | 1.442388 | 3.162854  |
| O  | 6.146041  | 3.842589 | 3.911299  |
| O  | 6.153480  | 1.000047 | 4.248872  |
| O  | 4.226889  | 1.504144 | 3.291422  |
| C  | 3.648357  | 1.445724 | 4.601350  |
| H  | 2.587359  | 1.636041 | 4.446300  |
| H  | 3.802362  | 0.462217 | 5.052121  |
| H  | 4.085986  | 2.223931 | 5.228874  |
| C  | 7.599283  | 1.050749 | 4.269479  |
| H  | 7.982102  | 0.373103 | 3.500114  |
| H  | 7.831052  | 0.630545 | 5.250863  |
| C  | 7.286004  | 3.583560 | 4.671319  |
| H  | 6.977240  | 3.318370 | 5.699132  |
| H  | 7.923302  | 4.478529 | 4.771312  |
| H  | 7.847697  | 6.127823 | 2.863265  |
| H  | -0.217702 | 3.293576 | 3.119963  |
| C  | 8.176297  | 2.456777 | 4.123297  |
| H  | 9.139426  | 2.463871 | 4.650853  |
| H  | 8.402638  | 2.667798 | 3.073428  |

TS(C<sub>TMC</sub>→D<sub>TMC</sub>)

G = -1962,085977 u.a.

C -0.963364 -1.691452 2.941696

|    |           |           |           |
|----|-----------|-----------|-----------|
| H  | -1.151330 | -0.646631 | 3.208441  |
| H  | -1.623310 | -2.304478 | 3.559147  |
| H  | 0.074583  | -1.918379 | 3.192074  |
| C  | -1.215685 | -1.917980 | 1.468548  |
| H  | -3.824486 | -5.604614 | 4.006434  |
| C  | -3.011737 | -5.375220 | 3.308187  |
| C  | -0.074474 | -1.881748 | 0.642710  |
| H  | -2.532856 | -6.322366 | 3.035805  |
| H  | -2.276273 | -4.767411 | 3.845216  |
| H  | 0.852437  | -1.669326 | 1.161956  |
| H  | -2.557643 | 0.843518  | 3.891196  |
| H  | -2.631707 | 2.270493  | 2.840944  |
| H  | -4.080651 | 1.704537  | 3.672250  |
| C  | -3.173256 | 1.371951  | 3.156204  |
| C  | -3.510868 | 0.499243  | 1.935614  |
| C  | -4.104953 | -0.841406 | 2.350779  |
| H  | -2.578654 | 0.303454  | 1.396435  |
| C  | -5.236581 | -0.847463 | 3.172106  |
| H  | -6.691991 | -2.011225 | 4.250340  |
| C  | -5.815644 | -2.033468 | 3.607679  |
| H  | -5.671072 | 0.100888  | 3.477119  |
| H  | -3.977136 | 2.234977  | 0.720216  |
| C  | -4.432523 | 1.272448  | 0.981341  |
| H  | -5.399245 | 1.480811  | 1.453829  |
| H  | -4.617600 | 0.718056  | 0.059609  |
| C  | -5.255815 | -3.247000 | 3.226906  |
| H  | -5.696945 | -4.175652 | 3.580523  |
| C  | -3.560808 | -2.085838 | 1.952780  |
| C  | -4.128330 | -3.300654 | 2.401770  |
| N  | -2.458768 | -2.130207 | 1.035764  |
| C  | -3.535004 | -4.658912 | 2.053521  |
| H  | -2.674649 | -4.488962 | 1.397608  |
| H  | -0.961673 | -0.154149 | -2.503921 |
| C  | -4.528656 | -5.542563 | 1.287100  |
| H  | -5.428835 | -5.739675 | 1.880573  |
| Zn | -2.778586 | -2.631544 | -0.851394 |
| H  | -4.818950 | -5.064790 | 0.346963  |
| H  | -4.071612 | -6.511020 | 1.052937  |
| N  | -0.954288 | -2.399743 | -1.554930 |
| C  | 0.057344  | -2.091023 | -0.738046 |
| H  | 2.180991  | -1.754454 | -0.534547 |
| C  | 1.449288  | -1.975859 | -1.312641 |
| H  | 1.488171  | -1.181274 | -2.063492 |
| H  | 1.743731  | -2.899691 | -1.819151 |
| C  | -0.714044 | -2.726787 | -2.928314 |
| C  | -0.824388 | -1.731742 | -3.926059 |
| C  | -0.751199 | -2.126847 | -5.266480 |
| H  | -0.844213 | -1.374294 | -6.045567 |
| H  | -0.518133 | -3.742210 | -6.669167 |
| C  | -0.560158 | -3.456339 | -5.621560 |
| C  | -0.394618 | -4.415110 | -4.627849 |
| H  | -1.579641 | -6.630097 | -3.017268 |
| H  | -0.209980 | -5.448656 | -4.909165 |
| C  | -1.364477 | -6.124681 | -2.068934 |
| H  | -2.276157 | -5.616273 | -1.742328 |
| C  | -0.450986 | -4.074883 | -3.273356 |
| C  | -0.192197 | -5.144700 | -2.217678 |
| H  | -0.072684 | -4.638500 | -1.254565 |
| H  | -1.126269 | -6.895036 | -1.326792 |
| C  | 1.111210  | -5.910130 | -2.492182 |
| H  | 1.337615  | -6.582106 | -1.657310 |
| H  | 1.961527  | -5.232908 | -2.622303 |
| H  | 1.039028  | -6.526139 | -3.394983 |
| H  | 0.176182  | 1.589391  | -3.801591 |
| C  | 0.227233  | 0.549709  | -4.142669 |
| H  | 1.187897  | 0.134487  | -3.821753 |
| H  | 0.227757  | 0.562554  | -5.238240 |
| C  | -0.965725 | -0.251351 | -3.594378 |
| C  | -2.280780 | 0.353876  | -4.105540 |
| H  | -2.377755 | 0.231679  | -5.190634 |

|   |           |           |           |
|---|-----------|-----------|-----------|
| H | -2.306761 | 1.428369  | -3.892186 |
| H | -3.152553 | -0.094424 | -3.623497 |
| O | -4.257831 | -3.548314 | -1.469301 |
| O | -4.846444 | -0.568831 | -1.966956 |
| C | -5.796204 | -1.275341 | -1.690427 |
| O | -6.313664 | -1.298349 | -0.465560 |
| C | -7.279709 | -2.302582 | -0.138080 |
| H | -7.453859 | -2.188876 | 0.931422  |
| H | -8.208107 | -2.149416 | -0.694948 |
| H | -6.872690 | -3.292532 | -0.350907 |
| O | -6.470981 | -2.044008 | -2.546340 |
| C | -5.889910 | -2.206374 | -3.854033 |
| H | -6.654312 | -2.776156 | -4.388744 |
| H | -5.356206 | -4.657284 | -2.775703 |
| C | -4.440391 | -4.041353 | -2.769308 |
| H | -3.620398 | -4.708854 | -3.076757 |
| H | -5.791322 | -1.222369 | -4.323699 |
| C | -4.561412 | -2.956015 | -3.843973 |
| H | -3.727047 | -2.259748 | -3.722810 |
| H | -4.440346 | -3.412469 | -4.835564 |

### D<sub>TMC</sub>

G = -1962,102449 u.a.

|    |           |           |           |
|----|-----------|-----------|-----------|
| C  | 0.022371  | -4.087381 | -3.298981 |
| C  | -0.148236 | -2.770854 | -2.815580 |
| C  | -0.043643 | -1.659888 | -3.682589 |
| C  | 0.222369  | -1.894267 | -5.034930 |
| C  | 0.385722  | -3.184148 | -5.526186 |
| C  | 0.287598  | -4.266480 | -4.659998 |
| N  | -0.522248 | -2.560694 | -1.448632 |
| C  | 0.407331  | -2.412179 | -0.499823 |
| C  | 1.863483  | -2.470784 | -0.894916 |
| C  | -0.244724 | -0.233548 | -3.190823 |
| C  | -1.600087 | 0.321160  | -3.655853 |
| C  | -0.107871 | -5.303189 | -2.392393 |
| C  | 1.096056  | -6.249116 | -2.500163 |
| Zn | -2.419126 | -2.451471 | -1.008874 |
| O  | -3.983755 | -2.477476 | -1.941645 |
| C  | -4.125056 | -2.901322 | -3.273321 |
| C  | -5.428002 | -2.358640 | -3.859650 |
| C  | -6.632315 | -2.817639 | -3.057950 |
| O  | -7.856363 | -2.230912 | -3.555502 |
| C  | -8.422255 | -2.861121 | -4.596171 |
| O  | -9.535859 | -2.239357 | -5.013185 |
| C  | -9.961983 | -1.049151 | -4.350168 |
| N  | -2.298814 | -2.160235 | 0.921981  |
| C  | -3.508112 | -2.034388 | 1.681420  |
| C  | -4.106107 | -0.764286 | 1.831458  |
| C  | -5.314468 | -0.676440 | 2.528884  |
| C  | -5.924204 | -1.805159 | 3.062990  |
| C  | -5.331939 | -3.050947 | 2.892711  |
| C  | -4.124819 | -3.193228 | 2.202428  |
| C  | -3.502949 | 0.486443  | 1.209844  |
| C  | -4.315646 | 0.915287  | -0.022507 |
| C  | -3.543948 | -4.581121 | 1.976781  |
| C  | -4.349950 | -5.324153 | 0.899028  |
| C  | -3.369720 | 1.643237  | 2.208969  |
| C  | -1.111789 | -2.085049 | 1.525621  |
| C  | 0.124778  | -2.199526 | 0.860314  |
| C  | -1.063415 | -1.858505 | 3.017975  |
| C  | -3.454360 | -5.410916 | 3.263667  |
| C  | -1.416044 | -6.058562 | -2.670987 |
| C  | 0.898309  | 0.700504  | -3.610804 |
| O  | -8.021914 | -3.869330 | -5.124191 |
| H  | -1.548634 | -0.913359 | 3.281314  |
| H  | -1.609666 | -2.645006 | 3.547497  |
| H  | -0.035386 | -1.838050 | 3.381959  |
| H  | -4.444670 | -5.644175 | 3.669256  |
| H  | -2.952996 | -6.364321 | 3.065333  |

|   |            |           |           |
|---|------------|-----------|-----------|
| H | -2.891029  | -4.889000 | 4.044125  |
| H | 0.995415   | -2.106496 | 1.497946  |
| H | -2.795330  | 1.350817  | 3.094114  |
| H | -2.859665  | 2.492152  | 1.740968  |
| H | -4.346624  | 2.000407  | 2.552179  |
| H | -2.493583  | 0.234381  | 0.867885  |
| H | -6.863205  | -1.715678 | 3.602442  |
| H | -5.788644  | 0.294186  | 2.647960  |
| H | -3.850324  | 1.778580  | -0.511912 |
| H | -5.333649  | 1.202333  | 0.264766  |
| H | -4.393908  | 0.103126  | -0.752217 |
| H | -5.820356  | -3.934044 | 3.296005  |
| H | -2.524121  | -4.457523 | 1.598081  |
| H | -0.258754  | -0.258816 | -2.096308 |
| H | -5.378603  | -5.498039 | 1.234445  |
| H | -4.400989  | -4.746710 | -0.029735 |
| H | -3.899284  | -6.298420 | 0.678425  |
| H | 2.513437   | -2.313733 | -0.033126 |
| H | 2.090192   | -1.711304 | -1.649656 |
| H | 2.106034   | -3.438472 | -1.344870 |
| H | 0.297630   | -1.050470 | -5.715720 |
| H | 0.588034   | -3.345541 | -6.581432 |
| H | -1.440103  | -6.437104 | -3.698734 |
| H | 0.412979   | -5.273662 | -5.048911 |
| H | -2.289122  | -5.412129 | -2.538289 |
| H | -0.150456  | -4.944790 | -1.358814 |
| H | -1.520942  | -6.914353 | -1.994978 |
| H | 1.008400   | -7.058605 | -1.767600 |
| H | 2.040434   | -5.726979 | -2.315602 |
| H | 1.163012   | -6.712166 | -3.490433 |
| H | 0.765004   | 1.689258  | -3.158914 |
| H | 1.873290   | 0.314112  | -3.296655 |
| H | 0.932348   | 0.841322  | -4.696428 |
| H | -1.655192  | 0.353876  | -4.749699 |
| H | -1.750212  | 1.339980  | -3.281477 |
| H | -2.431612  | -0.295356 | -3.299485 |
| H | -10.872063 | -0.740891 | -4.866651 |
| H | -10.178240 | -1.237860 | -3.295175 |
| H | -9.207021  | -0.261755 | -4.423918 |
| H | -6.557729  | -2.480584 | -2.023930 |
| H | -4.145127  | -4.004547 | -3.340851 |
| H | -3.293785  | -2.570527 | -3.917551 |
| H | -6.731756  | -3.906585 | -3.086562 |
| H | -5.530858  | -2.699256 | -4.896617 |
| H | -5.394536  | -1.262361 | -3.861446 |

### Study of Propagation step of the TMC ROP reaction

$E_{TMC}$

$G = -2343,578799$  u.a.

|    |           |           |           |
|----|-----------|-----------|-----------|
| O  | -2.580203 | -1.788093 | 4.323332  |
| C  | -1.818144 | -2.362011 | 3.399182  |
| O  | -0.702821 | -1.785160 | 2.983694  |
| C  | -0.237426 | -0.512115 | 3.483924  |
| C  | -1.382568 | 0.309482  | 4.026174  |
| C  | -2.182399 | -0.555668 | 4.971700  |
| O  | -2.159064 | -3.440499 | 2.931447  |
| Zn | -1.906551 | -3.900224 | 0.776191  |
| O  | -2.540776 | -2.216981 | 0.232064  |
| C  | -3.804630 | -1.771118 | 0.617479  |
| C  | -3.883085 | -0.250302 | 0.458347  |
| C  | -5.238688 | 0.355151  | 0.774378  |
| O  | -5.750472 | -0.043628 | 2.072568  |
| C  | -5.197660 | 0.538860  | 3.136614  |
| O  | -5.697195 | 0.071796  | 4.289147  |
| C  | -6.690472 | -0.959483 | 4.254576  |
| N  | -2.932544 | -5.565942 | 0.327091  |
| C  | -2.308510 | -6.656933 | -0.107888 |

|   |           |           |           |
|---|-----------|-----------|-----------|
| C | -0.911149 | -6.776862 | -0.237903 |
| C | 0.113112  | -5.847550 | 0.013789  |
| C | 1.498928  | -6.266881 | -0.430992 |
| C | -4.356699 | -5.469902 | 0.259910  |
| C | -5.126274 | -5.653417 | 1.431869  |
| C | -6.510140 | -5.464980 | 1.359040  |
| C | -7.128552 | -5.091858 | 0.172080  |
| C | -6.361333 | -4.920953 | -0.974610 |
| C | -4.976547 | -5.113018 | -0.962650 |
| C | -4.497918 | -6.094786 | 2.746289  |
| C | -4.890157 | -5.190297 | 3.921179  |
| C | -4.189770 | -4.925122 | -2.254702 |
| C | -4.051258 | -3.441115 | -2.626218 |
| C | -3.114750 | -7.857165 | -0.555287 |
| C | -4.795993 | -5.720876 | -3.420206 |
| C | -4.846167 | -7.558374 | 3.061417  |
| N | -0.067695 | -4.638429 | 0.550967  |
| C | 1.067566  | -3.827757 | 0.865462  |
| C | 1.564720  | -2.900788 | -0.076327 |
| C | 2.652377  | -2.098625 | 0.286947  |
| C | 3.250411  | -2.212270 | 1.535431  |
| C | 2.747558  | -3.125924 | 2.456644  |
| C | 1.647757  | -3.933809 | 2.154139  |
| C | 0.954359  | -2.745658 | -1.461638 |
| C | 2.004474  | -2.888437 | -2.573047 |
| C | 1.097777  | -4.898641 | 3.198356  |
| C | 1.139104  | -4.329504 | 4.622297  |
| C | 0.197460  | -1.414957 | -1.593816 |
| C | 1.815898  | -6.257830 | 3.176671  |
| O | -4.343000 | 1.396945  | 3.125017  |
| H | 0.866990  | -0.565719 | -1.410989 |
| H | 1.569569  | -7.352227 | -0.525467 |
| H | 1.681361  | -6.778650 | 2.226434  |
| H | 1.424048  | -6.908753 | 3.966628  |
| H | -4.598137 | -4.154500 | 3.734362  |
| H | -4.360235 | -7.878372 | 3.990146  |
| H | -5.927267 | -7.687972 | 3.187729  |
| H | -4.522486 | -8.235193 | 2.264949  |
| H | -4.382048 | -5.519247 | 4.834510  |
| H | -3.412182 | -6.026515 | 2.628808  |
| H | 0.512837  | -0.726765 | 4.253124  |
| H | 0.260856  | -0.046805 | 2.632576  |
| H | -3.119543 | -0.083698 | 5.267258  |
| H | -1.610192 | -0.826219 | 5.867124  |
| H | -5.967978 | -5.223864 | 4.118175  |
| H | -7.113049 | -5.616129 | 2.251004  |
| H | -8.204720 | -4.943391 | 0.137657  |
| H | -6.847712 | -4.634936 | -1.903712 |
| H | -5.771998 | -5.323300 | -3.719616 |
| H | -4.935465 | -6.776987 | -3.166705 |
| H | -4.141592 | -5.664747 | -4.296984 |
| H | -3.503951 | -3.336940 | -3.570652 |
| H | -5.036259 | -2.978606 | -2.760823 |
| H | -3.506353 | -2.891666 | -1.851915 |
| H | -3.177489 | -5.306383 | -2.089881 |
| H | -3.402267 | -7.750214 | -1.607156 |
| H | -4.036754 | -7.961479 | 0.019404  |
| H | -2.526654 | -8.772689 | -0.463110 |
| H | -0.574804 | -7.725103 | -0.641809 |
| H | -0.643047 | -1.364524 | -0.894724 |
| H | -0.203378 | -1.308166 | -2.608664 |
| H | 0.223342  | -3.550511 | -1.591857 |
| H | 1.519646  | -2.880723 | -3.555331 |
| H | 2.572658  | -3.819933 | -2.481706 |
| H | 2.723189  | -2.061539 | -2.559189 |
| H | 1.705224  | -5.830882 | -1.415657 |
| H | 2.281273  | -5.913348 | 0.242084  |
| H | 3.042758  | -1.379327 | -0.428789 |
| H | 4.105595  | -1.591870 | 1.791543  |
| H | 3.216524  | -3.207331 | 3.433478  |

|   |           |           |           |
|---|-----------|-----------|-----------|
| H | 0.047342  | -5.074663 | 2.945003  |
| H | 0.709079  | -3.325230 | 4.667705  |
| H | 0.569742  | -4.975339 | 5.299095  |
| H | 2.160774  | -4.275411 | 5.015353  |
| H | 2.891812  | -6.133681 | 3.346678  |
| H | -2.033415 | 0.671859  | 3.226179  |
| H | -0.997403 | 1.184545  | 4.558993  |
| H | -4.041845 | -2.024338 | 1.666063  |
| H | -4.611203 | -2.230391 | 0.014314  |
| H | -3.111433 | 0.220407  | 1.075385  |
| H | -3.644108 | 0.004353  | -0.582332 |
| H | -6.006328 | -0.005836 | 0.085133  |
| H | -5.205706 | 1.447918  | 0.741016  |
| H | -7.589987 | -0.618549 | 3.736065  |
| H | -6.920191 | -1.171363 | 5.299255  |
| H | -6.307469 | -1.857076 | 3.764499  |

### TS(E<sub>TMC</sub>→F<sub>TMC</sub>)

G = -2343,563192 u.a.

|    |           |           |           |
|----|-----------|-----------|-----------|
| O  | -2.913717 | -2.057922 | 4.016437  |
| C  | -1.881539 | -2.592738 | 3.299303  |
| O  | -0.717107 | -1.895173 | 3.378987  |
| C  | -0.788640 | -0.471374 | 3.219173  |
| C  | -1.883795 | 0.146859  | 4.104134  |
| C  | -2.554896 | -0.971809 | 4.882827  |
| O  | -1.773590 | -3.857703 | 3.280765  |
| Zn | -1.710689 | -4.211276 | 1.302128  |
| O  | -2.343959 | -2.294292 | 1.562476  |
| C  | -3.662273 | -1.854993 | 1.286229  |
| C  | -3.665952 | -0.468756 | 0.645911  |
| C  | -5.060337 | 0.080030  | 0.389343  |
| O  | -5.880974 | 0.100708  | 1.578899  |
| C  | -5.613431 | 1.076180  | 2.460704  |
| O  | -6.401327 | 1.008219  | 3.539996  |
| C  | -7.384544 | -0.027199 | 3.628569  |
| N  | -2.856678 | -5.579112 | 0.441872  |
| C  | -2.286031 | -6.641471 | -0.133137 |
| C  | -0.903247 | -6.801952 | -0.323050 |
| C  | 0.169760  | -5.929283 | -0.049521 |
| C  | 1.513814  | -6.348432 | -0.601732 |
| C  | -4.276382 | -5.414903 | 0.412963  |
| C  | -5.029596 | -5.630894 | 1.590858  |
| C  | -6.404813 | -5.378185 | 1.557870  |
| C  | -7.031392 | -4.917371 | 0.406745  |
| C  | -6.281667 | -4.715797 | -0.746440 |
| C  | -4.905959 | -4.963999 | -0.774231 |
| C  | -4.401020 | -6.179635 | 2.864020  |
| C  | -4.772641 | -5.369048 | 4.111384  |
| C  | -4.137415 | -4.723708 | -2.069169 |
| C  | -3.950944 | -3.225177 | -2.348827 |
| C  | -3.155561 | -7.759830 | -0.665675 |
| C  | -4.798870 | -5.408219 | -3.274554 |
| C  | -4.766846 | -7.660435 | 3.056347  |
| N  | 0.059957  | -4.779569 | 0.613656  |
| C  | 1.223845  | -3.981018 | 0.860299  |
| C  | 1.604457  | -2.991114 | -0.073047 |
| C  | 2.723782  | -2.201944 | 0.208215  |
| C  | 3.460353  | -2.383313 | 1.372442  |
| C  | 3.069652  | -3.355602 | 2.285129  |
| C  | 1.948899  | -4.161105 | 2.061193  |
| C  | 0.816849  | -2.742423 | -1.350773 |
| C  | 1.703314  | -2.756345 | -2.603459 |
| C  | 1.562251  | -5.203879 | 3.101873  |
| C  | 1.415202  | -4.592152 | 4.501429  |
| C  | 0.029194  | -1.427108 | -1.254911 |
| C  | 2.560586  | -6.371924 | 3.132072  |
| O  | -4.772184 | 1.934334  | 2.335786  |
| H  | 0.705886  | -0.572114 | -1.143490 |
| H  | 1.537654  | -7.421865 | -0.798315 |

|   |           |           |           |
|---|-----------|-----------|-----------|
| H | 2.633671  | -6.877587 | 2.164577  |
| H | 2.253725  | -7.116792 | 3.874802  |
| H | -4.476267 | -4.323073 | 4.009276  |
| H | -4.281557 | -8.060932 | 3.953257  |
| H | -5.849136 | -7.786717 | 3.176248  |
| H | -4.453615 | -8.272332 | 2.204803  |
| H | -4.251140 | -5.774851 | 4.984621  |
| H | -3.314658 | -6.118098 | 2.752705  |
| H | 0.209364  | -0.121185 | 3.488141  |
| H | -0.962317 | -0.262314 | 2.160272  |
| H | -3.489644 | -0.646555 | 5.343129  |
| H | -1.892805 | -1.356119 | 5.668192  |
| H | -5.847189 | -5.413698 | 4.323535  |
| H | -6.994640 | -5.550714 | 2.454113  |
| H | -8.100730 | -4.723446 | 0.404742  |
| H | -6.775615 | -4.361043 | -1.647532 |
| H | -5.756047 | -4.941815 | -3.531576 |
| H | -4.991621 | -6.468915 | -3.085865 |
| H | -4.153759 | -5.330565 | -4.156399 |
| H | -3.406532 | -3.073173 | -3.287650 |
| H | -4.918678 | -2.718296 | -2.437654 |
| H | -3.384345 | -2.738668 | -1.550009 |
| H | -3.137562 | -5.151797 | -1.954905 |
| H | -3.465238 | -7.552769 | -1.695734 |
| H | -4.064234 | -7.881758 | -0.073212 |
| H | -2.602212 | -8.701219 | -0.670811 |
| H | -0.620506 | -7.724642 | -0.816772 |
| H | -0.645822 | -1.437950 | -0.394003 |
| H | -0.566492 | -1.265458 | -2.161005 |
| H | 0.087797  | -3.552673 | -1.453547 |
| H | 1.088865  | -2.666069 | -3.506038 |
| H | 2.283736  | -3.681378 | -2.679323 |
| H | 2.412391  | -1.921406 | -2.608147 |
| H | 1.699176  | -5.830101 | -1.549844 |
| H | 2.333821  | -6.085385 | 0.068162  |
| H | 3.024200  | -1.434447 | -0.500696 |
| H | 4.333645  | -1.766940 | 1.569238  |
| H | 3.643928  | -3.492514 | 3.197661  |
| H | 0.584199  | -5.604923 | 2.820363  |
| H | 0.704327  | -3.764149 | 4.490164  |
| H | 1.049307  | -5.349330 | 5.203632  |
| H | 2.374027  | -4.225873 | 4.886439  |
| H | 3.564835  | -6.026253 | 3.403040  |
| H | -2.626803 | 0.675702  | 3.500485  |
| H | -1.464672 | 0.874578  | 4.807060  |
| H | -4.232291 | -1.826929 | 2.222355  |
| H | -4.171801 | -2.570974 | 0.628322  |
| H | -3.117353 | 0.236362  | 1.276824  |
| H | -3.142126 | -0.501866 | -0.317709 |
| H | -5.622057 | -0.558813 | -0.297228 |
| H | -5.010077 | 1.094214  | -0.016453 |
| H | -8.105171 | 0.042504  | 2.809817  |
| H | -7.887906 | 0.136213  | 4.582028  |
| H | -6.919137 | -1.015836 | 3.615364  |

F<sub>TMC</sub>

G = -2343,578076 u.a.

|    |           |           |           |
|----|-----------|-----------|-----------|
| O  | -2.452716 | -0.527754 | 2.261975  |
| C  | -2.647342 | -1.616473 | 1.385725  |
| O  | -1.846961 | -1.459241 | 0.221422  |
| C  | -1.658675 | -0.085408 | -0.128127 |
| C  | -0.776653 | 0.585332  | 0.930272  |
| C  | -1.100797 | -0.082723 | 2.275377  |
| O  | -2.337231 | -2.783085 | 1.967747  |
| Zn | -1.725696 | -4.128847 | 0.831288  |
| O  | -3.972795 | -1.540375 | 0.931297  |
| C  | -4.968651 | -1.572311 | 1.950081  |
| C  | -5.614782 | -0.201389 | 2.112166  |
| C  | -6.699777 | -0.172850 | 3.173640  |

|   |           |           |           |
|---|-----------|-----------|-----------|
| O | -6.158982 | -0.453508 | 4.482658  |
| C | -5.743802 | 0.620419  | 5.180773  |
| O | -5.198024 | 0.274425  | 6.352902  |
| C | -5.067770 | -1.108513 | 6.687413  |
| N | -2.736205 | -5.515031 | -0.105527 |
| C | -2.123773 | -6.637122 | -0.493578 |
| C | -0.754931 | -6.904701 | -0.307682 |
| C | 0.257865  | -6.127074 | 0.282694  |
| C | 1.634660  | -6.746024 | 0.341943  |
| C | -4.153556 | -5.373718 | -0.275405 |
| C | -5.021445 | -5.845264 | 0.736003  |
| C | -6.396243 | -5.648876 | 0.576945  |
| C | -6.910262 | -5.010695 | -0.546287 |
| C | -6.043702 | -4.548018 | -1.528484 |
| C | -4.659428 | -4.711289 | -1.414923 |
| C | -4.502028 | -6.519382 | 1.998566  |
| C | -4.590760 | -5.565984 | 3.200822  |
| C | -3.754073 | -4.159950 | -2.506250 |
| C | -3.895726 | -2.635266 | -2.625113 |
| C | -2.939016 | -7.725950 | -1.150475 |
| C | -4.007812 | -4.835988 | -3.861773 |
| C | -5.217734 | -7.842725 | 2.301586  |
| N | 0.074330  | -4.901125 | 0.780109  |
| C | 1.177300  | -4.158473 | 1.314278  |
| C | 2.032606  | -3.446976 | 0.440582  |
| C | 3.044330  | -2.658973 | 0.996508  |
| C | 3.221667  | -2.571516 | 2.372469  |
| C | 2.380956  | -3.284633 | 3.217622  |
| C | 1.351351  | -4.086899 | 2.714712  |
| C | 1.864480  | -3.482577 | -1.072650 |
| C | 3.177240  | -3.787514 | -1.807793 |
| C | 0.472097  | -4.860498 | 3.686785  |
| C | -0.324093 | -3.920848 | 4.604328  |
| C | 1.252051  | -2.170946 | -1.584743 |
| C | 1.290583  | -5.866567 | 4.510170  |
| O | -5.844857 | 1.771689  | 4.836828  |
| H | 1.916223  | -1.323844 | -1.378058 |
| H | 1.596574  | -7.808610 | 0.097652  |
| H | 1.849542  | -6.556958 | 3.870175  |
| H | 0.630702  | -6.460677 | 5.151763  |
| H | -4.045842 | -4.635338 | 3.015798  |
| H | -4.748589 | -8.339096 | 3.157910  |
| H | -6.271842 | -7.687057 | 2.554873  |
| H | -5.181237 | -8.530821 | 1.450627  |
| H | -4.174078 | -6.038090 | 4.098039  |
| H | -3.443379 | -6.751448 | 1.842914  |
| H | -1.203386 | -0.077703 | -1.120839 |
| H | -2.637879 | 0.401146  | -0.191288 |
| H | -1.015503 | 0.611610  | 3.114547  |
| H | -0.432333 | -0.931506 | 2.461495  |
| H | -5.634216 | -5.306916 | 3.414014  |
| H | -7.076100 | -6.001995 | 1.347901  |
| H | -7.982786 | -4.872065 | -0.653421 |
| H | -6.446644 | -4.041704 | -2.401891 |
| H | -5.025362 | -4.643066 | -4.219075 |
| H | -3.876031 | -5.921578 | -3.810377 |
| H | -3.314276 | -4.449475 | -4.616706 |
| H | -3.178345 | -2.242834 | -3.354927 |
| H | -4.898887 | -2.358000 | -2.968670 |
| H | -3.720976 | -2.145869 | -1.663881 |
| H | -2.719836 | -4.375492 | -2.218081 |
| H | -3.547266 | -7.325674 | -1.965477 |
| H | -3.635697 | -8.169079 | -0.431150 |
| H | -2.297164 | -8.517004 | -1.540663 |
| H | -0.430251 | -7.873137 | -0.668445 |
| H | 0.292078  | -1.974228 | -1.100905 |
| H | 1.091723  | -2.215382 | -2.668025 |
| H | 1.158212  | -4.282692 | -1.315174 |
| H | 2.989833  | -3.914848 | -2.879387 |
| H | 3.652577  | -4.701158 | -1.436214 |

|   |           |           |           |
|---|-----------|-----------|-----------|
| H | 3.902297  | -2.973646 | -1.700340 |
| H | 2.311525  | -6.256758 | -0.365615 |
| H | 2.076179  | -6.623673 | 1.334667  |
| H | 3.702787  | -2.099333 | 0.337456  |
| H | 4.014097  | -1.951944 | 2.783539  |
| H | 2.524500  | -3.220400 | 4.293220  |
| H | -0.247989 | -5.436625 | 3.095764  |
| H | -0.962945 | -3.248645 | 4.024654  |
| H | -0.961697 | -4.501703 | 5.280671  |
| H | 0.344962  | -3.313307 | 5.224125  |
| H | 2.012281  | -5.359217 | 5.159640  |
| H | -0.987742 | 1.660217  | 0.956255  |
| H | 0.286348  | 0.459653  | 0.697873  |
| H | -4.530595 | -1.909083 | 2.894059  |
| H | -5.716460 | -2.314495 | 1.644133  |
| H | -4.845474 | 0.536822  | 2.356765  |
| H | -6.062684 | 0.101719  | 1.157316  |
| H | -7.446518 | -0.956734 | 3.012043  |
| H | -7.194082 | 0.800682  | 3.204596  |
| H | -6.043287 | -1.600035 | 6.730084  |
| H | -4.601351 | -1.122628 | 7.673250  |
| H | -4.431864 | -1.630111 | 5.967485  |

### TS(F<sub>TMC</sub>→G<sub>TMC</sub>)

G = -2343,568597 u.a.

|    |           |           |           |
|----|-----------|-----------|-----------|
| C  | 1.713346  | 3.557462  | -1.728332 |
| C  | 2.059736  | 2.241301  | -1.329426 |
| C  | 2.694401  | 1.356774  | -2.231061 |
| C  | 2.967761  | 1.810376  | -3.526455 |
| C  | 2.617819  | 3.090062  | -3.936060 |
| C  | 1.993370  | 3.951295  | -3.040082 |
| N  | 1.801693  | 1.840708  | 0.019590  |
| Zn | 3.160087  | 2.120250  | 1.445867  |
| O  | 4.392306  | 3.671203  | 1.825600  |
| C  | 4.632727  | 4.820004  | 1.047707  |
| C  | 5.025878  | 4.471110  | -0.389311 |
| C  | 6.252870  | 3.544845  | -0.426226 |
| O  | 6.656382  | 3.150676  | 0.894521  |
| C  | 5.750863  | 2.413026  | 1.581598  |
| O  | 6.158840  | 2.182806  | 2.841002  |
| C  | 6.869799  | 3.215722  | 3.529198  |
| C  | 3.075120  | -0.068476 | -1.854499 |
| C  | 4.598067  | -0.266966 | -1.841246 |
| C  | 1.042457  | 4.529308  | -0.764206 |
| C  | -0.490842 | 4.432251  | -0.820557 |
| C  | 0.668951  | 1.193405  | 0.314054  |
| C  | -0.284475 | 0.800156  | -0.794920 |
| C  | 0.282717  | 0.789431  | 1.602247  |
| C  | 0.959745  | 0.862424  | 2.834869  |
| C  | 0.228556  | 0.281428  | 4.023875  |
| N  | 2.179052  | 1.372252  | 3.000269  |
| C  | 2.793796  | 1.335439  | 4.295247  |
| C  | 3.509073  | 0.185475  | 4.701725  |
| C  | 4.146670  | 0.205562  | 5.946050  |
| C  | 4.089265  | 1.319835  | 6.775146  |
| C  | 3.375863  | 2.440355  | 6.365040  |
| C  | 2.715952  | 2.471620  | 5.132755  |
| C  | 3.621809  | -1.061550 | 3.834524  |
| C  | 5.053583  | -1.254268 | 3.312476  |
| C  | 1.927150  | 3.714800  | 4.746656  |
| C  | 0.770303  | 3.978439  | 5.722177  |
| C  | 3.149834  | -2.324087 | 4.572016  |
| C  | 2.835601  | 4.947223  | 4.636224  |
| C  | 1.468976  | 5.986972  | -0.978721 |
| O  | 5.066146  | 1.498094  | 1.026548  |
| C  | 2.413618  | -1.097288 | -2.785173 |
| H  | 2.139751  | -2.212629 | 4.979463  |
| H  | 3.147525  | -3.182356 | 3.891102  |
| H  | 3.813051  | -2.573508 | 5.407595  |

|   |           |           |           |
|---|-----------|-----------|-----------|
| H | 4.704993  | -0.669943 | 6.267887  |
| H | 5.109394  | -2.145073 | 2.675887  |
| H | 5.755399  | -1.394657 | 4.142742  |
| H | 5.382006  | -0.391834 | 2.728935  |
| H | 2.972235  | -0.924167 | 2.964212  |
| H | 3.335153  | 3.308512  | 7.017372  |
| H | 0.343867  | 0.909687  | 4.909762  |
| H | -0.833819 | 0.159469  | 3.806331  |
| H | 0.638501  | -0.701413 | 4.278889  |
| H | 1.492887  | 3.537848  | 3.757403  |
| H | 2.254064  | 5.824417  | 4.328285  |
| H | 3.619946  | 4.772223  | 3.894728  |
| H | 3.305193  | 5.182532  | 5.597954  |
| H | 0.183323  | 4.844753  | 5.396588  |
| H | 0.092924  | 3.121387  | 5.791237  |
| H | 1.140576  | 4.189579  | 6.731356  |
| H | -0.689091 | 0.311723  | 1.650003  |
| H | -1.308979 | 0.742562  | -0.421171 |
| H | -0.249529 | 1.484829  | -1.643063 |
| H | -0.014462 | -0.194464 | -1.167390 |
| H | 1.050433  | 6.403789  | -1.901604 |
| H | 1.101746  | 6.607830  | -0.154738 |
| H | 2.556503  | 6.094018  | -1.027410 |
| H | -0.944324 | 5.158753  | -0.136997 |
| H | -0.850226 | 3.441342  | -0.535476 |
| H | -0.855262 | 4.647994  | -1.831485 |
| H | 1.726844  | 4.952532  | -3.365522 |
| H | 2.831571  | 3.418344  | -4.949734 |
| H | 3.458529  | 1.140762  | -4.228163 |
| H | 2.811991  | -1.029722 | -3.803665 |
| H | 1.329876  | -0.959576 | -2.848092 |
| H | 2.712652  | -0.252528 | -0.838231 |
| H | 2.607784  | -2.113743 | -2.425963 |
| H | 5.072939  | 0.377595  | -1.097978 |
| H | 4.842277  | -1.305379 | -1.590261 |
| H | 5.031946  | -0.053939 | -2.825168 |
| H | 6.064321  | 2.650394  | -1.025375 |
| H | 7.134922  | 4.051859  | -0.823215 |
| H | 5.442619  | 5.401854  | 1.515516  |
| H | 3.740855  | 5.461252  | 1.045608  |
| H | 1.347351  | 4.237477  | 0.248188  |
| H | 4.603936  | 1.325871  | 7.731321  |
| H | 5.234163  | 5.394835  | -0.942709 |
| H | 4.178100  | 3.990285  | -0.886473 |
| C | 7.201486  | 2.679612  | 4.910419  |
| C | 7.989921  | 3.662081  | 5.758012  |
| O | 7.249435  | 4.876446  | 6.003443  |
| C | 6.458444  | 4.865569  | 7.092955  |
| O | 5.792343  | 6.017235  | 7.239546  |
| C | 6.003612  | 7.080000  | 6.306779  |
| O | 6.341003  | 3.954574  | 7.874273  |
| H | 6.229519  | 4.101541  | 3.587655  |
| H | 7.779462  | 3.474241  | 2.975745  |
| H | 6.282992  | 2.396009  | 5.432341  |
| H | 7.802995  | 1.768419  | 4.804915  |
| H | 8.899487  | 3.996918  | 5.250249  |
| H | 8.252271  | 3.214482  | 6.719130  |
| H | 7.052077  | 7.388412  | 6.290932  |
| H | 5.379893  | 7.900915  | 6.662020  |
| H | 5.695886  | 6.788836  | 5.299567  |

### G<sub>TMC</sub>

G = -2343,574646 u.a.

|   |          |          |           |
|---|----------|----------|-----------|
| C | 1.635762 | 3.573690 | -1.784781 |
| C | 2.016596 | 2.274665 | -1.358464 |
| C | 2.679329 | 1.391090 | -2.241496 |
| C | 2.941550 | 1.824440 | -3.546479 |
| C | 2.559144 | 3.085302 | -3.981626 |
| C | 1.912060 | 3.947855 | -3.102582 |

|    |           |           |           |
|----|-----------|-----------|-----------|
| N  | 1.766655  | 1.895744  | -0.001829 |
| Zn | 3.003549  | 2.450379  | 1.465004  |
| O  | 3.975363  | 4.030262  | 1.783579  |
| C  | 4.382660  | 4.923651  | 0.795892  |
| C  | 4.990755  | 4.258128  | -0.448854 |
| C  | 6.385721  | 3.669449  | -0.252638 |
| O  | 6.678351  | 3.280674  | 1.109246  |
| C  | 5.960543  | 2.308692  | 1.649984  |
| O  | 6.255392  | 2.096987  | 2.923242  |
| C  | 7.060037  | 3.059771  | 3.632458  |
| C  | 3.117502  | -0.009537 | -1.834685 |
| C  | 4.647844  | -0.142352 | -1.822479 |
| C  | 0.939536  | 4.547334  | -0.839819 |
| C  | -0.574024 | 4.292061  | -0.748832 |
| C  | 0.679780  | 1.173638  | 0.289861  |
| C  | -0.235262 | 0.704613  | -0.822003 |
| C  | 0.303417  | 0.770829  | 1.580814  |
| C  | 0.969892  | 0.891822  | 2.815173  |
| C  | 0.262100  | 0.268509  | 3.998027  |
| N  | 2.152473  | 1.480289  | 2.983563  |
| C  | 2.786151  | 1.440776  | 4.267867  |
| C  | 3.484666  | 0.278976  | 4.675707  |
| C  | 4.138667  | 0.296893  | 5.911546  |
| C  | 4.111435  | 1.417468  | 6.734126  |
| C  | 3.411251  | 2.546642  | 6.324948  |
| C  | 2.736732  | 2.582888  | 5.100510  |
| C  | 3.554413  | -0.985708 | 3.827886  |
| C  | 4.966370  | -1.220398 | 3.271228  |
| C  | 1.929628  | 3.821694  | 4.737914  |
| C  | 0.726843  | 3.987573  | 5.680428  |
| C  | 3.085099  | -2.226650 | 4.604197  |
| C  | 2.790327  | 5.091246  | 4.718171  |
| C  | 1.180820  | 6.019395  | -1.194824 |
| O  | 5.157165  | 1.593868  | 1.059114  |
| C  | 2.507362  | -1.087705 | -2.744573 |
| H  | 2.102952  | -2.081635 | 5.065024  |
| H  | 3.022619  | -3.092064 | 3.935259  |
| H  | 3.785165  | -2.486234 | 5.405922  |
| H  | 4.682393  | -0.587467 | 6.234429  |
| H  | 4.989339  | -2.135151 | 2.667307  |
| H  | 5.691989  | -1.340166 | 4.084042  |
| H  | 5.287896  | -0.386325 | 2.645565  |
| H  | 2.886657  | -0.854460 | 2.970883  |
| H  | 3.383831  | 3.415908  | 6.976583  |
| H  | 0.452382  | 0.820988  | 4.919906  |
| H  | -0.814237 | 0.226609  | 3.819368  |
| H  | 0.613383  | -0.756237 | 4.157329  |
| H  | 1.538762  | 3.679565  | 3.725563  |
| H  | 2.170587  | 5.961765  | 4.472897  |
| H  | 3.567475  | 5.001988  | 3.954323  |
| H  | 3.252044  | 5.280312  | 5.693960  |
| H  | 0.120777  | 4.850215  | 5.381023  |
| H  | 0.079785  | 3.104533  | 5.673938  |
| H  | 1.051837  | 4.151523  | 6.713957  |
| H  | -0.640064 | 0.239187  | 1.629781  |
| H  | -1.249231 | 0.552066  | -0.446431 |
| H  | -0.265831 | 1.400977  | -1.661201 |
| H  | 0.120641  | -0.256657 | -1.208189 |
| H  | 0.636650  | 6.315737  | -2.099035 |
| H  | 0.821855  | 6.659101  | -0.382158 |
| H  | 2.241346  | 6.236620  | -1.353116 |
| H  | -1.044260 | 5.034634  | -0.094458 |
| H  | -0.801908 | 3.305199  | -0.341764 |
| H  | -1.040874 | 4.371749  | -1.737318 |
| H  | 1.622982  | 4.935077  | -3.449222 |
| H  | 2.766295  | 3.399745  | -5.001100 |
| H  | 3.452418  | 1.154497  | -4.233499 |
| H  | 2.911635  | -1.027761 | -3.761244 |
| H  | 1.419642  | -0.998765 | -2.820951 |
| H  | 2.765384  | -0.187158 | -0.813784 |

|   |          |           |           |
|---|----------|-----------|-----------|
| H | 2.741199 | -2.086231 | -2.359501 |
| H | 5.098669 | 0.548461  | -1.107116 |
| H | 4.938218 | -1.159628 | -1.536388 |
| H | 5.067572 | 0.055008  | -2.815720 |
| H | 6.557177 | 2.808028  | -0.904994 |
| H | 7.159732 | 4.414833  | -0.449265 |
| H | 5.129769 | 5.617680  | 1.223895  |
| H | 3.549951 | 5.560539  | 0.449649  |
| H | 1.357510 | 4.377549  | 0.160847  |
| H | 4.635384 | 1.420338  | 7.685323  |
| H | 5.063544 | 4.993243  | -1.261460 |
| H | 4.301598 | 3.484681  | -0.801444 |
| C | 7.306687 | 2.498818  | 5.019432  |
| C | 8.104223 | 3.448951  | 5.897106  |
| O | 7.396447 | 4.684643  | 6.118320  |
| C | 6.592736 | 4.707771  | 7.201374  |
| O | 5.950361 | 5.872753  | 7.323791  |
| C | 6.167480 | 6.908192  | 6.360731  |
| O | 6.453137 | 3.809987  | 7.994294  |
| H | 6.509693 | 4.003457  | 3.667708  |
| H | 7.999017 | 3.220545  | 3.092922  |
| H | 6.353884 | 2.264527  | 5.502886  |
| H | 7.865516 | 1.558651  | 4.938244  |
| H | 9.043467 | 3.750025  | 5.422990  |
| H | 8.315600 | 2.988174  | 6.864343  |
| H | 7.221294 | 7.194920  | 6.320859  |
| H | 5.565448 | 7.749306  | 6.705426  |
| H | 5.835128 | 6.597504  | 5.367393  |

TS(G<sub>TMC</sub>→H<sub>TMC</sub>)

G = -2343,572007 u.a.

|    |           |           |           |
|----|-----------|-----------|-----------|
| C  | -1.008202 | -1.677077 | 2.946728  |
| C  | -1.241379 | -0.332198 | 3.324574  |
| C  | -2.155169 | -0.018325 | 4.356461  |
| C  | -2.755834 | -1.072347 | 5.053880  |
| C  | -2.482903 | -2.398126 | 4.739953  |
| C  | -1.628526 | -2.691008 | 3.682160  |
| N  | -0.476753 | 0.703697  | 2.699355  |
| C  | -0.903119 | 1.260272  | 1.560763  |
| C  | -2.256137 | 0.865184  | 1.017086  |
| C  | -2.539981 | 1.415955  | 4.697580  |
| C  | -2.128591 | 1.822198  | 6.119952  |
| C  | -0.144147 | -2.039782 | 1.743514  |
| C  | -0.882564 | -2.980818 | 0.779205  |
| Zn | 1.325286  | 1.113637  | 3.412366  |
| O  | 2.468653  | 0.148150  | 4.509515  |
| C  | 2.097778  | -0.909008 | 5.348354  |
| C  | 1.013901  | -0.554976 | 6.373130  |
| C  | 1.492572  | 0.269481  | 7.563718  |
| O  | 2.605686  | 1.135987  | 7.267246  |
| C  | 2.384233  | 2.141977  | 6.423107  |
| O  | 3.489992  | 2.836817  | 6.164422  |
| C  | 4.761048  | 2.325920  | 6.602801  |
| N  | 1.883256  | 2.467658  | 2.075715  |
| C  | 3.157732  | 3.115994  | 2.199574  |
| C  | 3.233327  | 4.452776  | 2.657673  |
| C  | 4.498971  | 5.023922  | 2.824763  |
| C  | 5.662073  | 4.314363  | 2.549718  |
| C  | 5.570348  | 3.007312  | 2.086070  |
| C  | 4.331330  | 2.387872  | 1.896356  |
| C  | 2.003763  | 5.297521  | 2.971231  |
| C  | 1.865458  | 5.567187  | 4.476531  |
| C  | 4.294157  | 0.974308  | 1.332007  |
| C  | 4.990105  | -0.032504 | 2.258249  |
| C  | 2.010079  | 6.626833  | 2.199286  |
| C  | 1.122817  | 2.710622  | 1.008262  |
| C  | -0.163735 | 2.174798  | 0.798451  |
| C  | 1.632625  | 3.623219  | -0.084350 |
| C  | 4.891215  | 0.925187  | -0.083082 |

|   |           |           |           |
|---|-----------|-----------|-----------|
| C | 1.209691  | -2.641827 | 2.143588  |
| C | -4.048093 | 1.644677  | 4.502263  |
| O | 1.304549  | 2.466413  | 5.965959  |
| H | 1.463705  | 4.671951  | 0.179377  |
| H | 2.706570  | 3.500108  | -0.239087 |
| H | 1.109852  | 3.426221  | -1.022063 |
| H | 5.953737  | 1.191599  | -0.076869 |
| H | 4.804932  | -0.084697 | -0.499557 |
| H | 4.380611  | 1.615156  | -0.762768 |
| H | -0.648155 | 2.506760  | -0.112072 |
| H | 2.164004  | 6.485825  | 1.124685  |
| H | 1.059175  | 7.152070  | 2.340934  |
| H | 2.803995  | 7.291999  | 2.556029  |
| H | 1.117073  | 4.734604  | 2.662694  |
| H | 6.637468  | 4.768258  | 2.697681  |
| H | 4.571759  | 6.048223  | 3.181236  |
| H | 0.979636  | 6.183973  | 4.668968  |
| H | 2.737772  | 6.110485  | 4.857819  |
| H | 1.766926  | 4.637724  | 5.040051  |
| H | 6.482855  | 2.460946  | 1.863863  |
| H | 3.244230  | 0.673666  | 1.250319  |
| H | -2.008797 | 2.074781  | 4.003053  |
| H | 6.044708  | 0.226415  | 2.404507  |
| H | 4.487575  | -0.066359 | 3.229657  |
| H | 4.954659  | -1.036489 | 1.818957  |
| H | -3.039673 | 1.036745  | 1.760116  |
| H | -2.282067 | -0.202047 | 0.775543  |
| H | -2.498779 | 1.430230  | 0.116026  |
| H | -3.452113 | -0.845862 | 5.857591  |
| H | -2.951758 | -3.201322 | 5.302153  |
| H | 1.076847  | -3.544986 | 2.750112  |
| H | -1.445461 | -3.728998 | 3.415975  |
| H | 1.810657  | -1.931219 | 2.717956  |
| H | 0.066500  | -1.115464 | 1.196709  |
| H | 1.781410  | -2.920599 | 1.251168  |
| H | -0.299058 | -3.116081 | -0.137866 |
| H | -1.866131 | -2.588926 | 0.500635  |
| H | -1.035586 | -3.973291 | 1.216783  |
| H | -4.293195 | 2.703017  | 4.642786  |
| H | -4.385887 | 1.349956  | 3.503521  |
| H | -4.636196 | 1.072006  | 5.227985  |
| H | -2.569102 | 1.151842  | 6.867192  |
| H | -2.481262 | 2.836455  | 6.337972  |
| H | -1.043013 | 1.820546  | 6.242267  |
| H | 1.897813  | -0.375961 | 8.347112  |
| H | 2.997976  | -1.257096 | 5.884584  |
| H | 1.728780  | -1.777092 | 4.779264  |
| H | 0.682479  | 0.869847  | 7.990028  |
| H | 0.205283  | -0.038673 | 5.848474  |
| H | 0.575520  | -1.477923 | 6.775101  |
| C | 5.808979  | 3.351025  | 6.212604  |
| C | 7.213788  | 2.933774  | 6.612537  |
| O | 7.612547  | 1.712314  | 5.957826  |
| C | 8.221848  | 1.862729  | 4.765312  |
| O | 8.527250  | 0.686903  | 4.207489  |
| C | 8.203035  | -0.526970 | 4.891773  |
| O | 8.487910  | 2.913170  | 4.235636  |
| H | 4.937223  | 1.362596  | 6.117181  |
| H | 4.741041  | 2.169770  | 7.686974  |
| H | 5.770723  | 3.532348  | 5.134502  |
| H | 5.584659  | 4.304403  | 6.706378  |
| H | 7.281441  | 2.706549  | 7.680831  |
| H | 7.932388  | 3.716578  | 6.360370  |
| H | 8.697905  | -0.574424 | 5.865063  |
| H | 8.571432  | -1.325406 | 4.247191  |
| H | 7.123438  | -0.626836 | 5.026275  |

H<sub>TMC</sub>

G = -2343,600701 u.a.

|    |           |           |           |
|----|-----------|-----------|-----------|
| C  | 2.990565  | 4.253269  | 2.683310  |
| C  | 3.040799  | 2.960670  | 2.117602  |
| C  | 4.270647  | 2.285622  | 1.954761  |
| C  | 5.443543  | 2.938151  | 2.344818  |
| C  | 5.411884  | 4.217534  | 2.887001  |
| C  | 4.192439  | 4.861697  | 3.057321  |
| N  | 1.819021  | 2.291642  | 1.777492  |
| C  | 1.315992  | 2.390340  | 0.545931  |
| C  | 2.052139  | 3.220211  | -0.478758 |
| C  | 4.336862  | 0.858008  | 1.433225  |
| C  | 5.399989  | 0.661729  | 0.345359  |
| C  | 1.671488  | 4.964168  | 2.944671  |
| C  | 1.649903  | 6.400571  | 2.406189  |
| Zn | 0.910804  | 1.228018  | 3.142822  |
| O  | 1.444165  | 1.084418  | 4.878754  |
| C  | 0.908243  | 0.188672  | 5.818491  |
| C  | 1.160342  | 0.699970  | 7.236483  |
| C  | 2.643229  | 0.869125  | 7.515677  |
| O  | 2.876639  | 1.448108  | 8.817840  |
| C  | 2.864114  | 0.593175  | 9.839689  |
| O  | 2.713568  | -0.608081 | 9.782827  |
| N  | -0.610518 | 0.580596  | 2.104450  |
| C  | -0.763921 | 0.936624  | 0.825616  |
| C  | 0.127245  | 1.764601  | 0.121463  |
| C  | -1.568388 | -0.264513 | 2.752473  |
| C  | -2.630318 | 0.321460  | 3.477642  |
| C  | -3.489685 | -0.517946 | 4.192775  |
| C  | -3.317133 | -1.897151 | 4.193859  |
| C  | -2.275223 | -2.459755 | 3.466166  |
| C  | -1.387583 | -1.665504 | 2.734240  |
| C  | -2.836761 | 1.828629  | 3.522599  |
| C  | -4.278772 | 2.236008  | 3.191447  |
| C  | -0.244807 | -2.319924 | 1.971393  |
| C  | 0.841590  | -2.825265 | 2.932703  |
| C  | -1.968064 | 0.427607  | 0.069993  |
| C  | -0.723989 | -3.452870 | 1.053263  |
| C  | -2.407830 | 2.401045  | 4.882332  |
| O  | 3.054535  | 1.297874  | 10.965829 |
| C  | 3.076364  | 0.514109  | 12.165734 |
| C  | 3.213091  | 1.484739  | 13.324807 |
| C  | 3.231326  | 0.789730  | 14.676205 |
| O  | 4.336213  | -0.125721 | 14.791589 |
| C  | 5.483779  | 0.412472  | 15.223142 |
| O  | 5.661668  | 1.566792  | 15.542726 |
| O  | 6.404102  | -0.556420 | 15.246155 |
| C  | 7.693348  | -0.132853 | 15.694183 |
| C  | 4.557560  | -0.120733 | 2.598199  |
| C  | 1.338803  | 4.934317  | 4.445263  |
| H  | 2.196626  | 4.243001  | -0.118136 |
| H  | 3.051526  | 2.811689  | -0.660080 |
| H  | 1.510676  | 3.252190  | -1.425157 |
| H  | 6.414384  | 0.800324  | 0.734353  |
| H  | 5.344825  | -0.355136 | -0.058008 |
| H  | 5.264629  | 1.362621  | -0.484832 |
| H  | -0.143127 | 1.952786  | -0.910436 |
| H  | 1.888171  | 6.437599  | 1.338038  |
| H  | 0.657559  | 6.842866  | 2.545852  |
| H  | 2.367288  | 7.042696  | 2.928351  |
| H  | 0.885789  | 4.409172  | 2.421384  |
| H  | 6.334819  | 4.707395  | 3.185188  |
| H  | 4.170198  | 5.854912  | 3.497907  |
| H  | 0.361143  | 5.392361  | 4.634252  |
| H  | 2.086729  | 5.492387  | 5.019829  |
| H  | 1.322053  | 3.910116  | 4.831494  |
| H  | 6.397847  | 2.431293  | 2.229938  |
| H  | 3.366129  | 0.622213  | 0.984793  |
| H  | -2.189369 | 2.274759  | 2.760546  |
| H  | 5.531439  | 0.052110  | 3.069972  |
| H  | 3.793318  | 0.000037  | 3.372949  |
| H  | 4.534246  | -1.158122 | 2.245525  |

|   |           |           |           |
|---|-----------|-----------|-----------|
| H | -2.894400 | 0.730375  | 0.568012  |
| H | -1.974026 | -0.666476 | 0.041179  |
| H | -1.980668 | 0.804415  | -0.953524 |
| H | -4.305581 | -0.081323 | 4.762822  |
| H | -3.993303 | -2.531938 | 4.759906  |
| H | 0.444476  | -3.592204 | 3.606856  |
| H | -2.143762 | -3.538556 | 3.469487  |
| H | 1.237591  | -2.015218 | 3.553066  |
| H | 0.211669  | -1.554502 | 1.335370  |
| H | 1.676314  | -3.266024 | 2.376477  |
| H | 0.108924  | -3.830711 | 0.450640  |
| H | -1.510208 | -3.116734 | 0.369473  |
| H | -1.122207 | -4.298743 | 1.623900  |
| H | -4.361028 | 3.326967  | 3.139343  |
| H | -4.604835 | 1.825911  | 2.230150  |
| H | -4.985788 | 1.893452  | 3.954606  |
| H | -3.014881 | 1.981880  | 5.692553  |
| H | -2.529744 | 3.489770  | 4.900215  |
| H | -1.359361 | 2.174970  | 5.101383  |
| H | 3.165697  | -0.090488 | 7.455471  |
| H | 1.369560  | -0.811299 | 5.720622  |
| H | -0.176913 | 0.038380  | 5.695129  |
| H | 3.087554  | 1.573712  | 6.812582  |
| H | 0.659348  | 1.666702  | 7.367245  |
| H | 0.731901  | -0.006296 | 7.957638  |
| H | 3.911421  | -0.192090 | 12.129569 |
| H | 2.152694  | -0.072030 | 12.235032 |
| H | 4.123763  | 2.081726  | 13.210972 |
| H | 2.369808  | 2.185733  | 13.311962 |
| H | 2.345048  | 0.164598  | 14.818017 |
| H | 3.290065  | 1.524490  | 15.482718 |
| H | 8.092126  | 0.649917  | 15.043869 |
| H | 8.323174  | -1.021211 | 15.650331 |
| H | 7.642780  | 0.248423  | 16.717324 |
